# Supplementary material for: Catalytic regioselective synthesis of pyrazole based pyrido[2,3-d]pyrimidine-diones and their biological evaluation
Source: Royal Society of Chemistry journal article supplement (doi:10.1039/c3ob42132e), 2014-01-01
Supplement: c3ob42132e.pdf [file c3ob42132e.pdf]

## **Catalytic regioselective synthesis of pyrazole based pyrido[2,3-*d*]pyrimidine- diones and their biological evaluation**

*Shailesh P. Satasia, Piyush N. Kalaria, Dipak K. Raval\**

Department of Chemistry, Sardar Patel University, Vallabh Vidyanagar- 388 120, Gujarat, India

\*Corresponding author. Tel.: +91-02692-226856 - Ext. - 211; Fax: +91-02692 236475.

E-mail: [dipanalka@yahoo.com](mailto:dipanalka@yahoo.com)

### **Supporting information**

## 1. Experimental part of biological evaluation

### 1.1 Instruments and Materials

All reactions were performed with commercially available reagents. They were used without further purification. The solvents used were of analytical grade. All reactions were monitored by thin-layer chromatography (TLC) on aluminum plates coated with silica gel 60 F<sub>254</sub>, 0.25 mm thickness (Merck). Detection of the components was made by exposure to iodine vapors or UV light. Melting points were taken in melting point apparatus  $\mu$ ThermoCal<sub>10</sub> (Analab Scientific Pvt. Ltd, India) and are uncorrected. The IR spectra were recorded in KBr on a Perkin-Elmer Spectrum GX FT-IR Spectrophotometer (Perkin-Elmer, USA) and only the characteristic peaks are reported in cm<sup>-1</sup>. Mass spectra were recorded on Shimadzu LCMS 2010 spectrometer (Shimadzu, Tokyo, Japan) purchased under PURSE program of DST at Sardar Patel University, Vallabh Vidyanagar. The synthesized compounds were identified by <sup>1</sup>H and <sup>13</sup>C NMR spectra recorded in DMSO-d<sub>6</sub> as a solvent on a Bruker Avance 400 MHz spectrometer (Bruker Scientific Corporation Ltd., Switzerland) using the residual solvent signal as an internal standard at 400 MHz and 100 MHz respectively. Chemical shifts are reported in parts per million (ppm). The elemental analysis was carried out by using Perkin-Elmer 2400 series-II elemental analyzer (Perkin-Elmer, USA) and all compounds are within  $\pm$  0.4% of the theoretical compositions. Ampicillin, griseofulvin, isoniazid and nystatin were purchased from local market.

### 1.2. *In vitro* antimicrobial assay

The *in vitro* antimicrobial activity of all synthesized pyrazole based pyrido [2,3- *d*]pyrimidinones derivatives **4a-r** was carried out by broth micro dilution method. Mueller – Hinton broth was used as nutrient medium to grow and dilute the compound suspension for the test bacteria. Sabouraud Dextrose broth was used for fungal nutrition. 2% DMSO in water was used as the diluent to get desired concentration of compounds to test upon standard bacterial strains. Inoculum size for test strain was adjusted to 10<sup>8</sup> CFU mL<sup>-1</sup> by comparing the turbidity. Serial dilutions were prepared in primary and secondary screening. Each synthesized compound and the standard drugs were diluted obtaining 2000  $\mu$ g/mL concentration as a stock solution. The drugs which were found to be active in primary screening (i.e. 500, 250 and 200  $\mu$ g/mL concentrations) were further screened in their second set of dilution at 100, 50, 25 and 12.5  $\mu$ g/mL concentration against all microorganisms. 10 micro liter suspensions were further inoculated on appropriate media and growth was noted after 1 and 2 days. The control tube containing no antibiotic was instantaneously sub cultured (before inoculation) by spreading a loopful evenly over an area of plate of medium suitable for the growth of the test organism. The tubes were then put for incubation at 37°C overnight. The highest dilution preventing appearance

of turbidity after spot subculture was considered as minimal inhibitory concentration (MIC,  $\mu\text{L}$ ). All the tubes showing no visible growth (same as control tube) were subcultured and incubated overnight at 37 °C. The amount of growth from the control tube before incubation was compared. In this study Ampicillin, Norfloxacin and Chloramphenicol were used as the standard antibacterial drugs. Nystatin and Griseofulvin were used as standard antifungal drugs. The results are summarized in **Table 4**.

### 1.3. *In vitro* antituberculosis assay

The antitubercular activity of all synthesized compound against *Mycobacterium tuberculosis* H37Rv was performed by Lowenstein-Jensen method [1] with minor modification where 250  $\mu\text{g/mL}$  and 100  $\mu\text{g/mL}$  dilution of each compound was added to Lowenstein-Jensen medium and then media was uncontaminated by inspissation method. A culture of *Mycobacterium tuberculosis* H37Rv growing on Lowenstein-Jensen medium was harvested in 0.85% saline in bijoux bottle. The stock solutions of the all compounds were prepared in 2% DMSO IN WATER i.e. 250  $\mu\text{g/mL}$  and 100  $\mu\text{g/mL}$ . These tubes were then incubated at 37 °C for 24 h followed by streaking of *Mycobacterium tuberculosis* H37Rv (5 – 104 bacilli per tube). The growth of bacilli was seen after two weeks, three weeks and finally after four weeks of incubation. The tubes having the compounds were compared with control tubes where medium alone was incubated with *Mycobacterium tuberculosis* H37Rv. The concentration at which complete inhibition of colonies occurred was taken as active concentration of the tested compound. The standard strain *Mycobacterium tuberculosis* H37Rv was tested with known drug isoniazid and rifampicin for comparison purpose. The results are summarized in **Table 5**.

### 1.4. *In vitro* antimalarial assay

All the synthesized compounds **4a-r** were screened for their antimalarial activity against the *P. falciparum* strain. The *P. falciparum* strain was acquired from Shree R. B Shah Mahavir Super-speciality hospital, Surat, Gujarat, India, and was used in the *in vitro* tests. The *P. falciparum* strains were cultivated by a modified method described by Trager and Jensen [2]. Compounds were dissolved in 2% DMSO in water. The final concentration of DMSO used was not toxic and did not interfere with the assay. The antiparasitic effect of the compounds was measured by growth inhibition percentage as described by Carvalho and Krettli [3]. For experimental purposes, the cultures were synchronized with 5% D-sorbitol when the parasites were in the ring stage [4]. The parasite suspension, consisting of predominately the ring stage, was adjusted to a 1-2 % parasitaemia and 2.5 % haematocrit in hypoxanthine-free RPMI-1640 culture medium with 10% human plasma and was exposed to 7 concentrations of each compound for a single cycle of parasite growth of 48 h at 37 °C. A positive control with reference to antimalarial drugs

in standard concentrations was used in each experiment. The stock solutions were additionally diluted in whole medium (RPMI 1640 plus 10% human serum) to each of the used concentrations. The concentration that inhibited 50% of parasite growth ( $IC_{50}$  value) was determined by interpolation using Microcal Origin software. The standard drugs chloroquine and quinine were used as the reference antimalarial agents, blood smears were read blind and each duplicate experiment was repeated three times. The results are summarized in **Table 6**.

## LC-MS of compound 4a

Acquired by : Admin  
 Sample ID : 16  
 Vial# : 16  
 Injection Volume : 10  
 Data File : JAG-1-1-2-121cd  
 Method file : X-BRIDGE\_150\_12min\_AA-FA.lcm

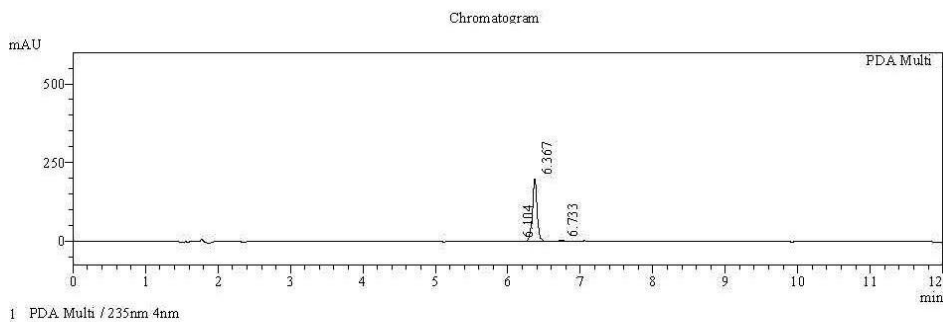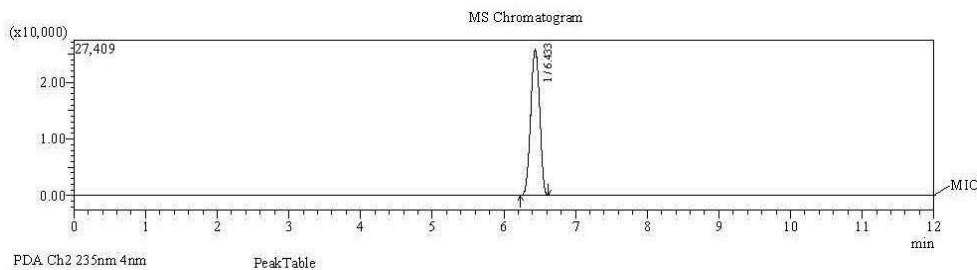

| Peak#        | Ret. Time | Area          | Height        | Area %         |
|--------------|-----------|---------------|---------------|----------------|
| 1            | 6.104     | 3962          | 826           | 0.442          |
| 2            | 6.367     | 879809        | 199559        | 98.143         |
| 3            | 6.733     | 12681         | 2990          | 1.415          |
| <b>Total</b> |           | <b>896452</b> | <b>203375</b> | <b>100.000</b> |

| MSTABLE MIC1 |           |               |               |               |        |
|--------------|-----------|---------------|---------------|---------------|--------|
| Peak#        | Ret. Time | Base Peak m/z | Area          | Area%         | Event# |
| 1            | 6.433     | 369.20        | 224750        | 100.00        | 1-1    |
| <b>Total</b> |           |               | <b>224750</b> | <b>100.00</b> |        |

### MS Spectrum Graph

#1 Ret. Time: Averaged 6.417-6.450 (Scan#: 386-388)  
 BG Mode: Calc 6.233<->6.617 (375<->398)  
 Base Peak: 369.20 (41512) Polarity: Pos Segment1 - Event1  
 Intensity

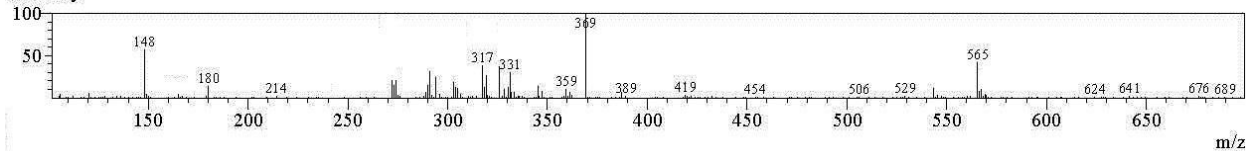

### <sup>1</sup>H NMR of compound **4a**

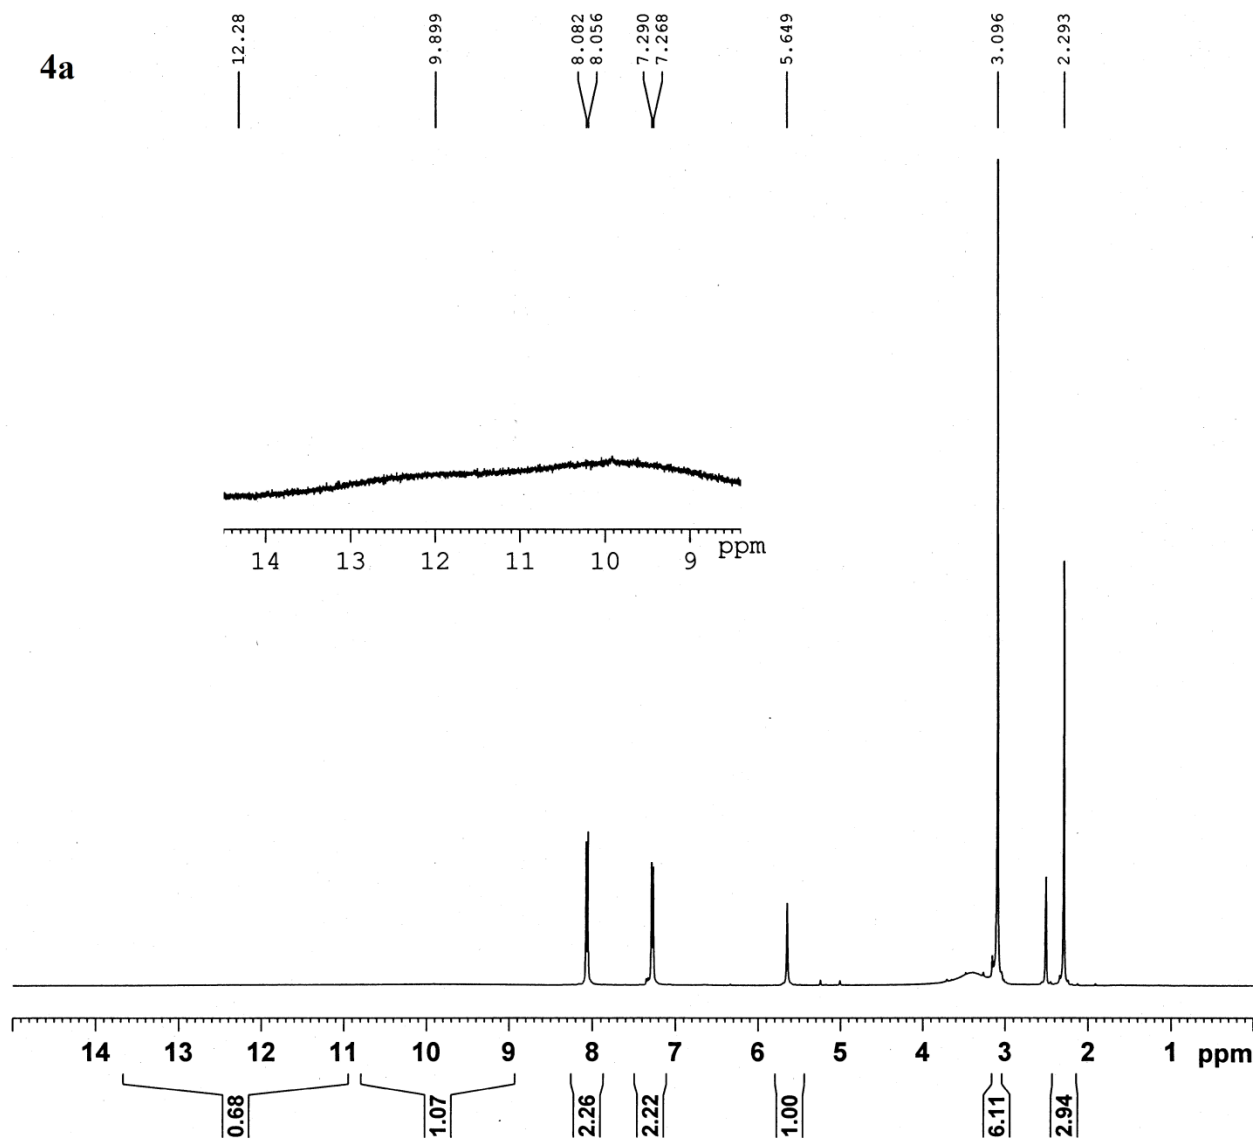

$^1\text{H}$ NMR of compound **4a** (DMSO+D<sub>2</sub>O)

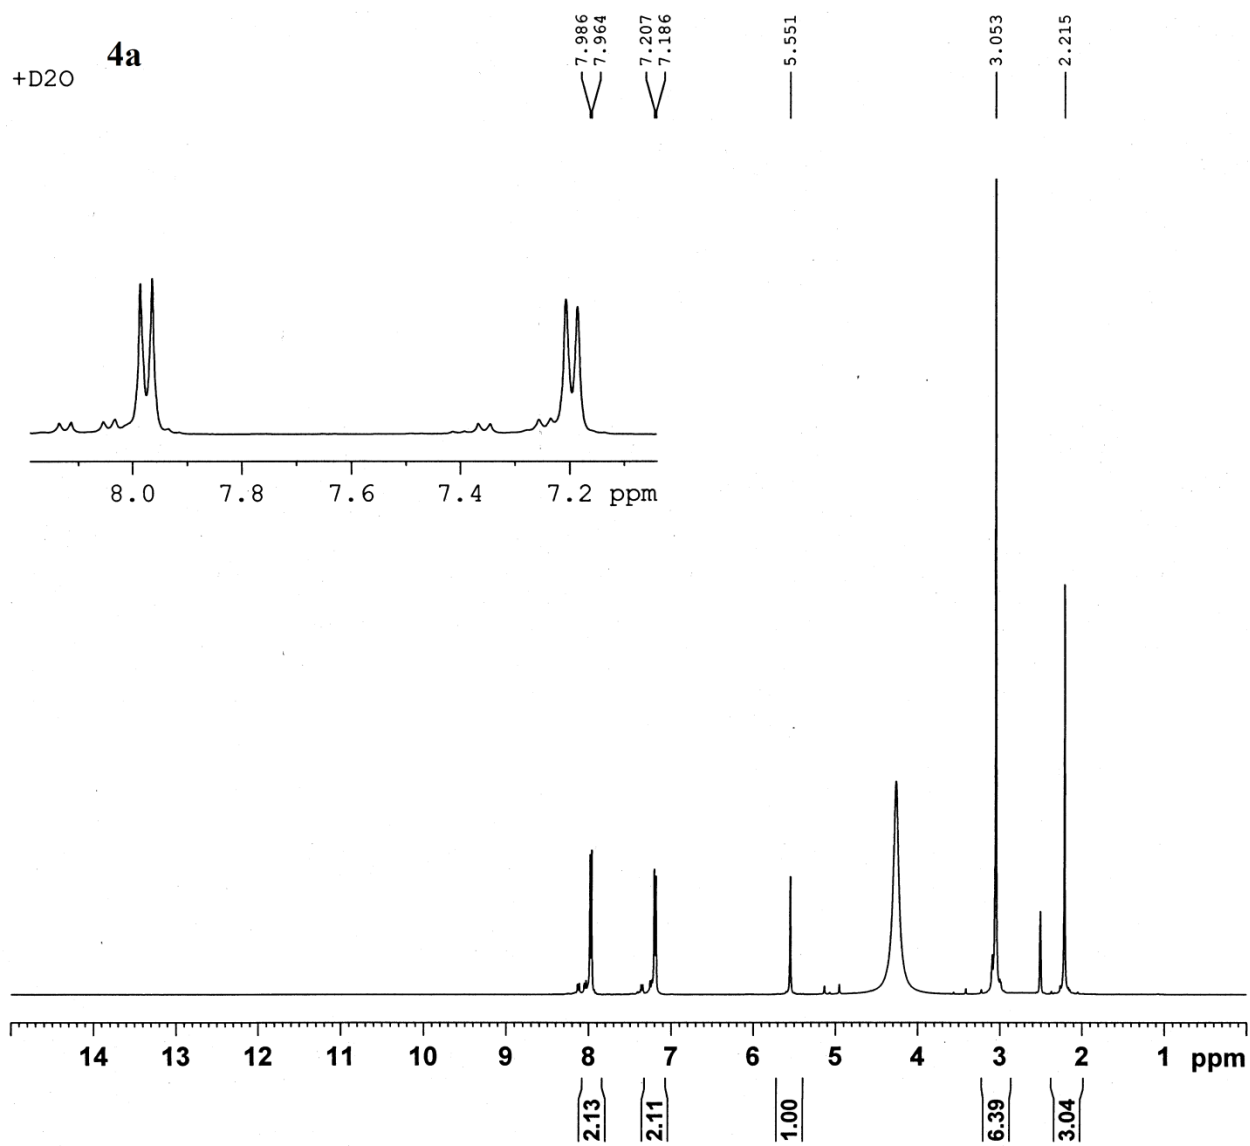

### $^{13}\text{C}$ NMR of compound **4a**

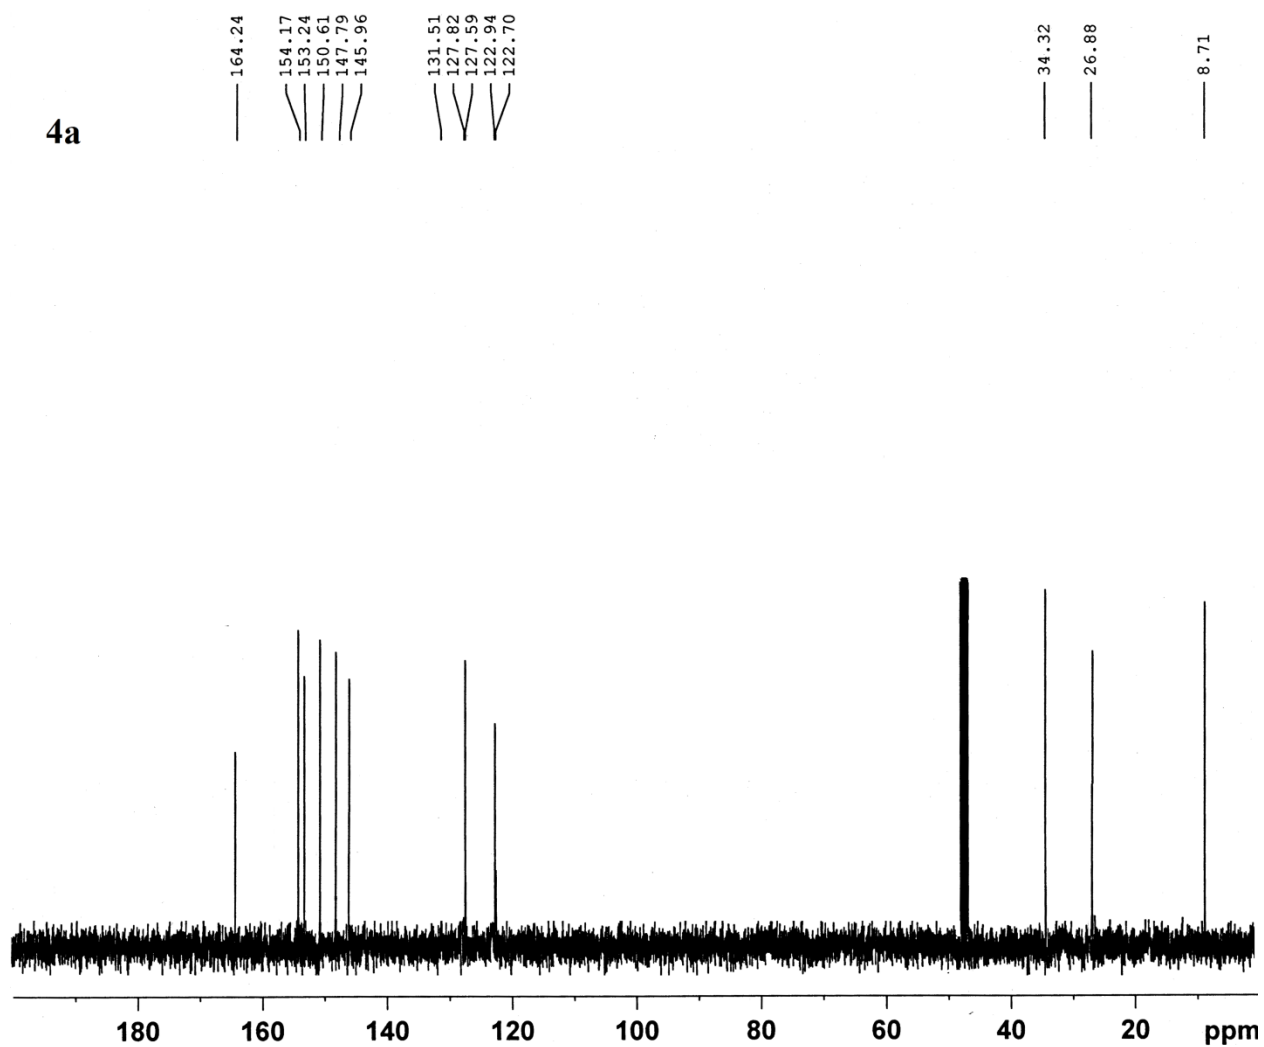



## LC-MS of compound **4b**

Acquired by : Admin  
Sample ID : 2  
Vial# : 2  
Injection Volume : 10  
Data File : VTX-622-D-43-FINAL-AP-41cd  
Method file : GENESIS-LCMS-ESI-150.lcm

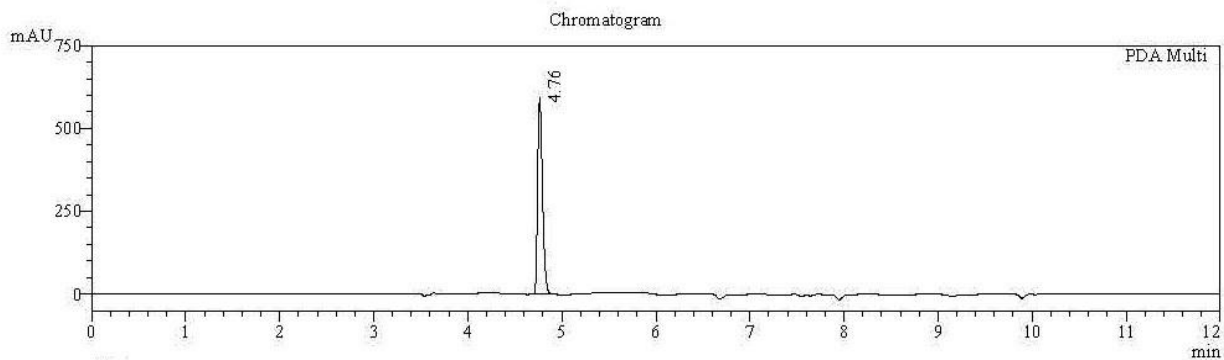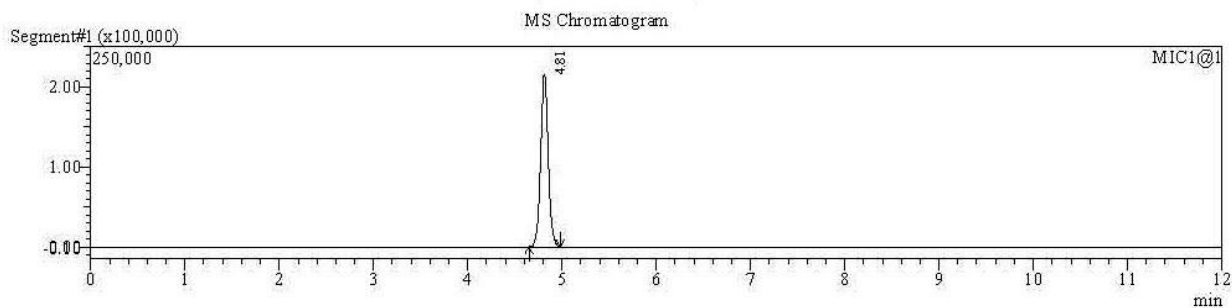

PeakTable

PDA Ch1 272nm 4nm

| Peak# | Ret. Time | Area    | Height | Area % |
|-------|-----------|---------|--------|--------|
| 1     | 4.76      | 2126211 | 591590 | 100.00 |
| Total |           | 2126211 | 591590 | 100.00 |

MSTABLE MIC1

| Peak# | Ret. Time | Base Peak m/z | Area    | Area%  | Event# |
|-------|-----------|---------------|---------|--------|--------|
| 1     | 4.81      | 322.20        | 1203267 | 100.00 | 1-1    |
| Total |           |               | 1203267 | 100.00 |        |

MS Spectrum Graph

# 1 Ret. Time: Averaged 4.783-4.817 (Scan# 288-290)

BG Mode: Calc 4.650 <-> 4.983 (280 <-> 300)

Base Peak: 322.20 (514975) Polarity: Pos Segment1 - Event1

Intensity

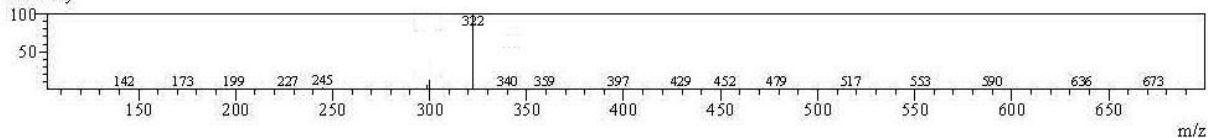

# <sup>1</sup>H NMR of compound **4b**

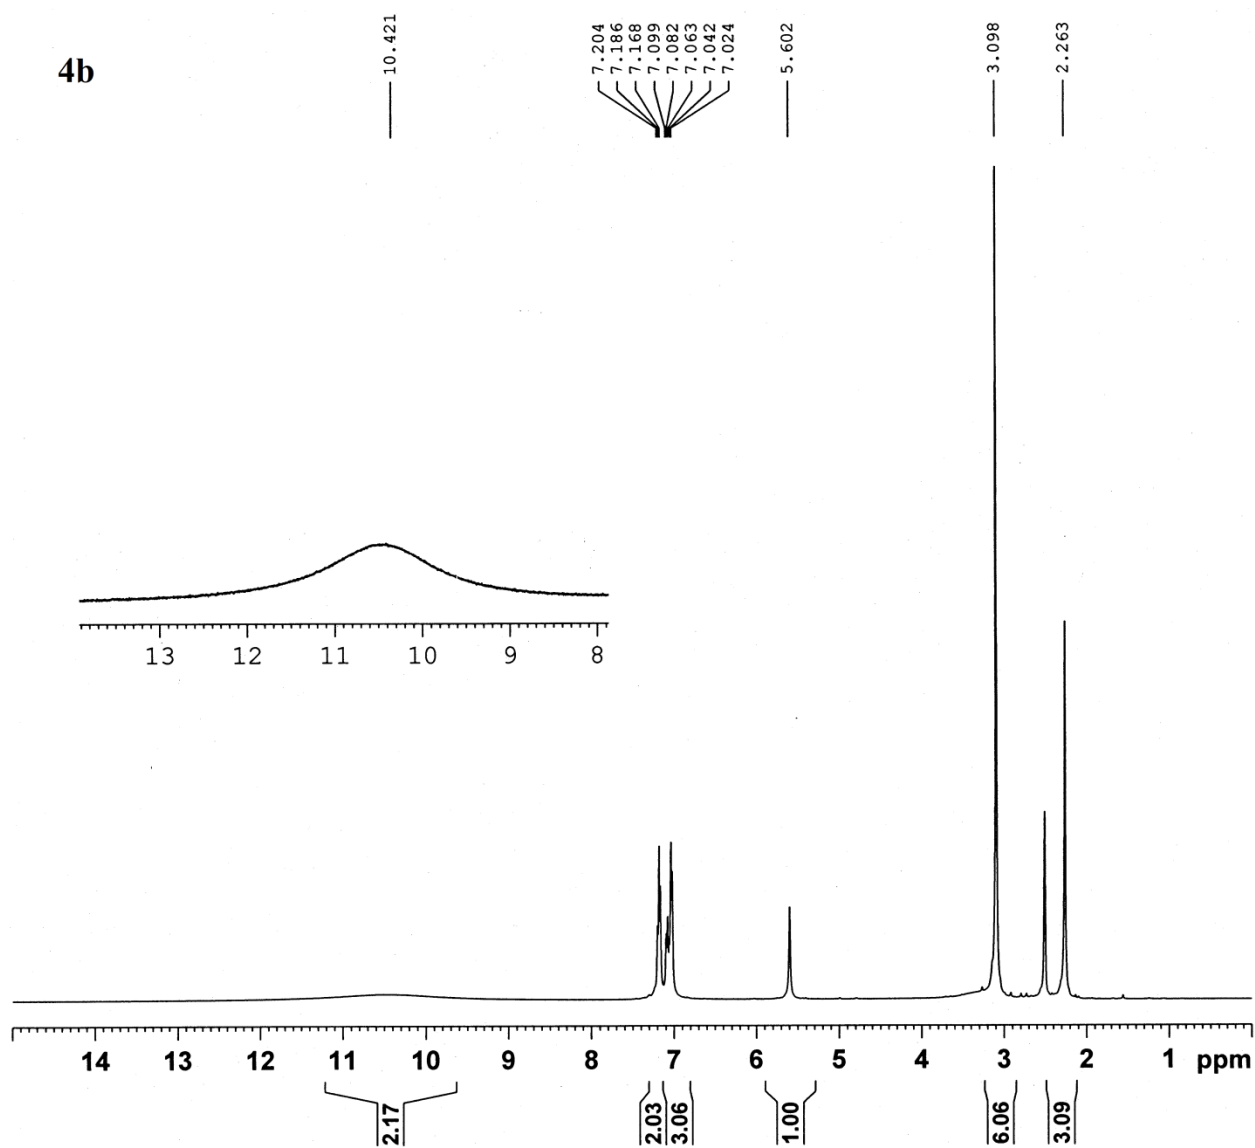

$^{13}\text{C}$ NMR of compound **4b**

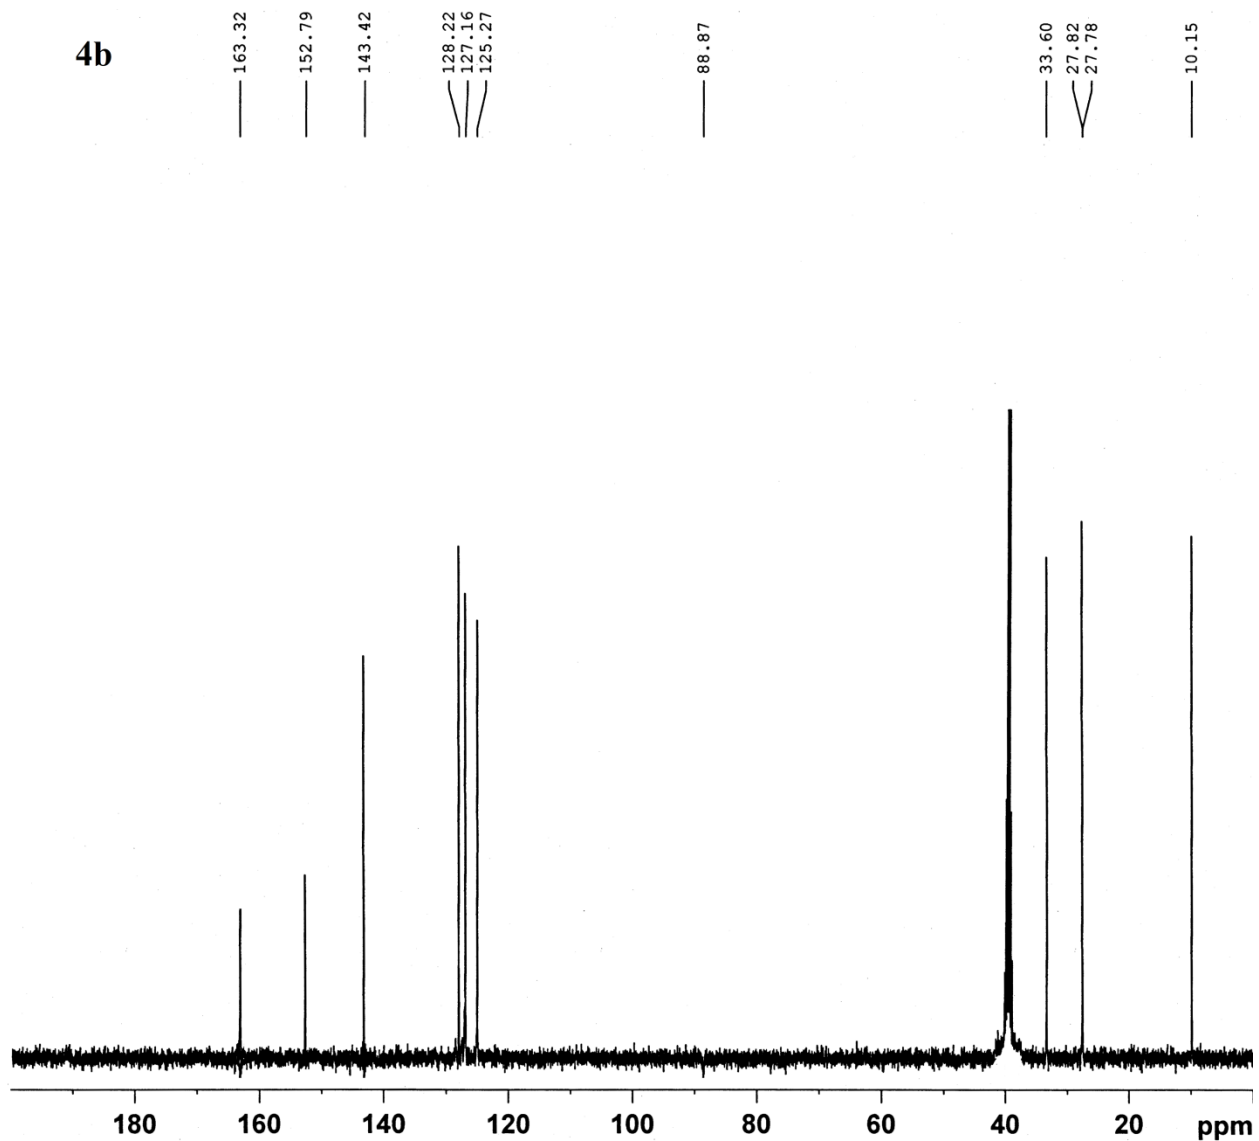

## LC-MS of compound **4c**

Acquired by : Admin  
Sample ID : 19  
Vial# : 19  
Injection Volume : 20  
Data File : JAG-09-AA-52-PURE\_21cd  
Method file : X-BRIDGE\_150\_12min\_AA-FA.lcm

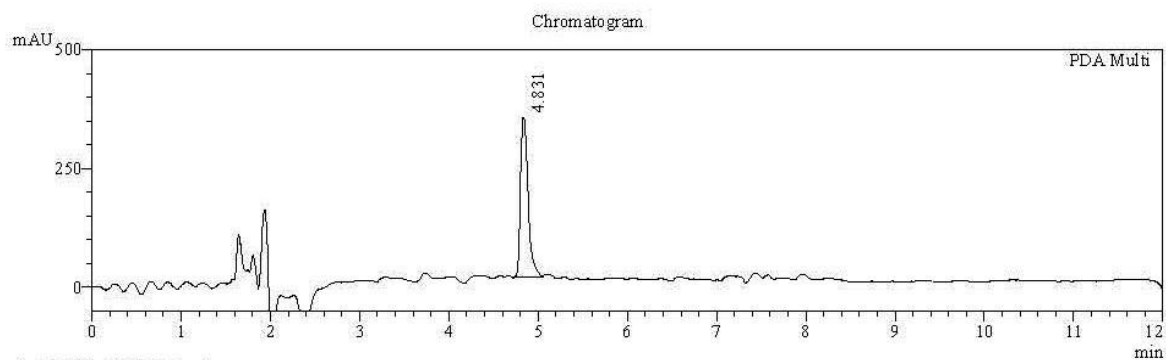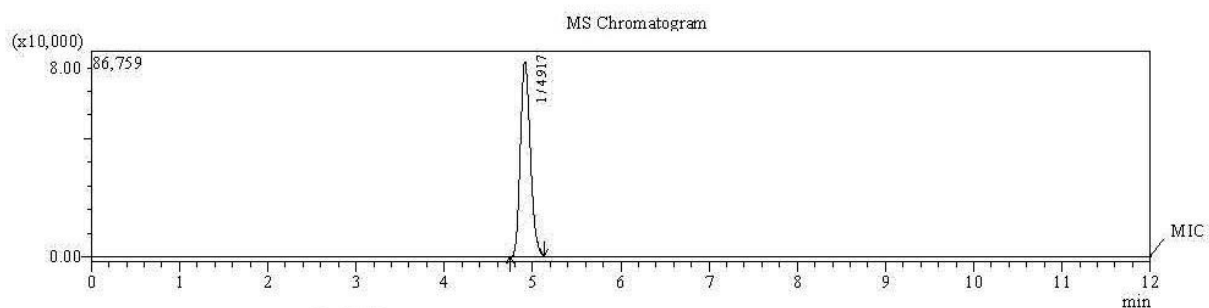

PeakTable

PDA Ch1 202nm 4nm

| Peak# | Ret. Time | Area    | Height | Area%   |
|-------|-----------|---------|--------|---------|
| 1     | 4.831     | 1980348 | 336766 | 100.000 |
| Total |           | 1980348 | 336766 | 100.000 |

MSTABLE MIC1

| Peak# | Ret. Time | Base Peak m/z | Area   | Area%  | Event# |
|-------|-----------|---------------|--------|--------|--------|
| 1     | 4.917     | 338.15        | 647559 | 100.00 | 1-1    |
| Total |           |               | 647559 | 100.00 |        |

MS Spectrum Graph

#1 Ret. Time: Averaged 4.900-4.933(Scan# 295-297)

BG Mode: Calc 4.750<->5.133(286<->309)

Base Peak: 338.15(106016) Polarity: Pos Segment1 - Event1

Intensity

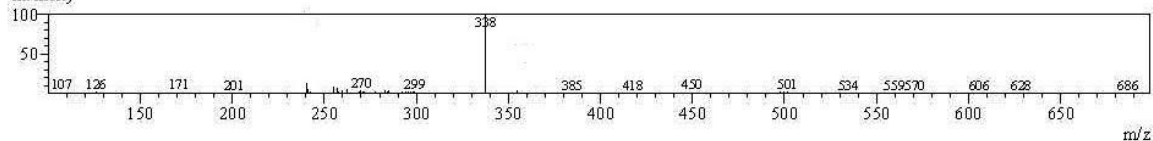

### $^1\text{H}$ NMR of compound **4c**

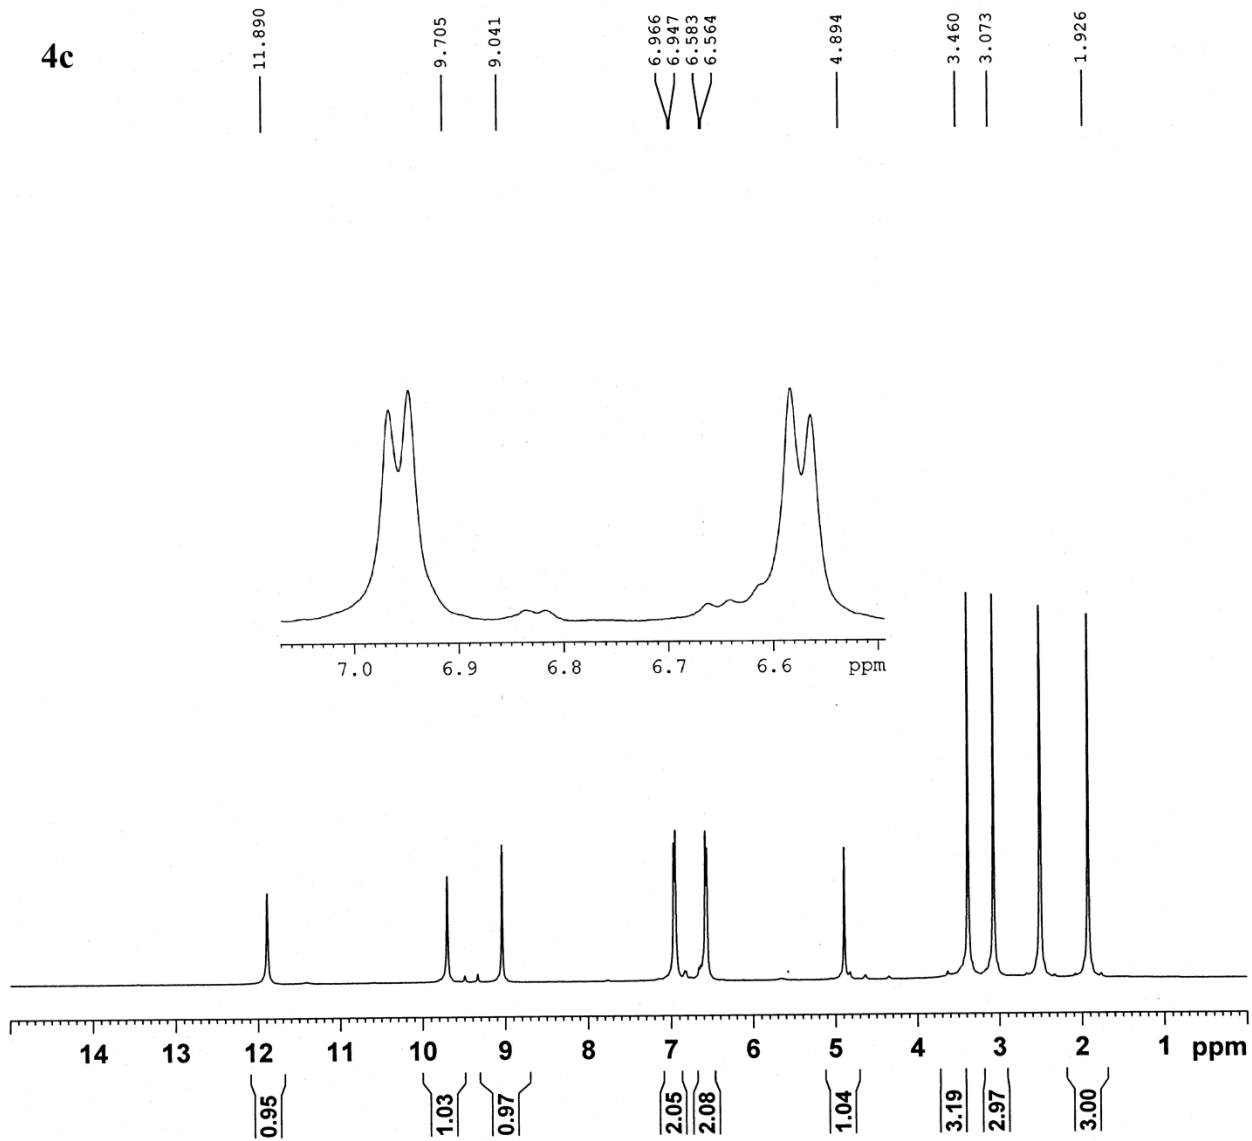

<sup>1</sup>H NMR of compound **4c** (DMSO+D<sub>2</sub>O)

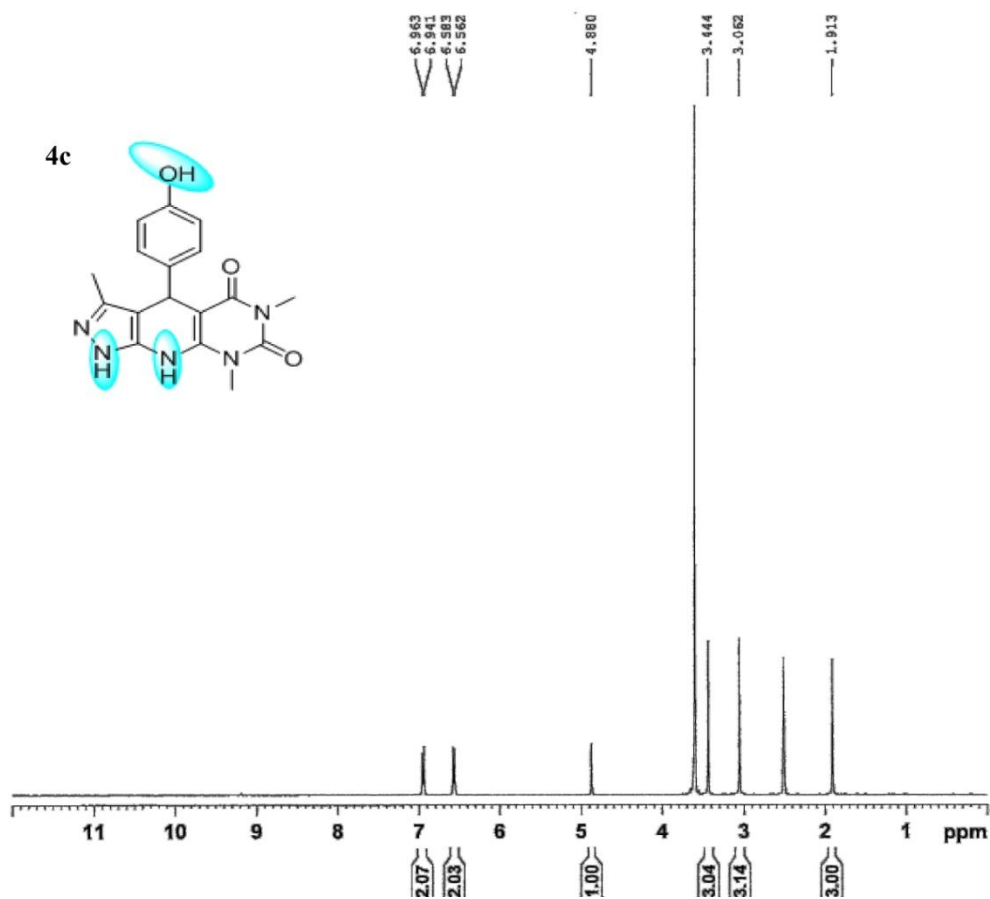

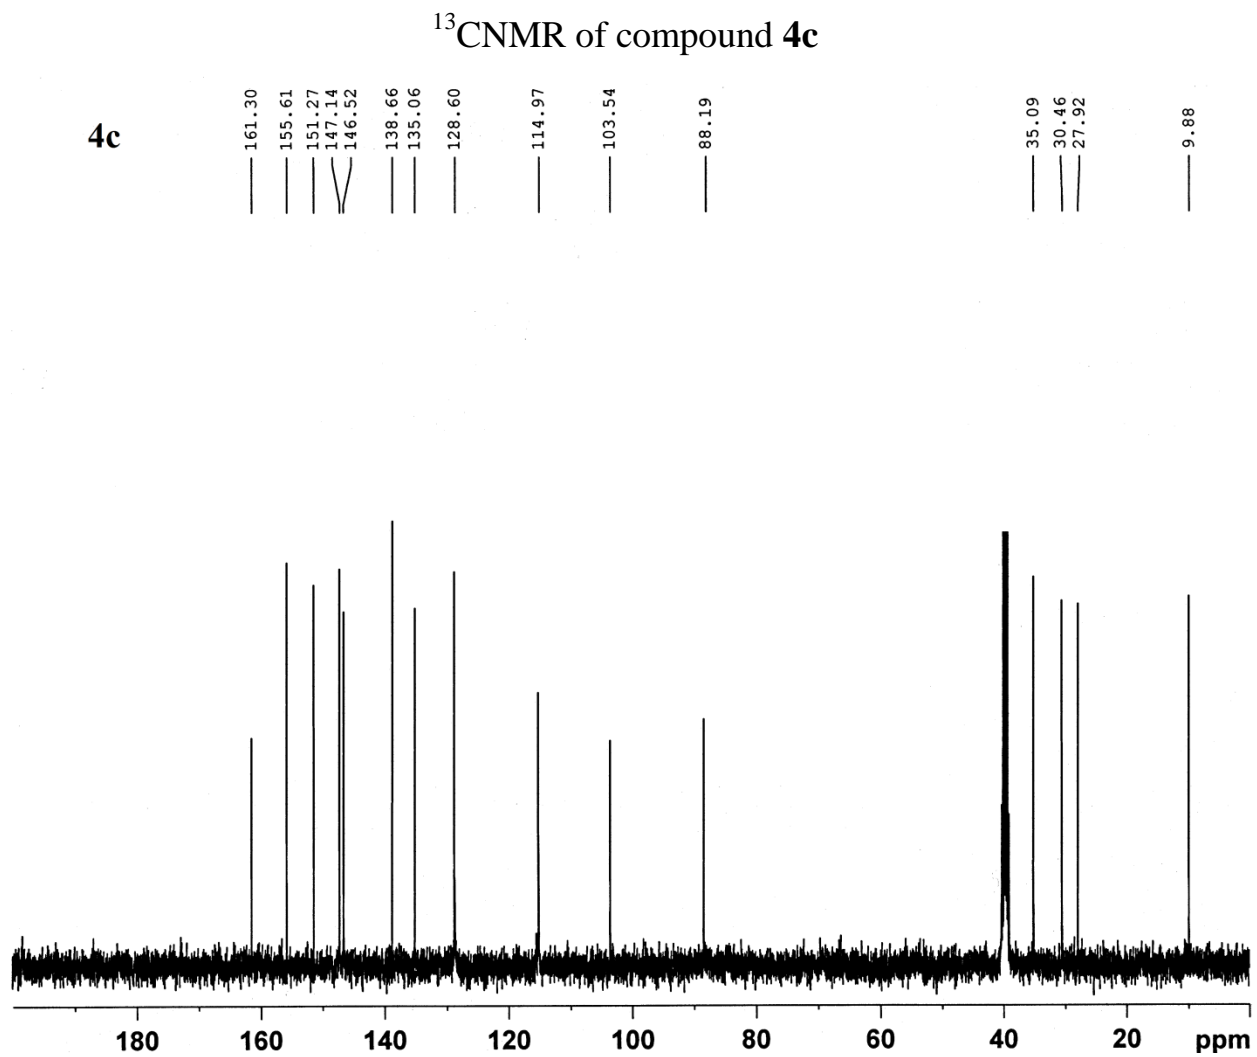

## LC-MS of compound **4d**

Acquired by : Admin  
 Sample ID : 1  
 Vial# : 17  
 Injection Volume : 6  
 Data File : BDX-615-E-46-FINAL001.lcd  
 Method file : GENESIS-LCMS-ESI-150.lcm

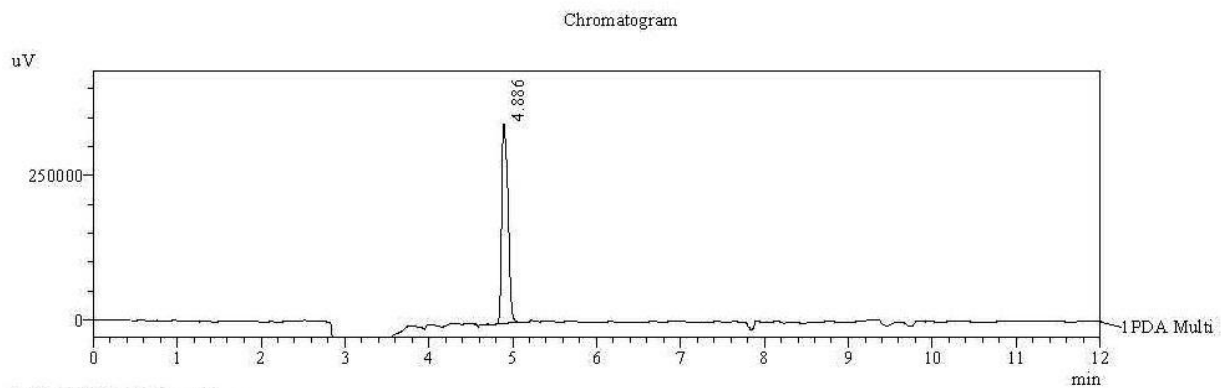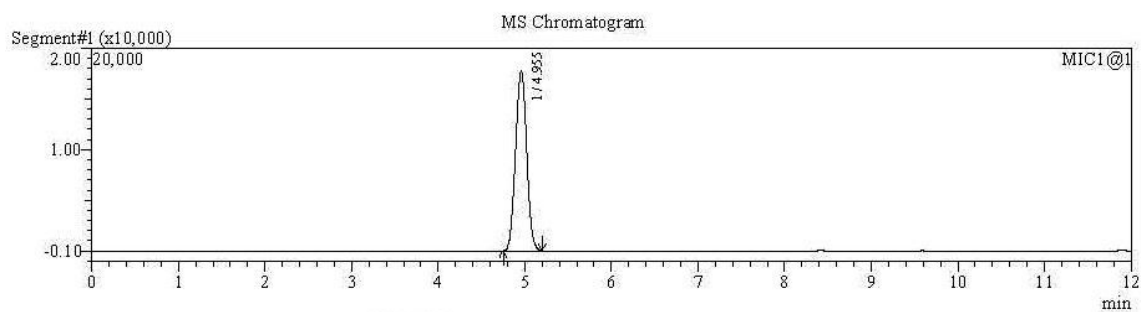

PeakTable

| Peak# | Ret. Time | Area    | Height | Area%   |
|-------|-----------|---------|--------|---------|
| 1     | 4.886     | 1796147 | 344704 | 100.000 |
| Total |           | 1796147 | 344704 | 100.000 |

MSTABLE MIC1

| Peak# | Ret.Time | Base Peak m/z | Area   | Area%  | Event# |
|-------|----------|---------------|--------|--------|--------|
| 1     | 4.955    | 358.54        | 159085 | 100.00 | 1-1    |
| Total |          |               | 159085 | 100.00 |        |

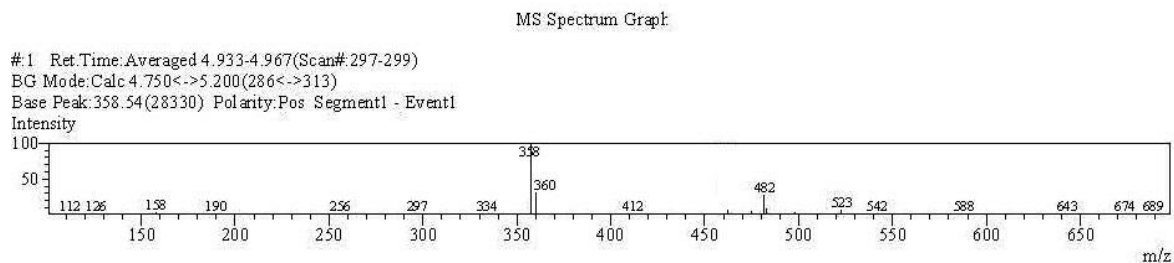



### $^1\text{H}$ NMR of compound **4d**

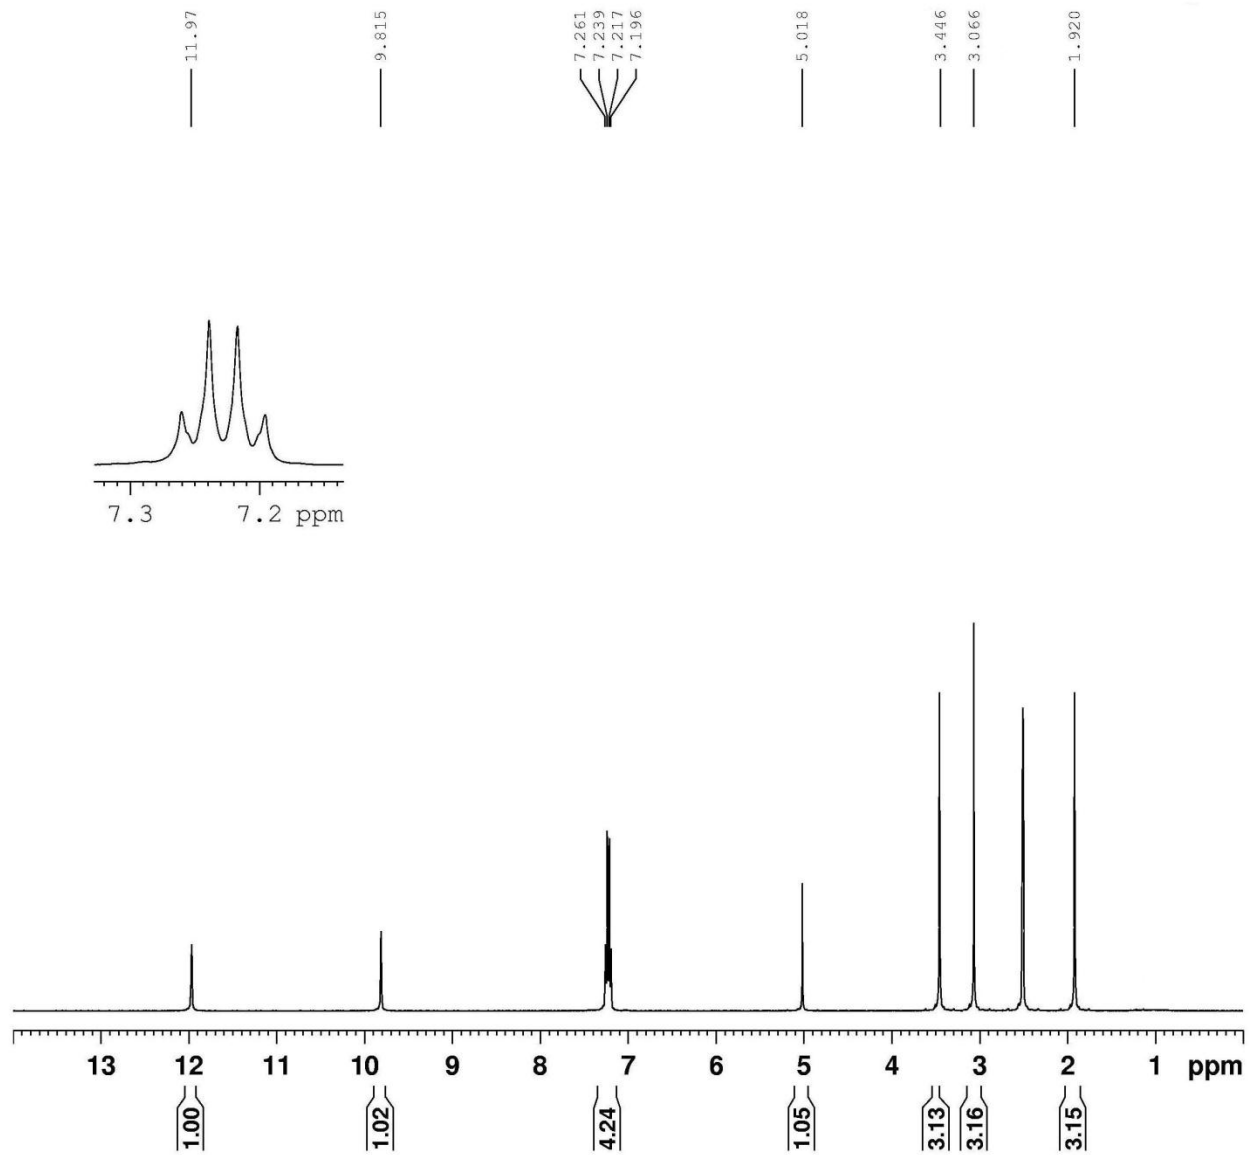

### $^{13}\text{C}$ NMR of compound **4d**

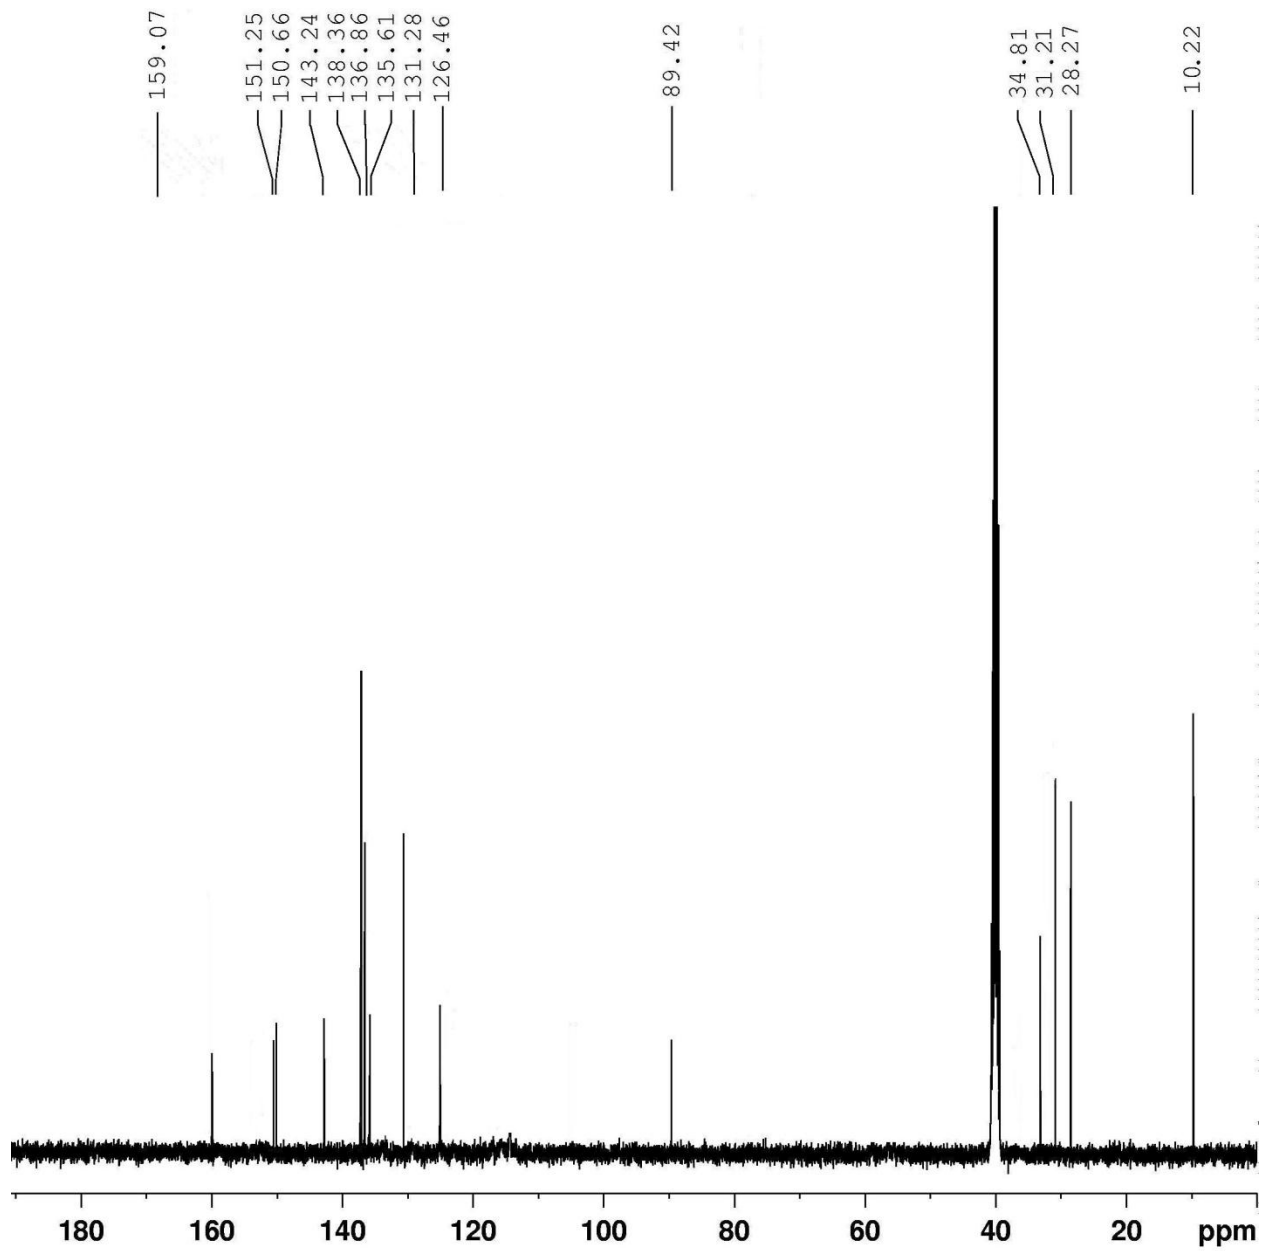

## LC-MS of compound 4e

Acquired by : Admin  
 Sample ID : 4  
 Vial# : 4  
 Injection Volume : 10  
 Data File : BDX-615-E-74-FINAL11.cd  
 Method file : LCMS-ES11cm.

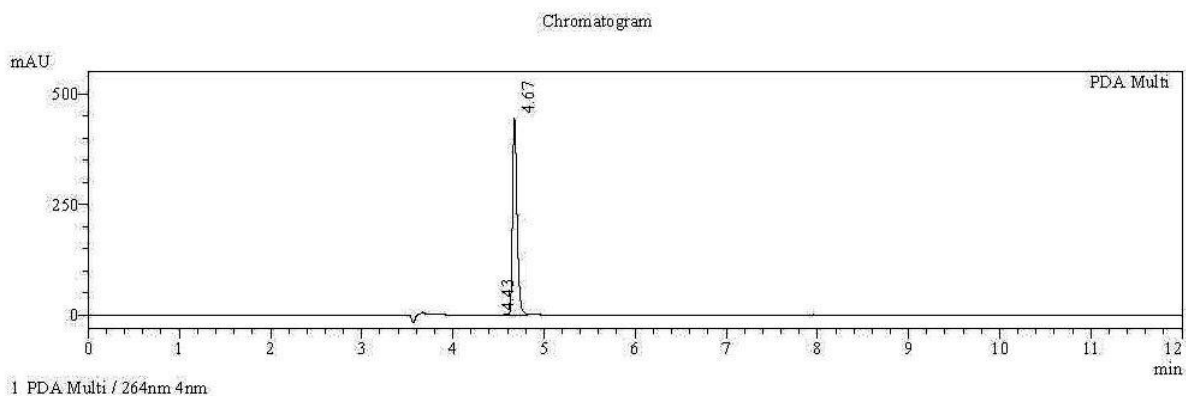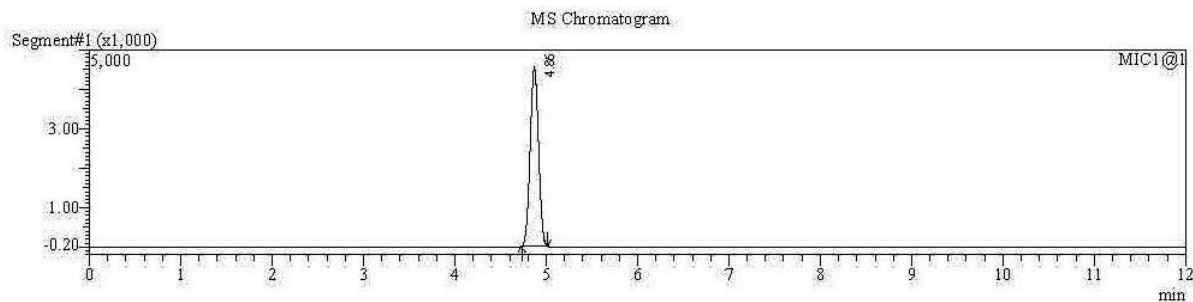

PeakTable

| Peak# | Ret. Time | Area    | Height | Area%  |
|-------|-----------|---------|--------|--------|
| 1     | 4.43      | 1638    | 398    | 0.11   |
| 2     | 4.67      | 1508689 | 445607 | 99.89  |
| Total |           | 1510327 | 446005 | 100.00 |

MSTABLE MIC1

| Peak# | Ret. Time | Base Peak m/z | Area  | Area%  | Event# |
|-------|-----------|---------------|-------|--------|--------|
| 1     | 4.86      | 367.10        | 28856 | 100.00 | 1-1    |
| Total |           |               | 28856 | 100.00 |        |

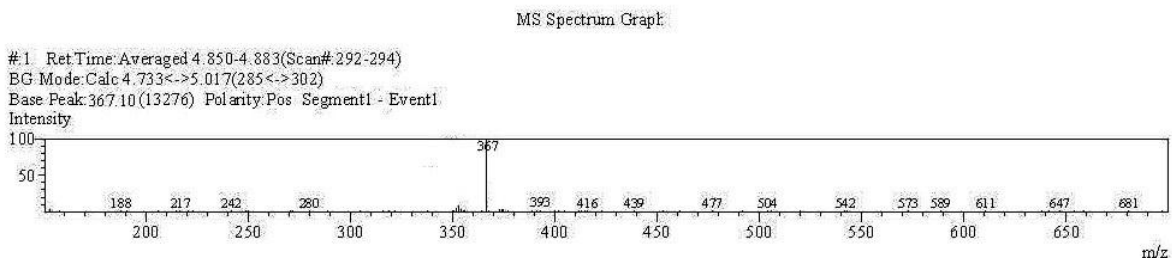

### <sup>1</sup>H NMR of compound 4e

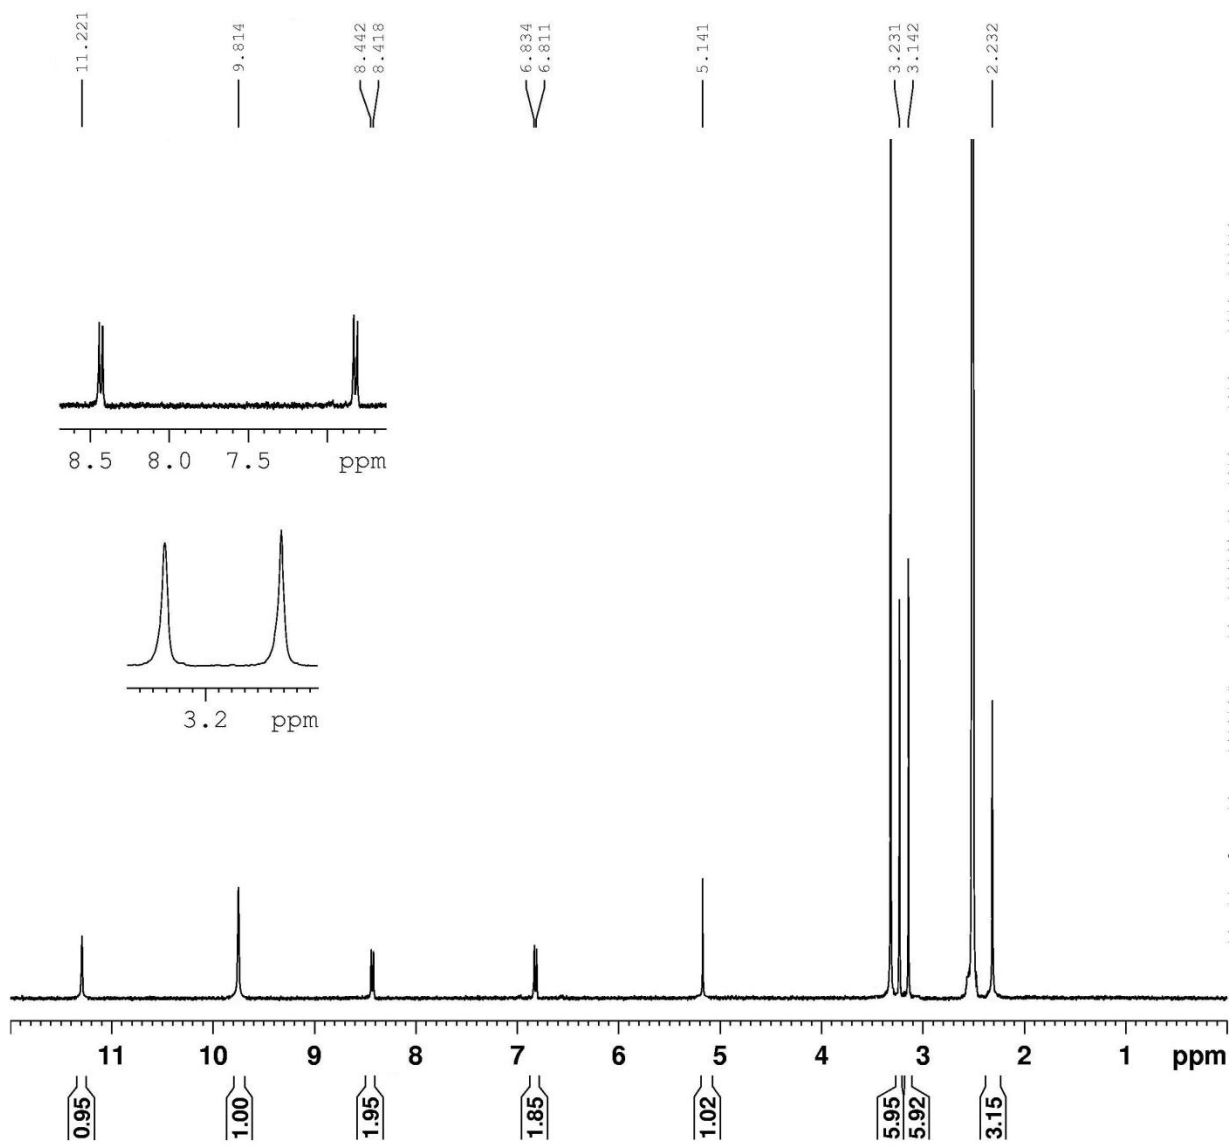

$^{13}\text{C}$ NMR of compound **4e**

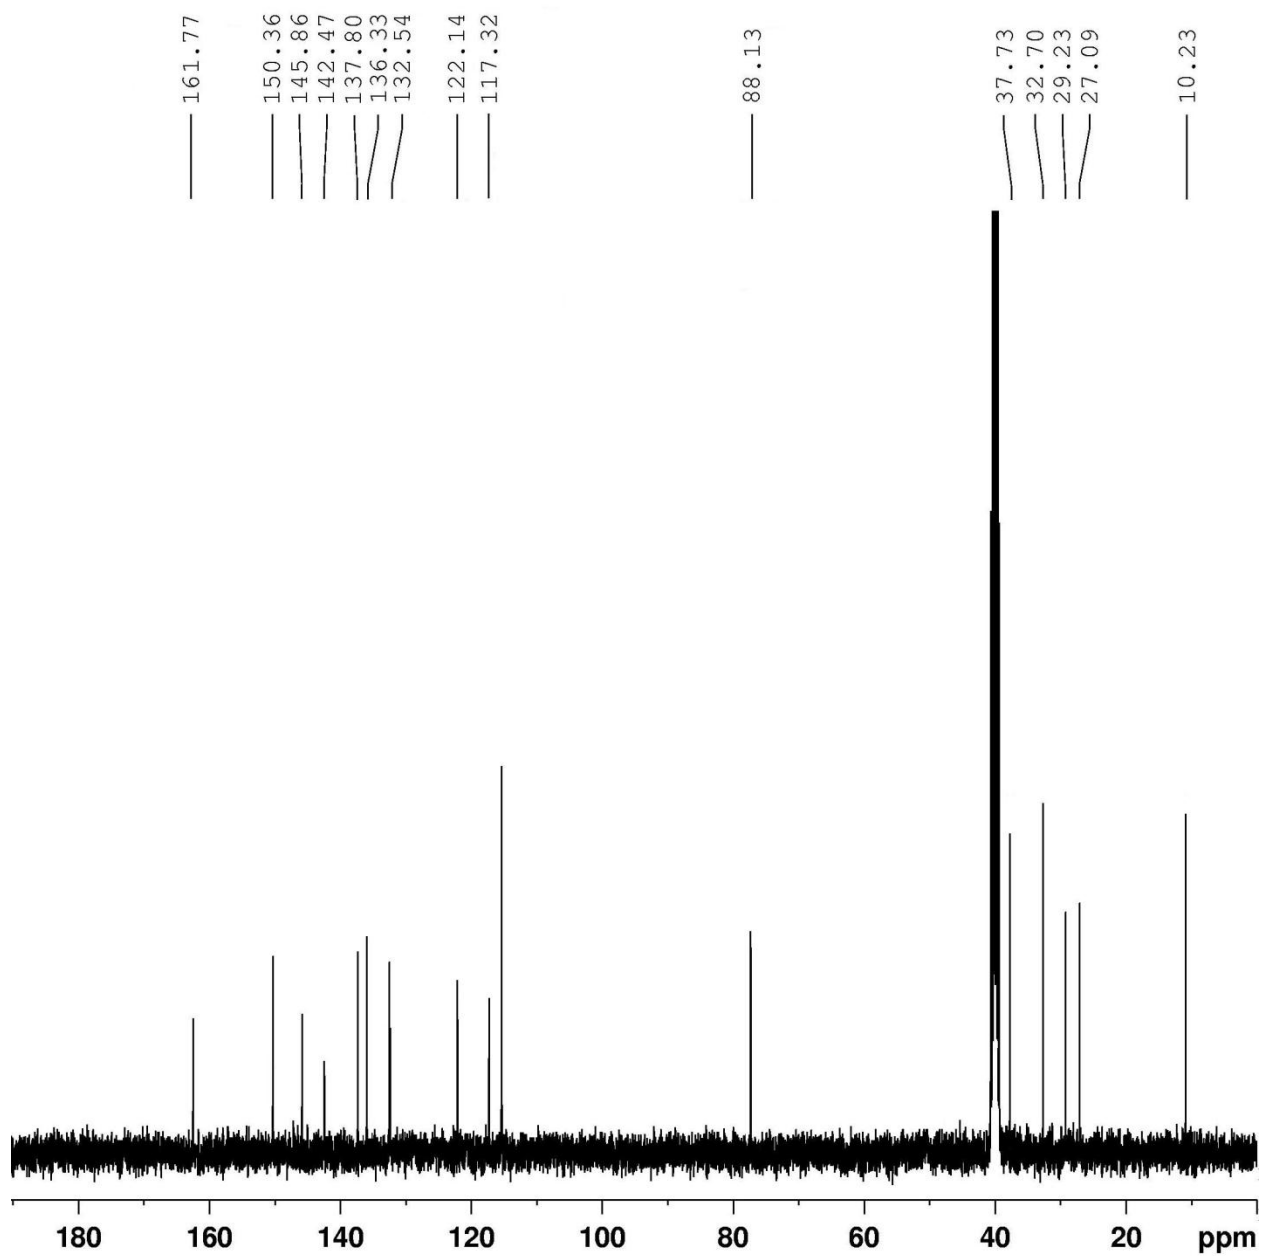

## LC-MS of compound 4f

Acquired by : Admin  
Sample ID : 6  
Vial# : 6  
Injection Volume : 50  
Data File : APX-620-F16-FINAL21cd  
Method file : GENESIS-LCMS-ESI-1501cm

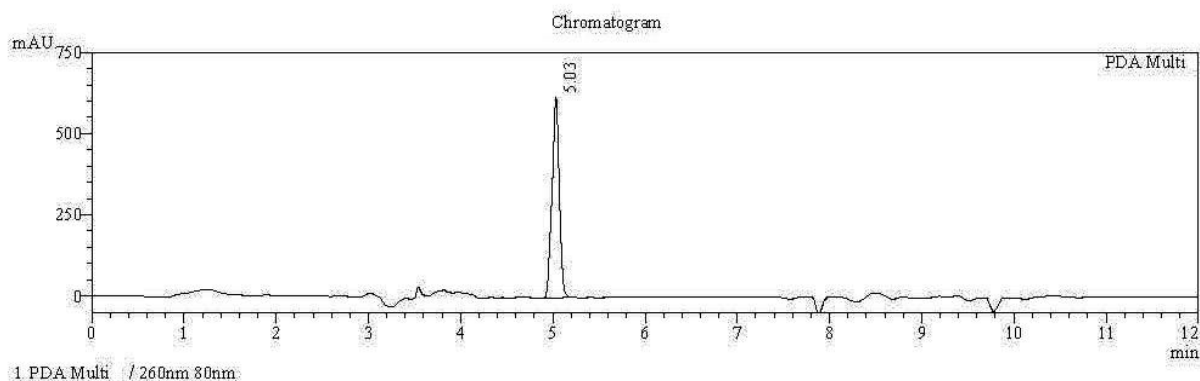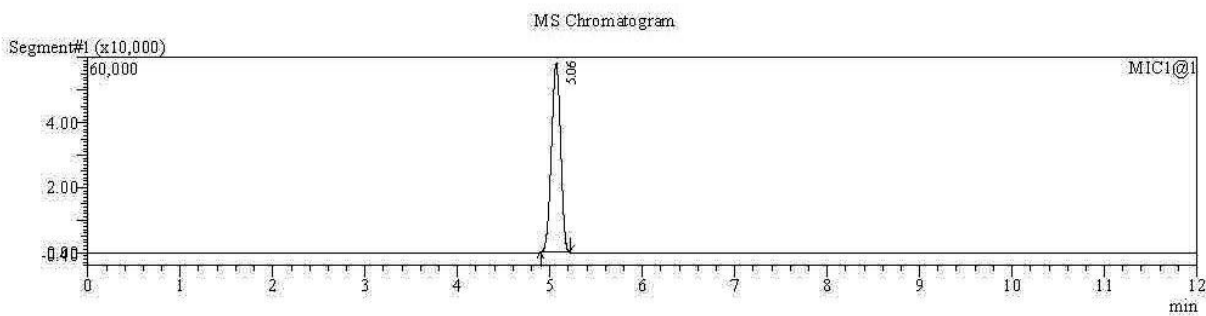

PeakTable

PDA Ch2 260nm 80nm

| Peak# | Ret. Time | Area    | Height | Area%  |
|-------|-----------|---------|--------|--------|
| 1     | 5.03      | 3356674 | 615964 | 100.00 |
| Total |           | 3356674 | 615964 | 100.00 |

MSTABLE MIC1

| Peak# | Ret Time | Base Peak m/z | Area   | Area%  | Event# |
|-------|----------|---------------|--------|--------|--------|
| 1     | 5.06     | 401.85        | 402452 | 100.00 | 1-1    |
| Total |          |               | 402452 | 100.00 |        |

MS Spectrum Graph

#1 Ret Time: Averaged 5.050-5.083 (Scan# 304-306)

EG Mode: Calc 4.900 <-> 5.217 (295 <-> 314)

Base Peak: 401.85 (70486) Polarity: Pos Segment1 - Event1

Intensity

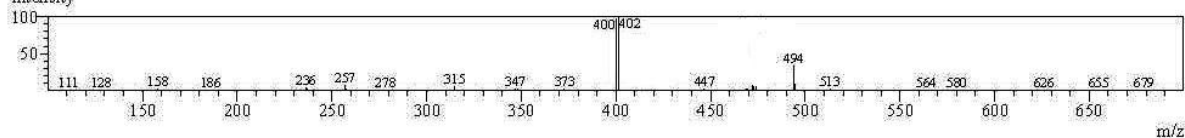

### $^1\text{H}$ NMR of compound **4f**

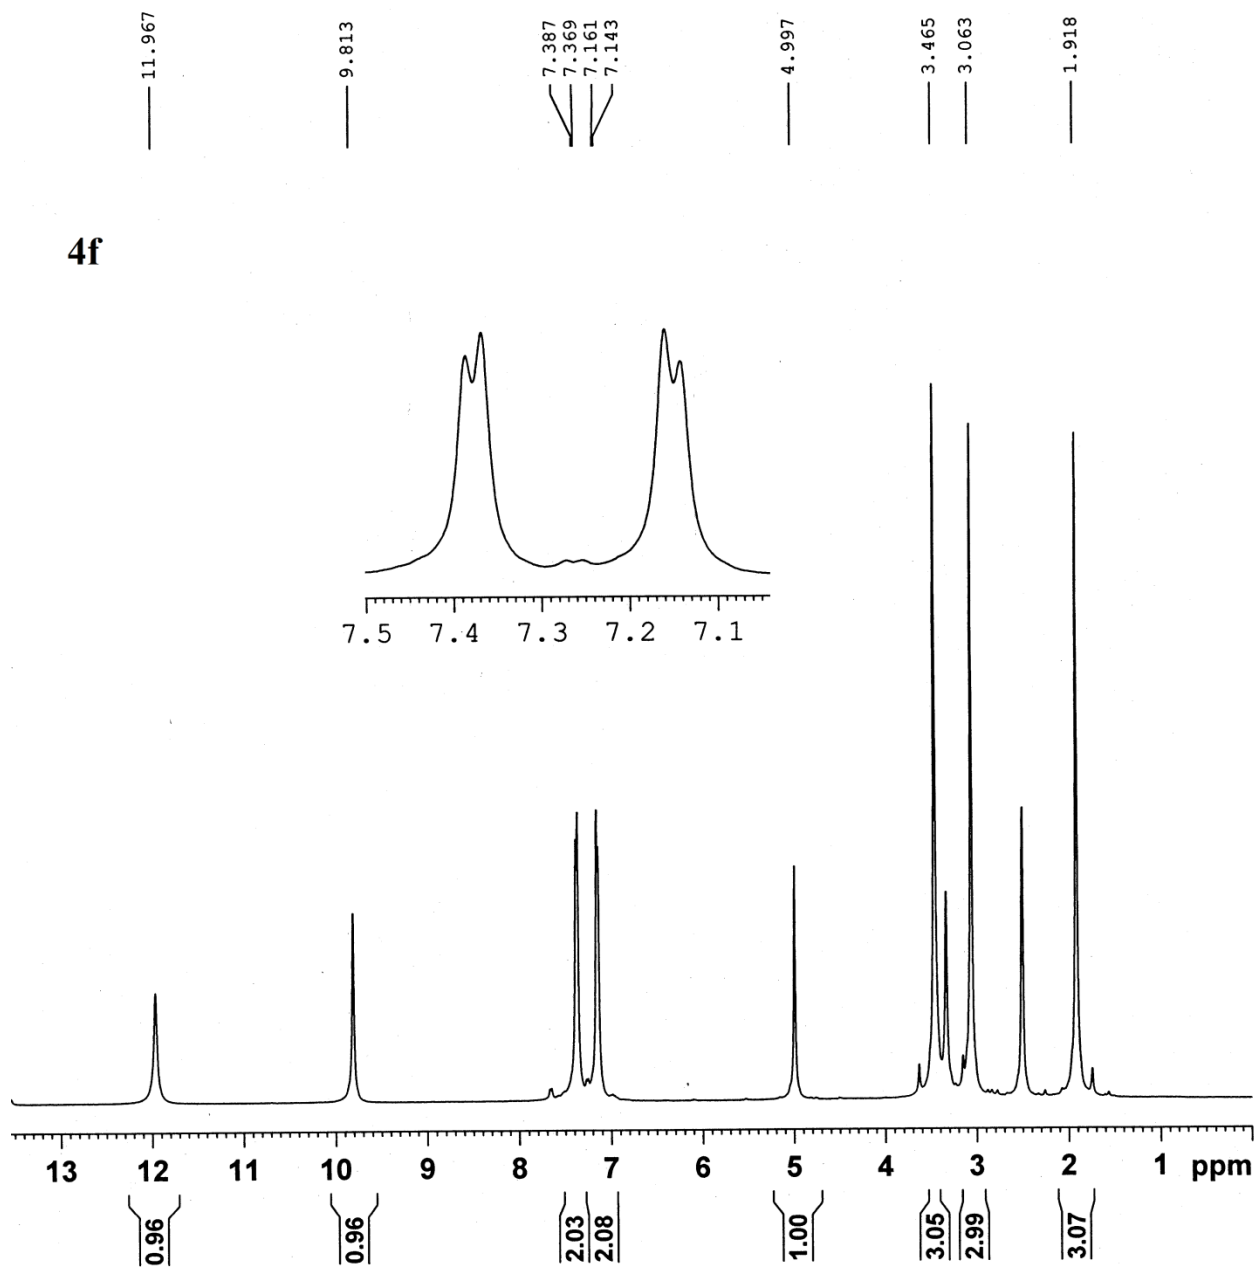

### $^{13}\text{C}$ NMR of compound **4f**

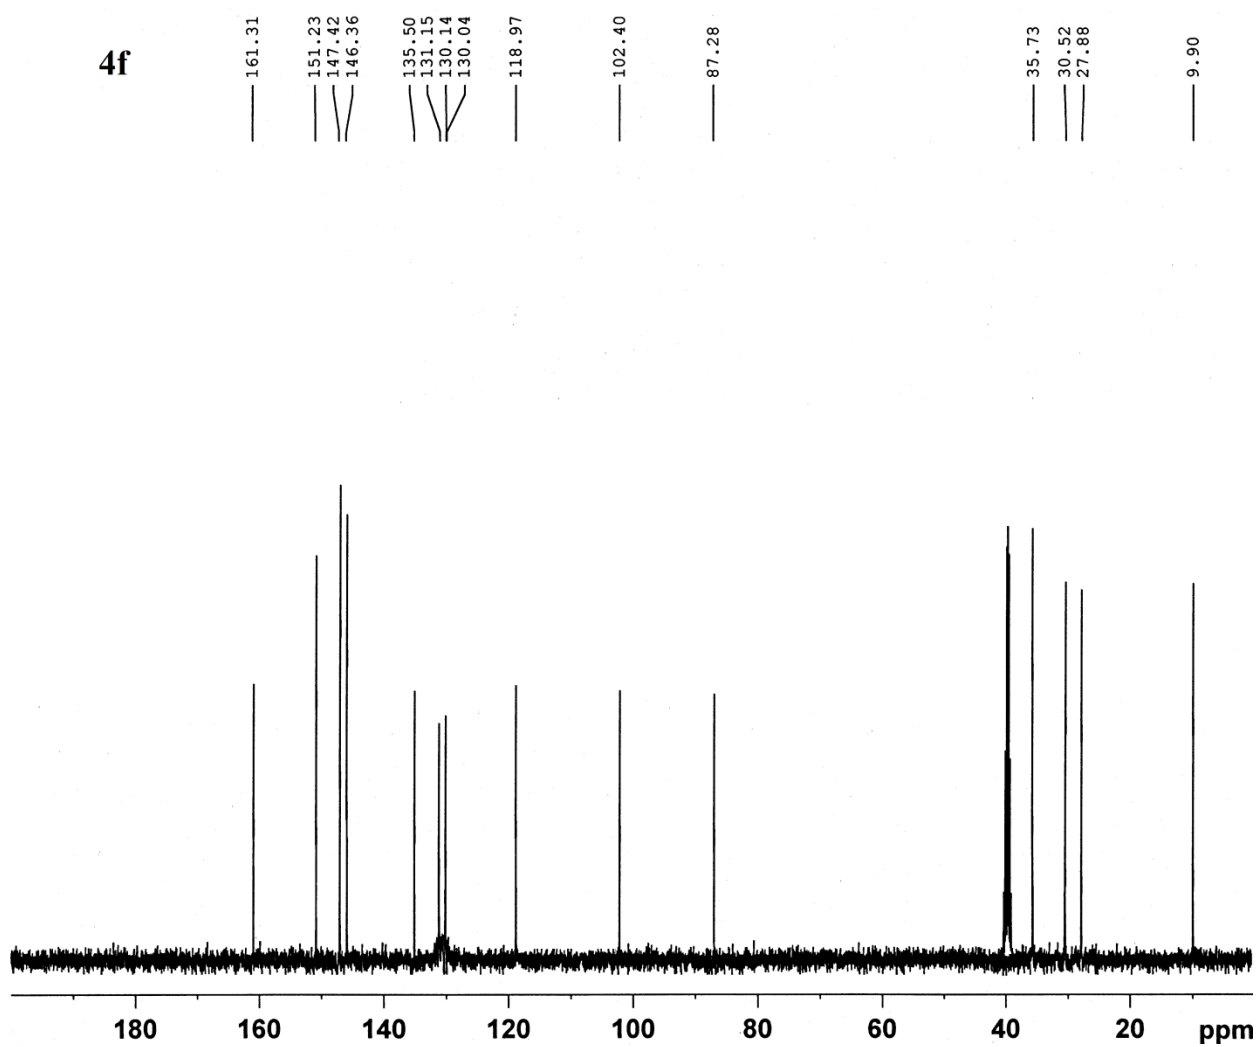



## LC-MS of compound 4g

Acquired by : Admin  
 Sample ID : 18  
 Vial# : 18  
 Injection Volume : 10  
 Data File : JAG-1-5-3-44.lcd  
 Method file : X-BRIDGE\_150\_12min\_AA-FA.lcm

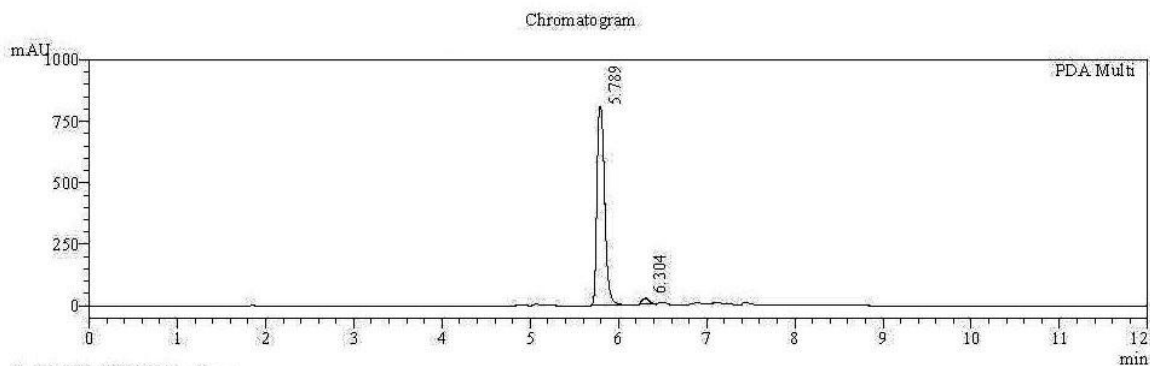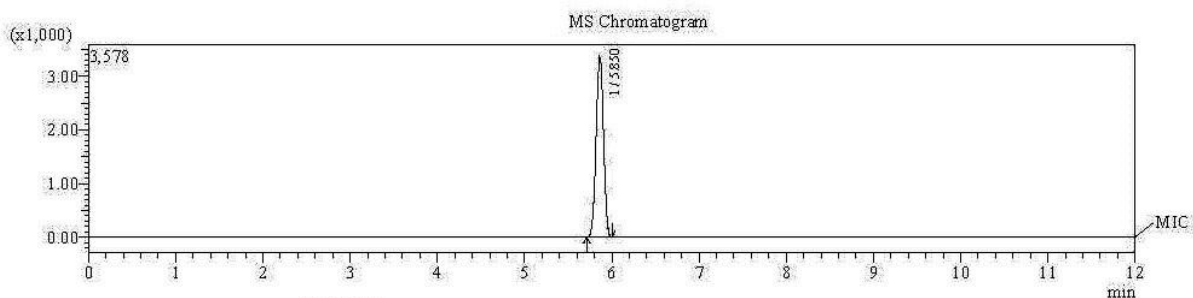

PeakTable

| Peak# | Ret. Time | Area    | Height | Area%   |
|-------|-----------|---------|--------|---------|
| 1     | 5.789     | 4875342 | 809860 | 97.434  |
| 2     | 6.304     | 128408  | 22816  | 2.566   |
| Total |           | 5003750 | 832676 | 100.000 |

MSTABLE MIC1

| Peak# | Ret.Time | Base Peak m/z | Area  | Area%  | Event# |
|-------|----------|---------------|-------|--------|--------|
| 1     | 5.850    | 369.15        | 19898 | 100.00 | 1-1    |
| Total |          |               | 19898 | 100.00 |        |

### MS Spectrum Graph

#1 Ret.Time: Averaged 5.833-5.867(Scan# 351-353)

BG Mode: Calc 5.717<->6.000(344<->361)

Base Peak: 369.15(27763) Polarity: Pos Segment1 - Event1

Intensity

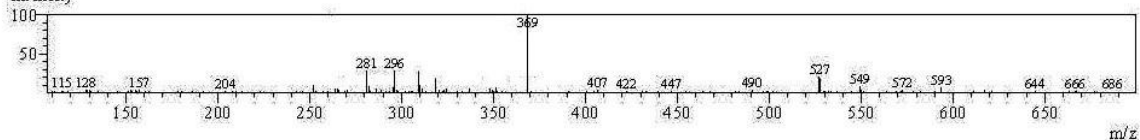

### $^1\text{H}$ NMR of compound **4g**

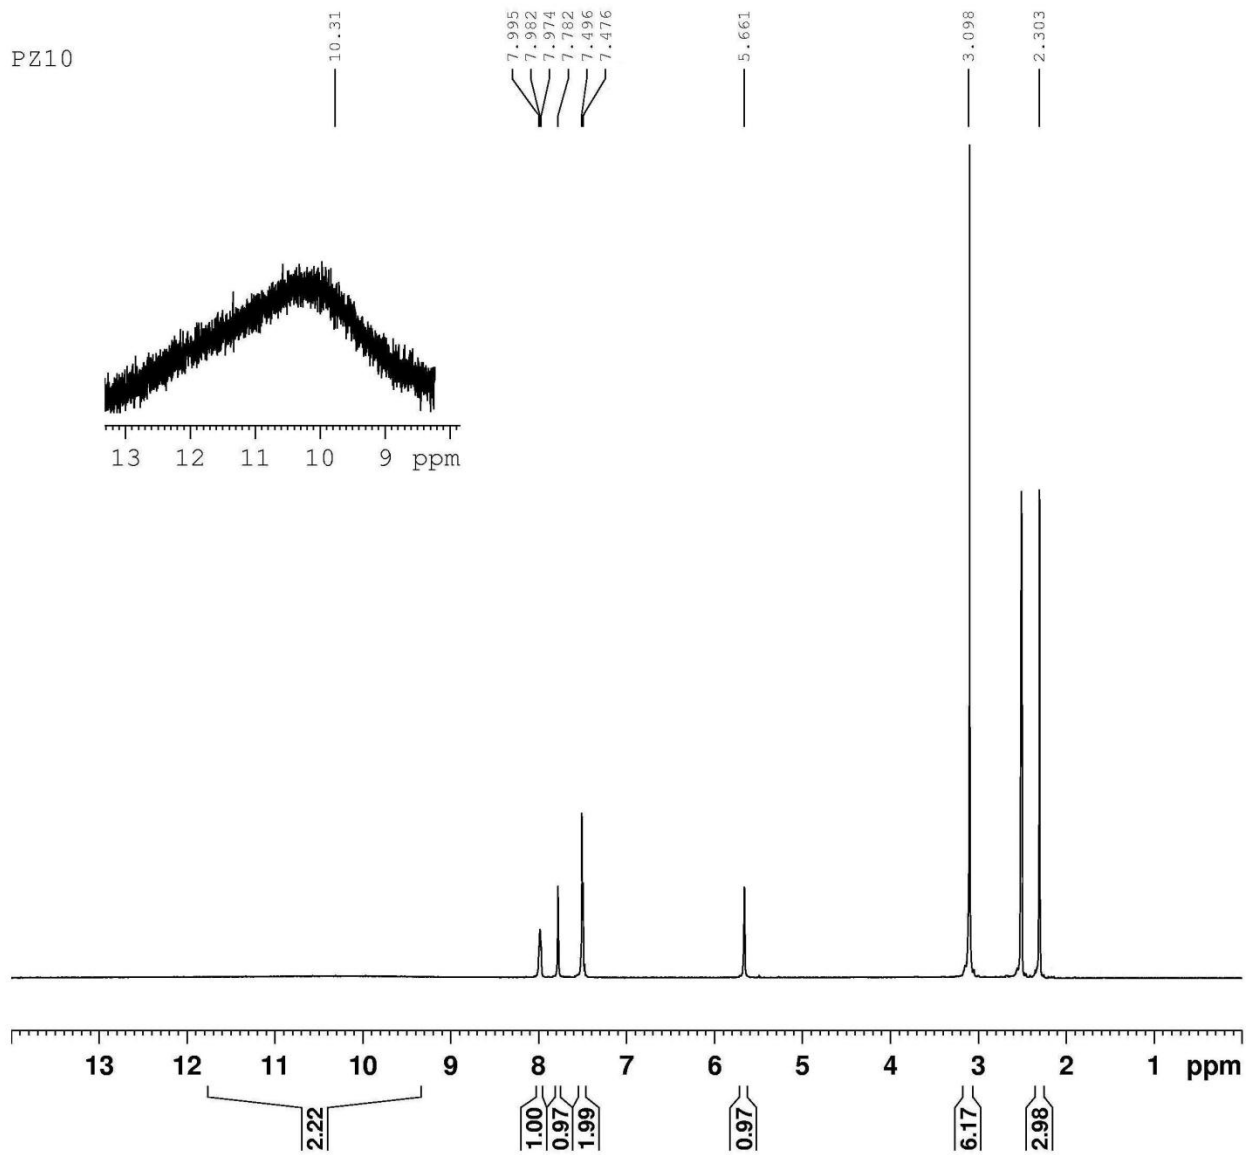

$^{13}\text{C}$ NMR of compound **4g**

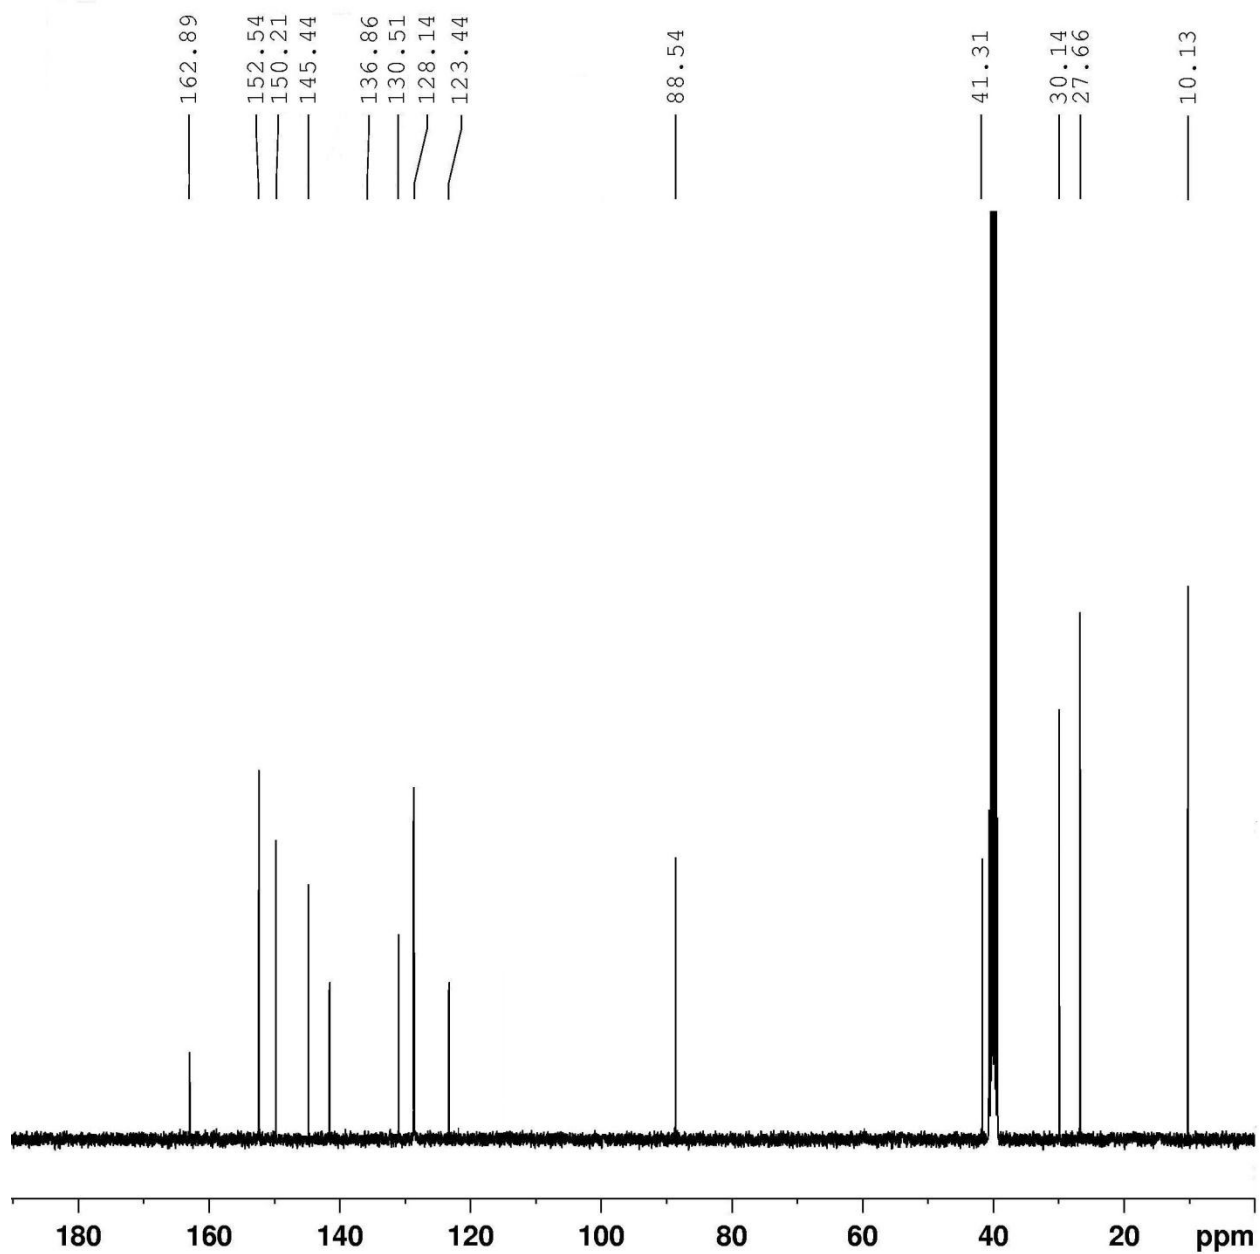

## LC-MS of compound 4h

Acquired by : Admin  
 Sample ID : O2Hr  
 Vial# : 19  
 Injection Volume : 10  
 Data File : OST-J-13-70-3-59\_11.cd  
 Method file : X-BRIDGE\_150\_12min\_AA-FA.lcm

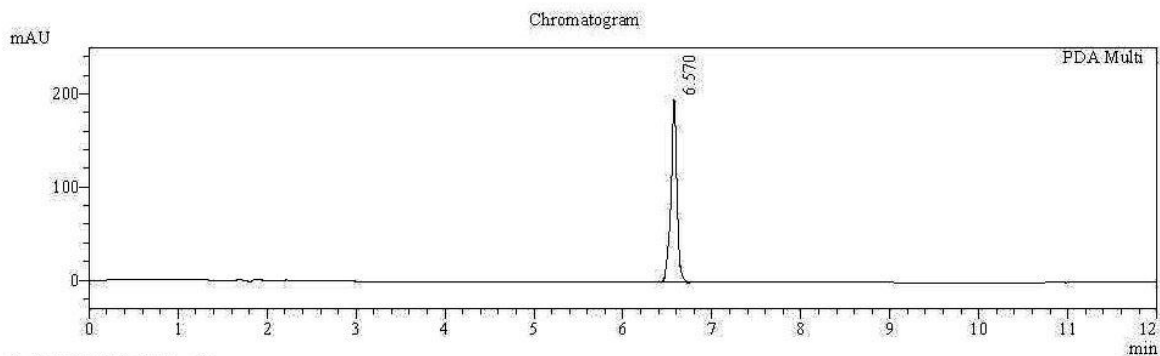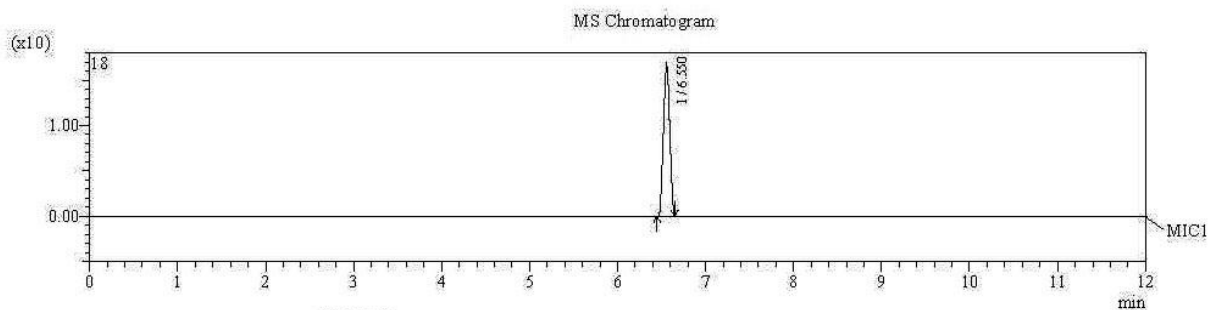

PeakTable

| Peak# | Ret. Time | Area   | Height | Area%   |
|-------|-----------|--------|--------|---------|
| 1     | 6.570     | 917581 | 195821 | 100.000 |
| Total |           | 917581 | 195821 | 100.000 |

MSTABLE MIC1

| Peak# | Ret. Time | Base Peak m/z | Area | Area%  | Event# |
|-------|-----------|---------------|------|--------|--------|
| 1     | 6.550     | 325.65        | 83   | 100.00 | 1-1    |
| Total |           |               | 83   | 100.00 |        |

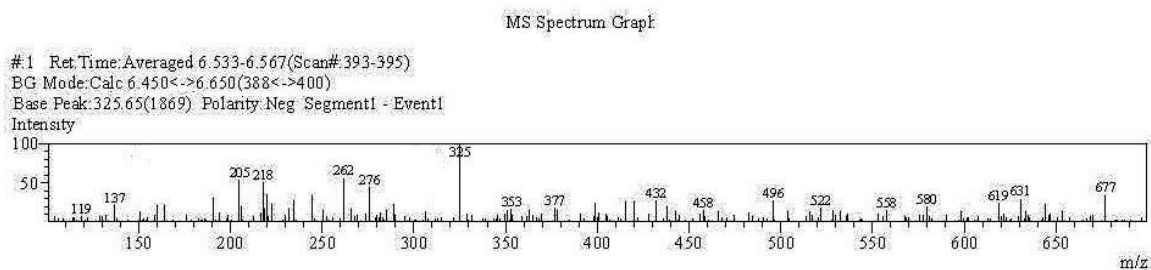

### $^1\text{H}$ NMR of compound **4h**

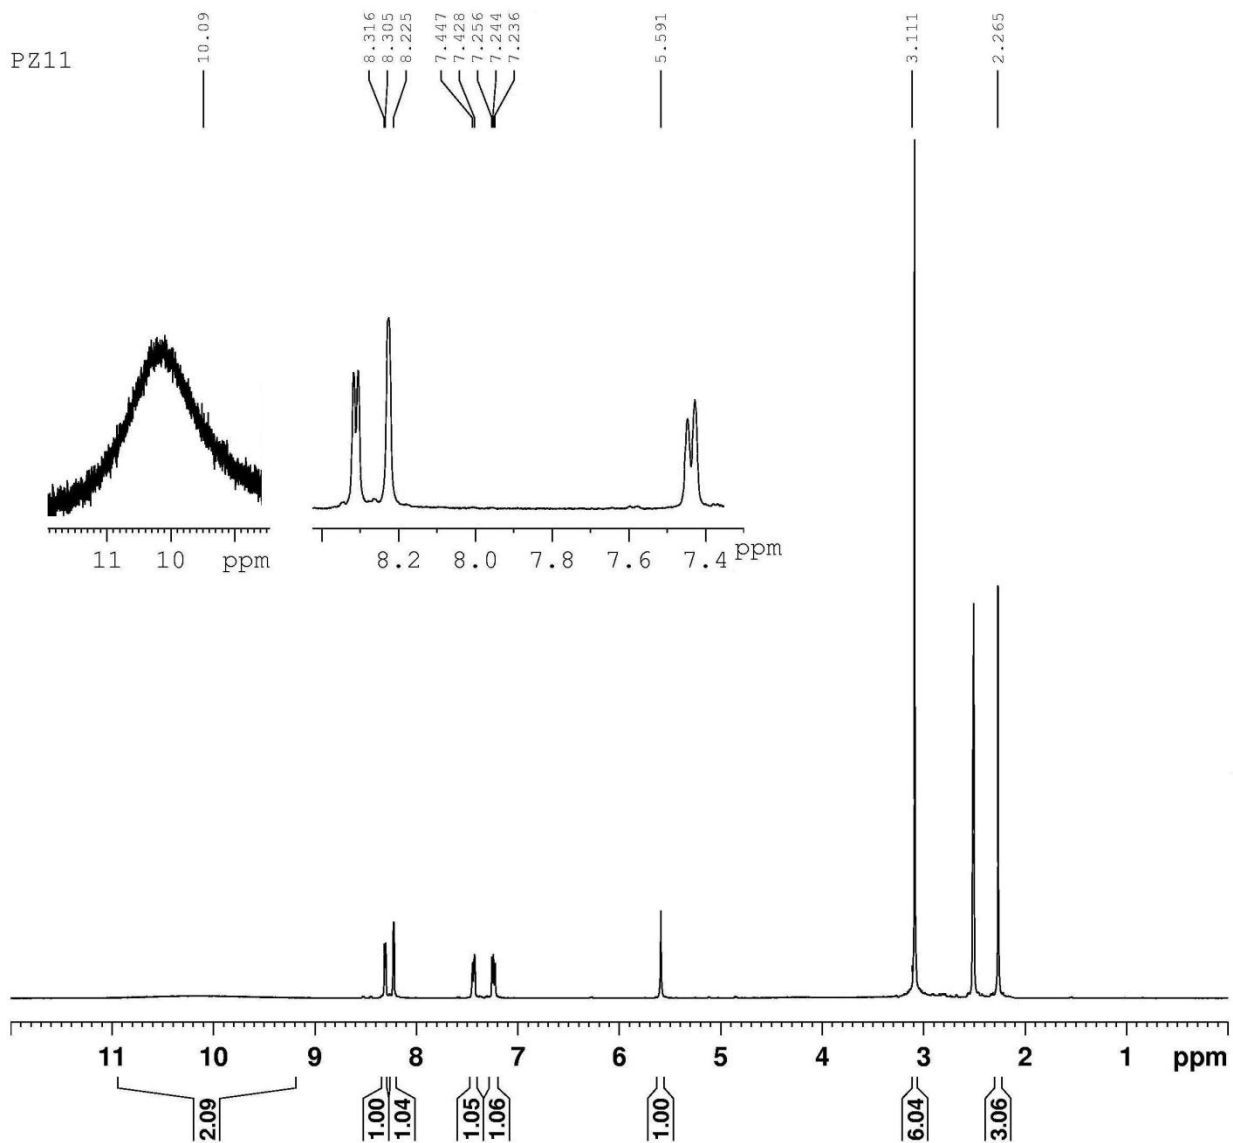

### $^{13}\text{C}$ NMR of compound **4h**

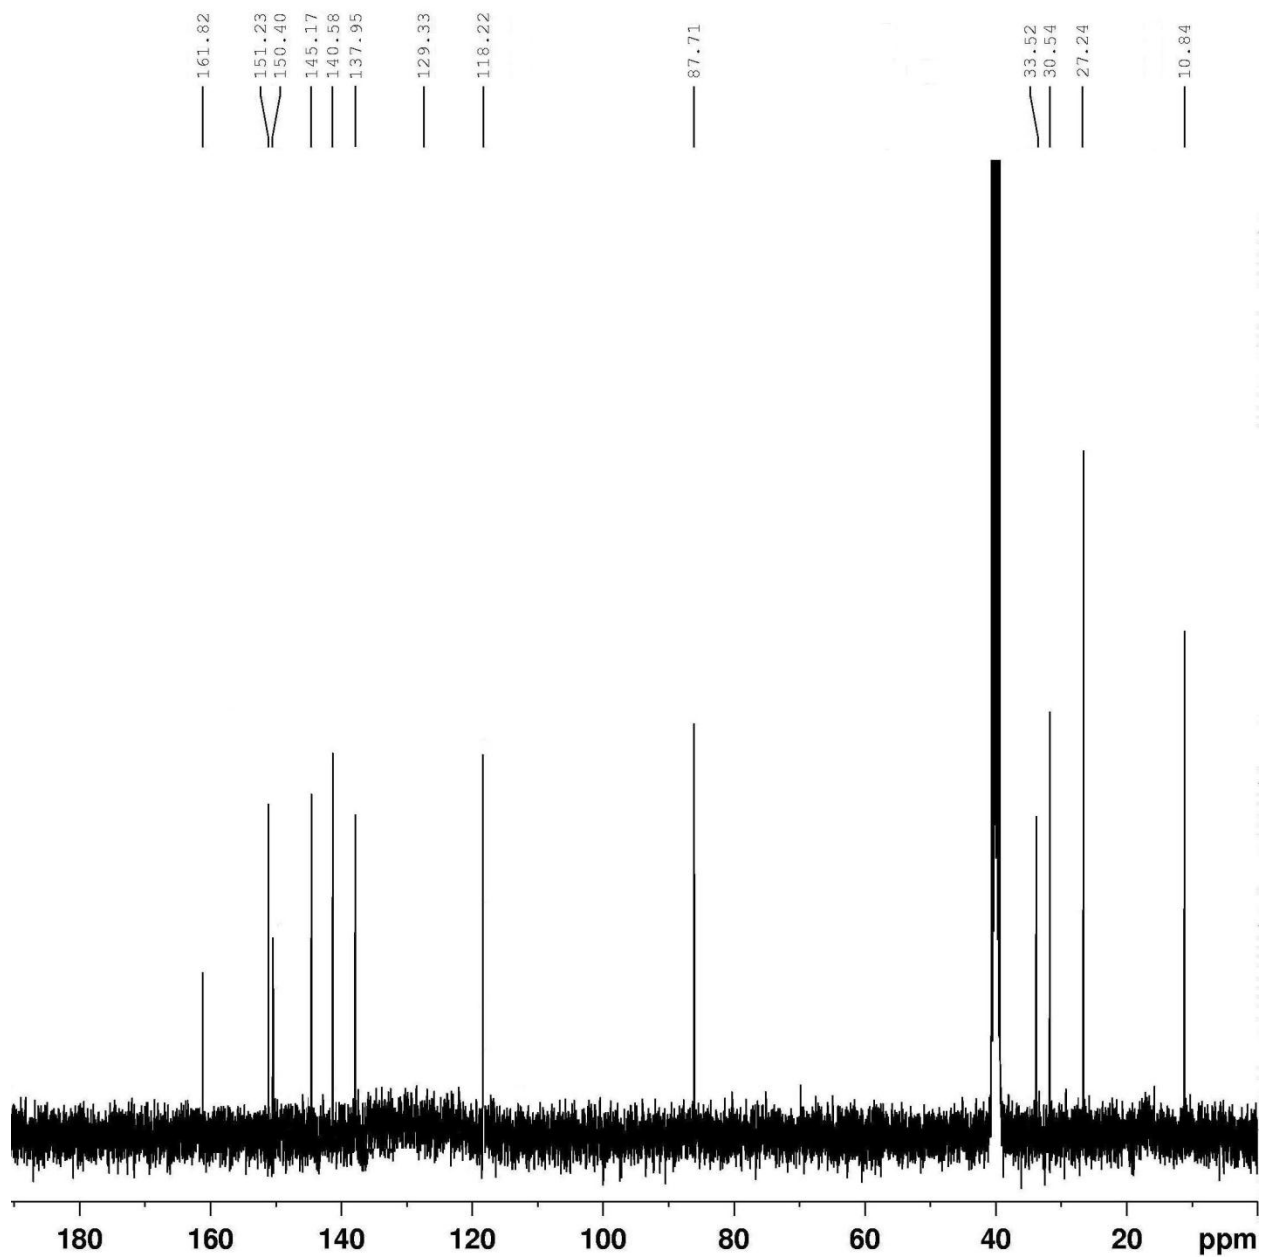

## LC-MS of compound 4i

Acquired by : Admin  
 Sample ID : 17  
 Vial# : 17  
 Injection Volume : 10  
 Data File : OST-J-14-89-ST-5-147.lcd  
 Method file : X-BRIDGE\_150\_12min\_AA-FA.lcm

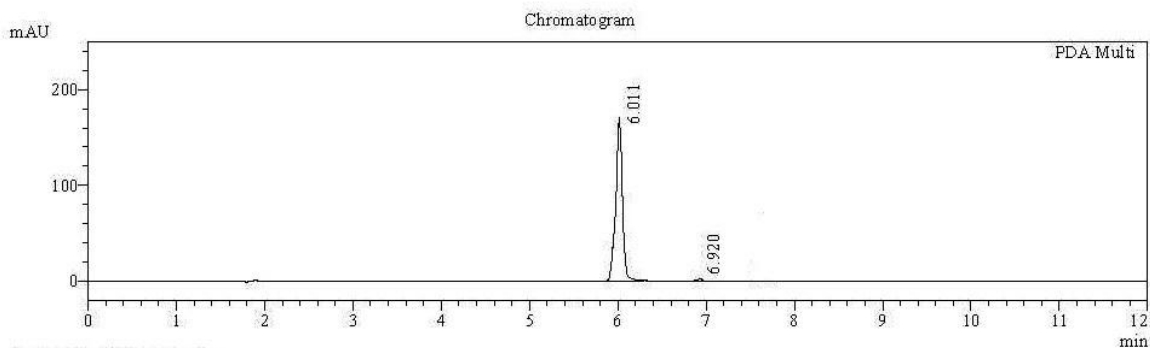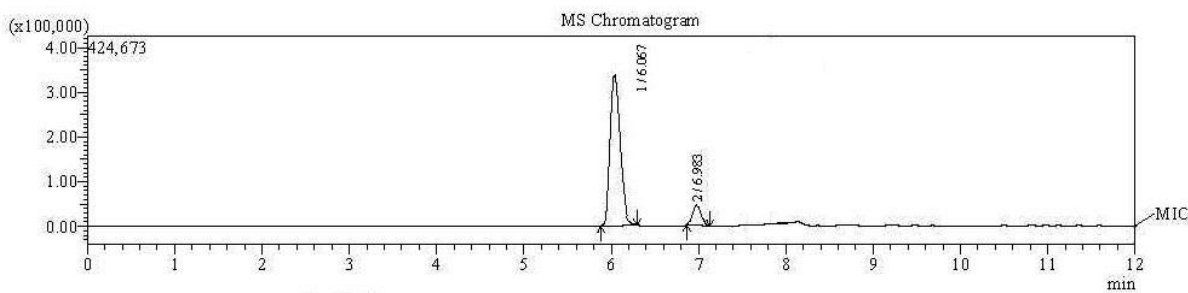

PeakTable

| Peak# | Ret. Time | Area    | Height | Area%   |
|-------|-----------|---------|--------|---------|
| 1     | 6.011     | 895599  | 192939 | 99.095  |
| 2     | 6.920     | 9143    | 2193   | 0.905   |
| Total |           | 1010833 | 195132 | 100.000 |

MSTABLE MIC1

| Peak# | Ret. Time | Base Peak m/z | Area    | Area%  | Event# |
|-------|-----------|---------------|---------|--------|--------|
| 1     | 6.067     | 393.40        | 5300803 | 94.50  | 1-1    |
| 2     | 6.983     | 272.20        | 308269  | 5.50   | 1-1    |
| Total |           |               | 5609072 | 100.00 |        |

### MS Spectrum Graph

#1 Ret. Time: Averaged 6.050-6.083 (Scan#: 364-366)  
 BG Mode: Calc 5.883<->6.300 (354<->379)  
 Base Peak: 393.40 (205644) Polarity: Pos Segment1 - Event1

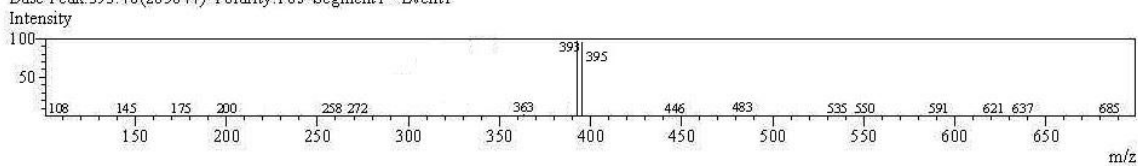

#2 Ret. Time: Averaged 6.967-7.000 (Scan#: 419-421)  
 BG Mode: Calc 6.867<->7.133 (413<->429)  
 Mass Peaks: 282 Base Peak: 272.20 (62307) Polarity: Pos Segment1 - Event1

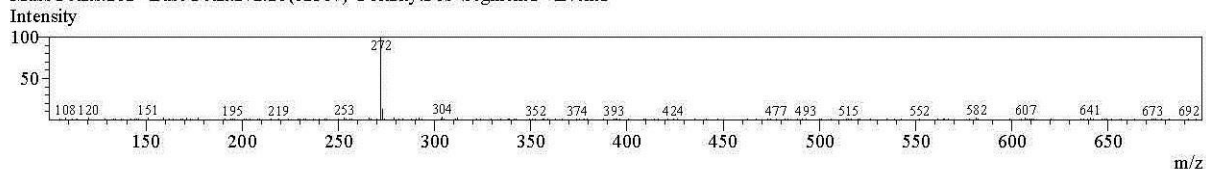

### $^1\text{H}$ NMR of compound **4i**

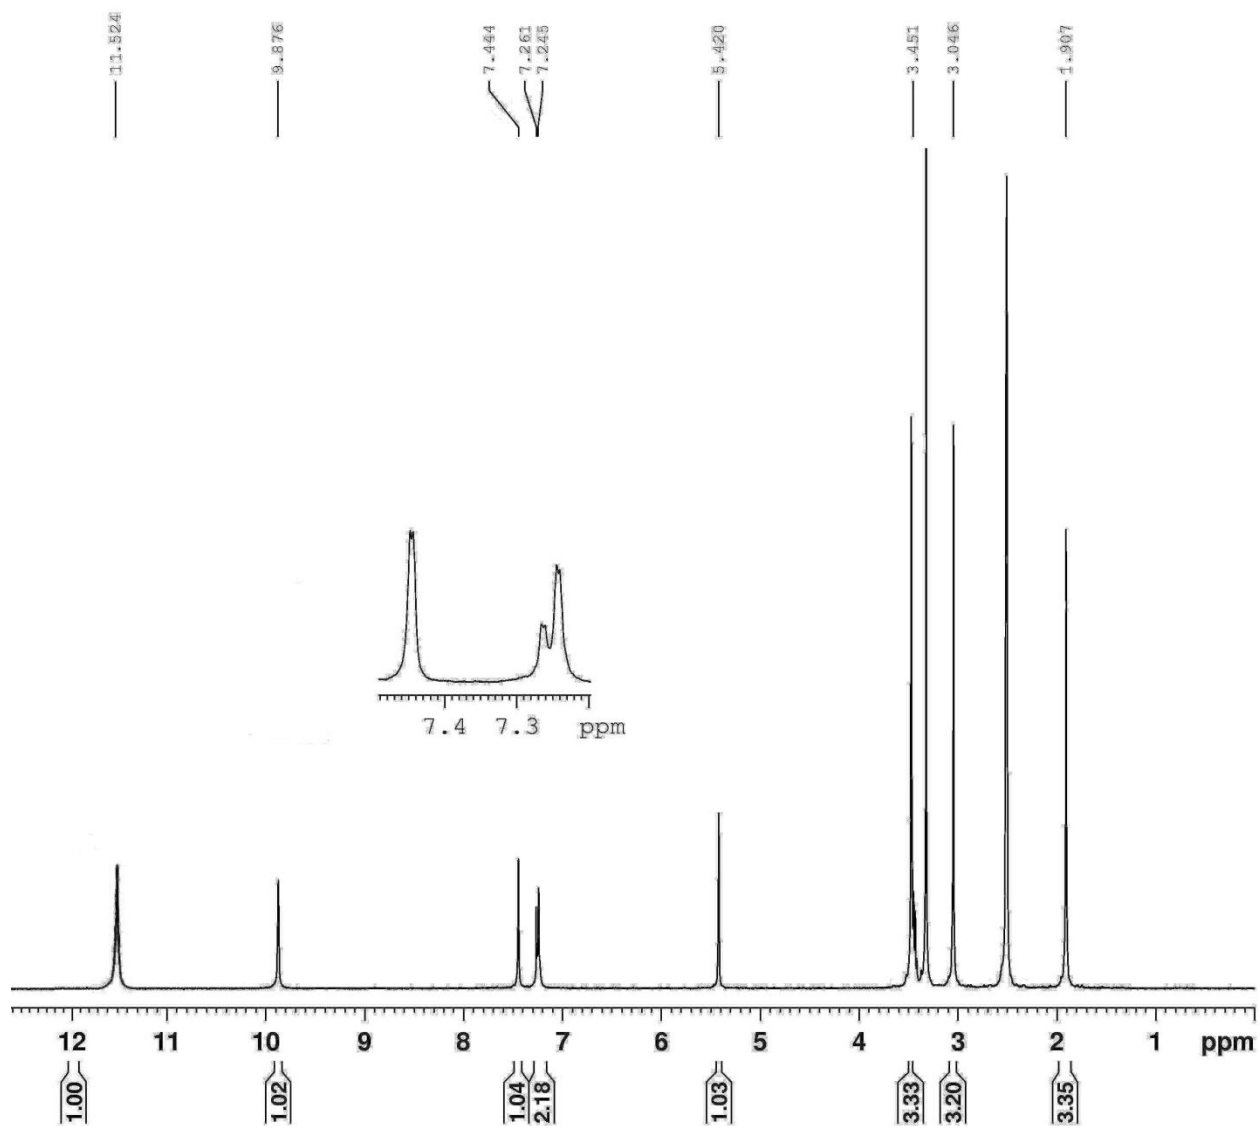



### $^{13}\text{C}$ NMR of compound **4i**

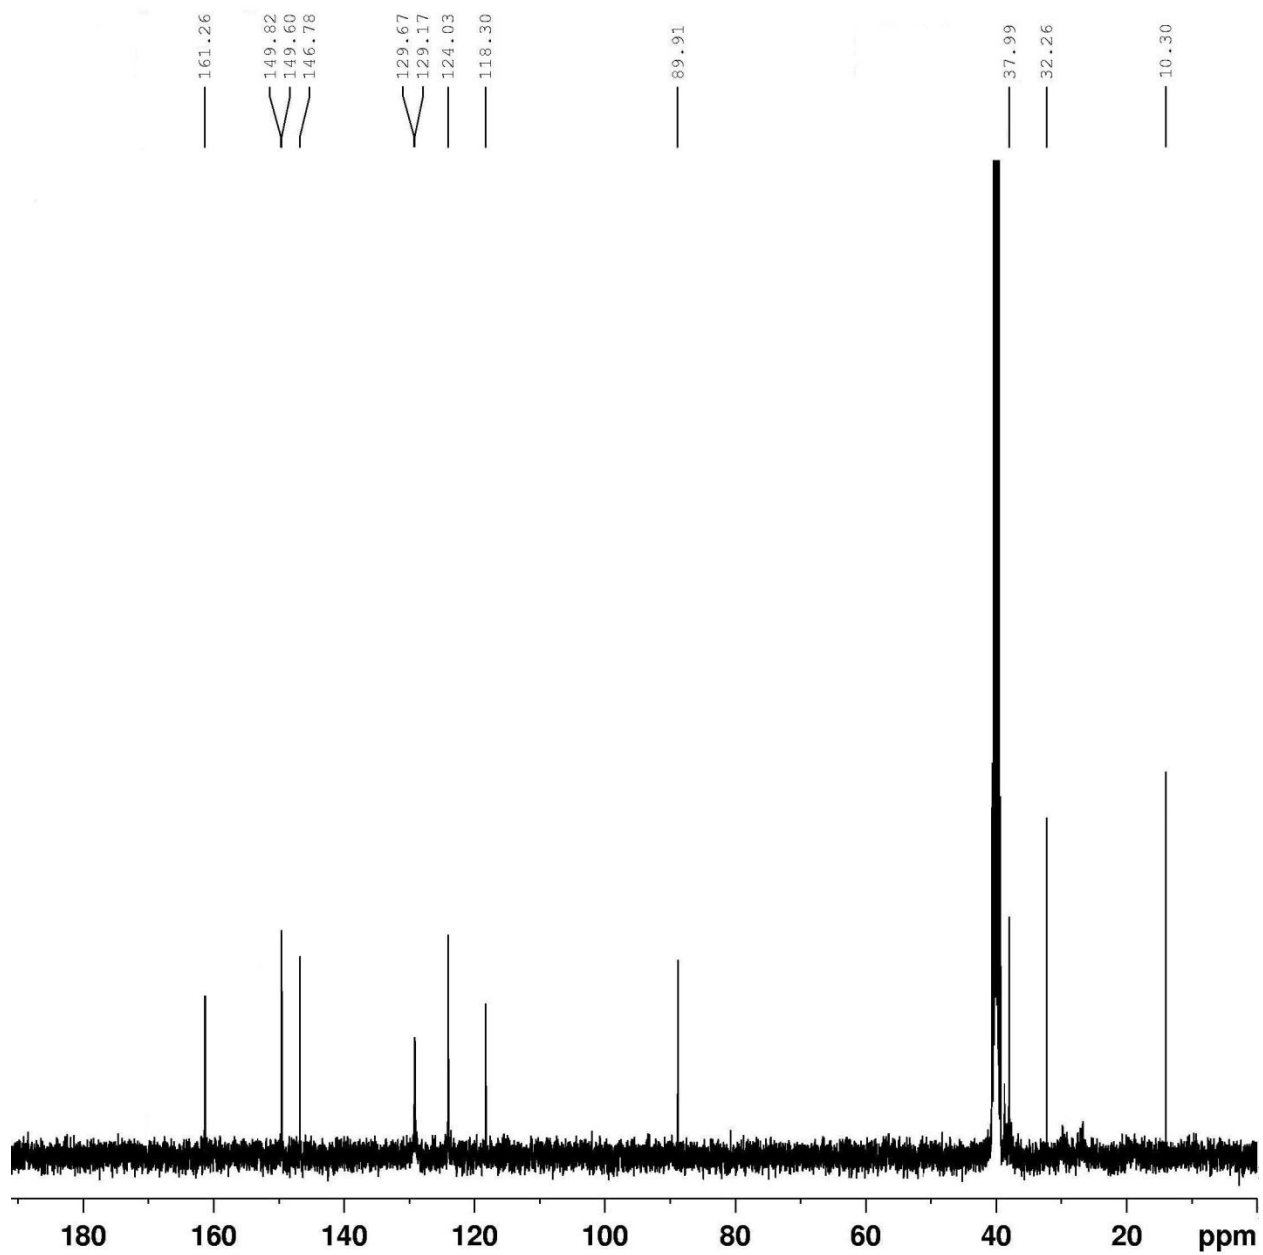

## LC-MS of compound 4j

Acquired by: Admin  
Sample ID: 20  
Vial#: 20  
Injection Volume: 30  
Data File: OST-J-13-70-3-87\_lcd  
Method file: X-BRIDGE\_150\_12min\_AA-FA.lcm

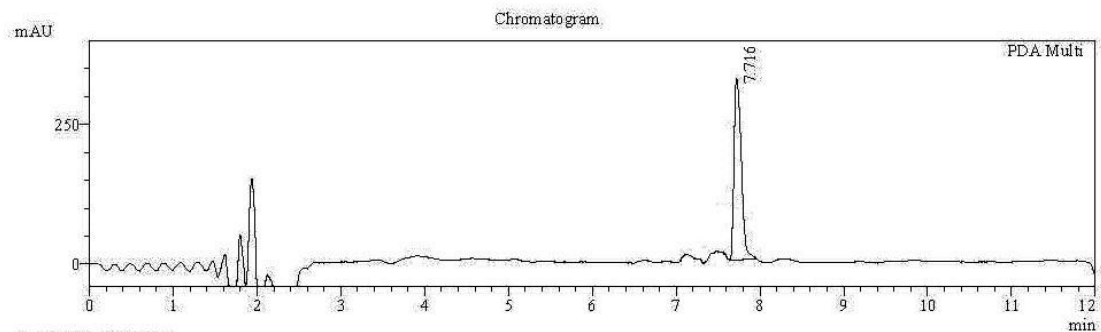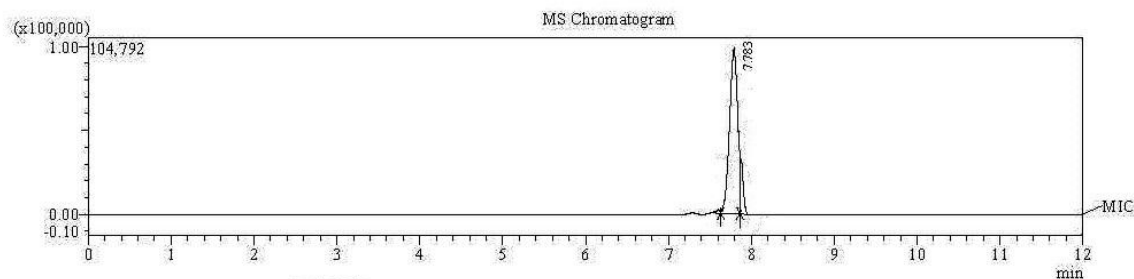

PeakTable

| Peak# | Ret. Time | Area    | Height | Area%   |
|-------|-----------|---------|--------|---------|
| 1     | 7.716     | 2052318 | 342235 | 100.000 |
| Total |           | 2052318 | 342235 | 100.000 |

MSTABLE MIC1

| Peak# | Ret.Time | Base Peak m/z | Area   | Area%  | Event# |
|-------|----------|---------------|--------|--------|--------|
| 1     | 7.783    | 330.43        | 933076 | 100.00 | 1-1    |
| Total |          |               | 933076 | 100.00 | 1-1    |

### MS Spectrum Graph

#1 Ret.Time:Averaged 7.767-7.800(Scan#:467-469)  
BG Mode:Calc 7.633<->7.867(459<->473)  
Base Peak:330.43(159294) Polarity:Pos Segment1 - Event1

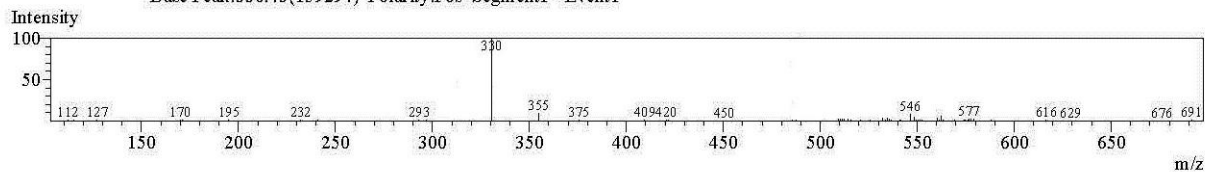

# <sup>1</sup>H NMR of compound **4j**

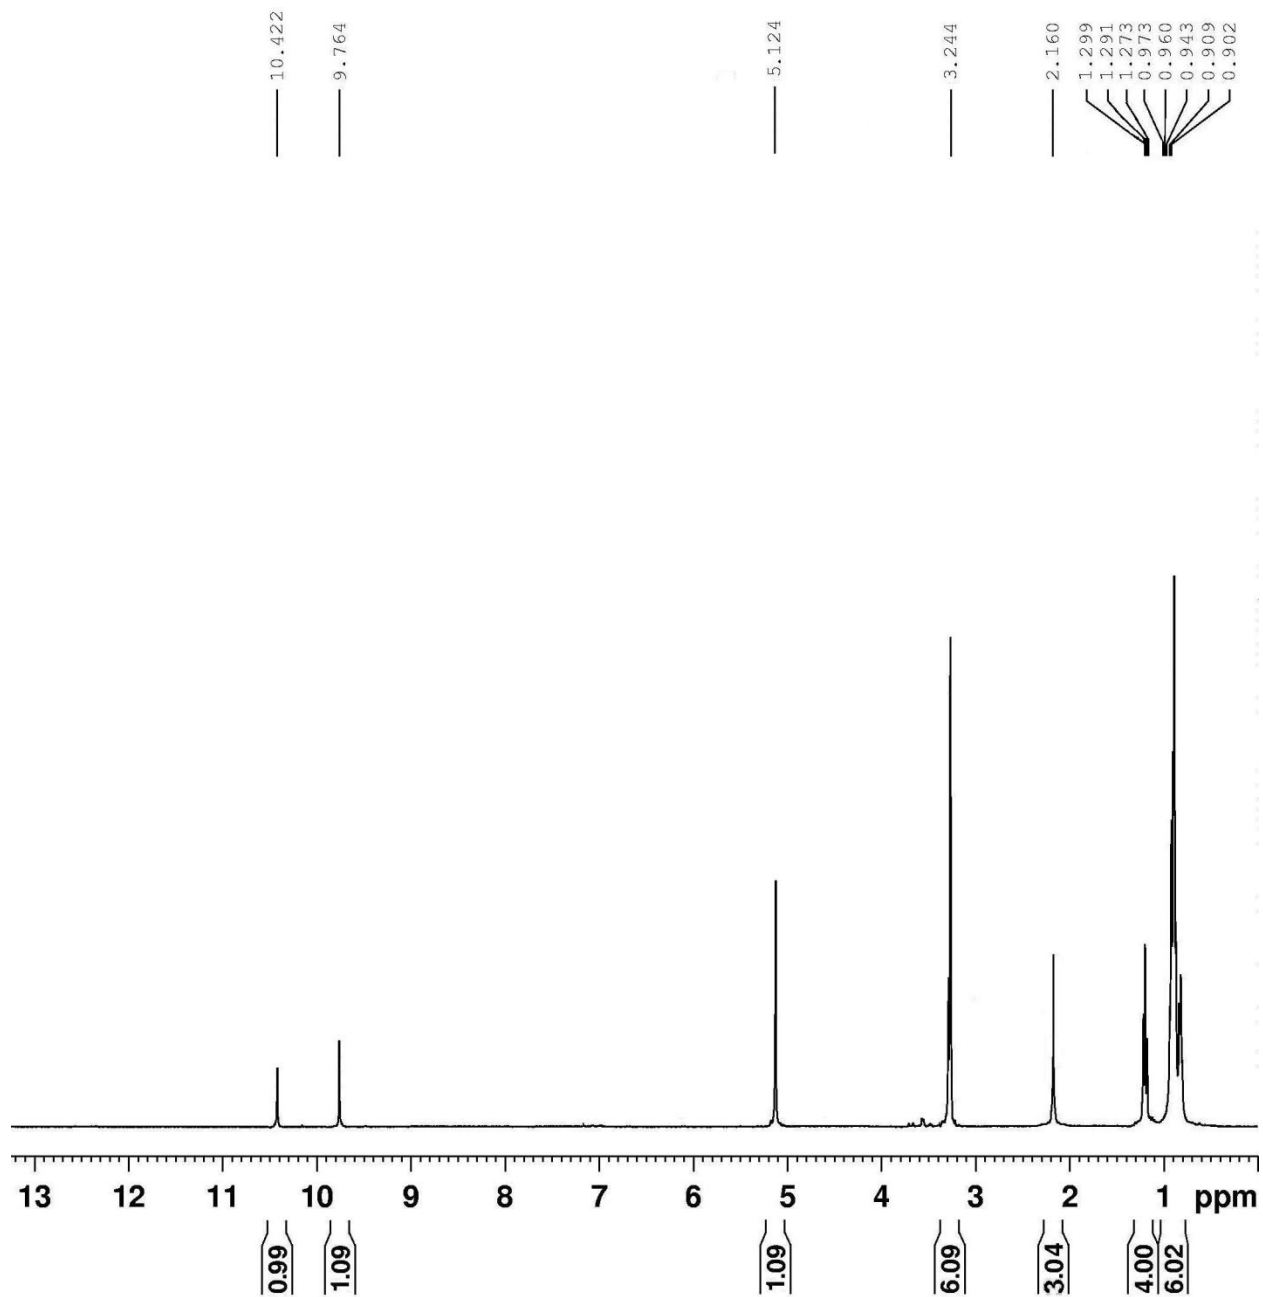

### $^{13}\text{C}$ NMR of compound **4j**

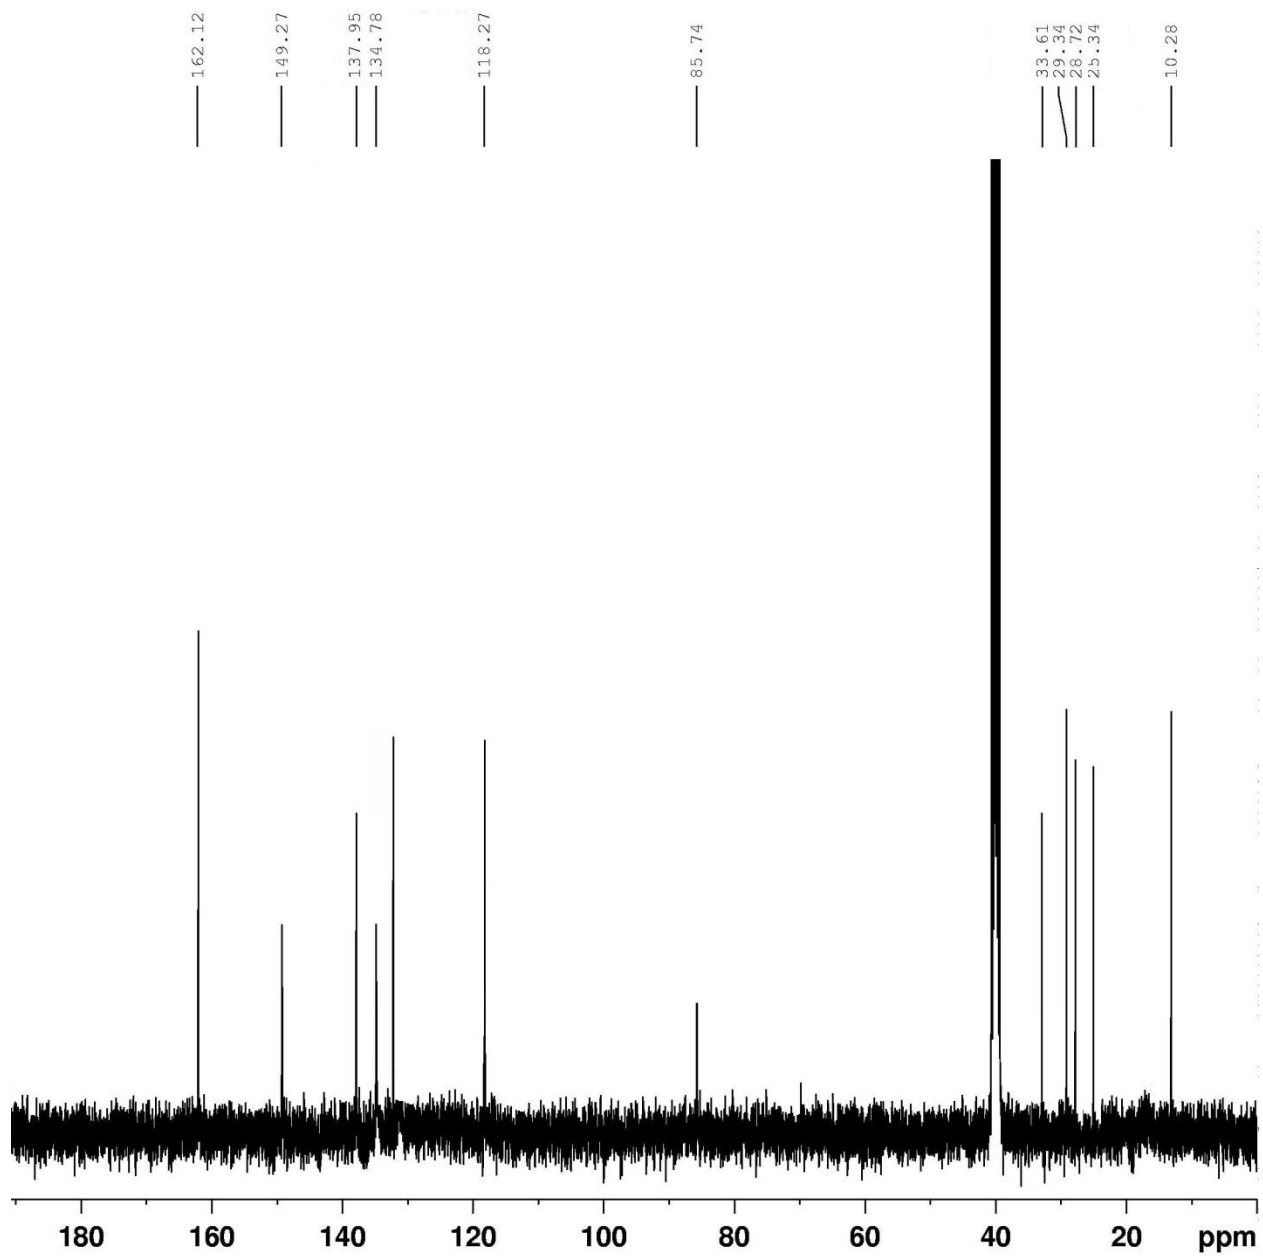

## LC-MS of compound 4k

Acquired by : Admin  
 Sample ID : 1  
 Vial# : 16  
 Injection Volume : 5  
 Data File : TPX-621-J3-FINAL.lcd  
 Method file : GENESIS-LCMS-ESI-150.lcm

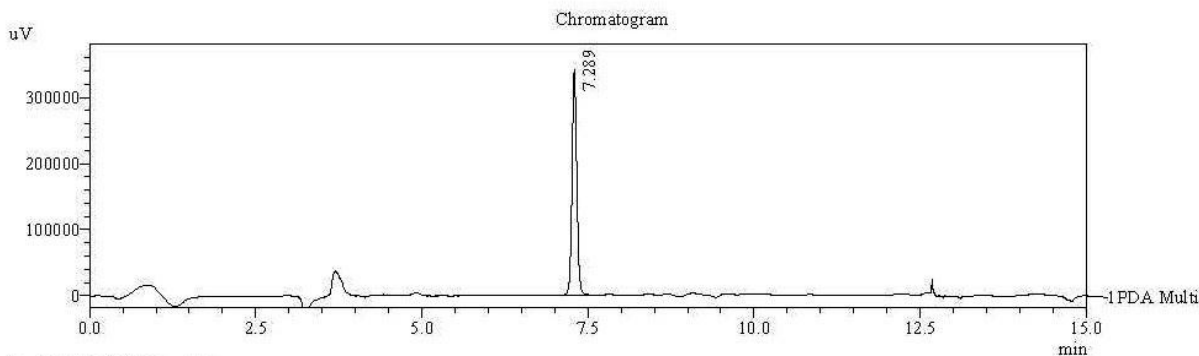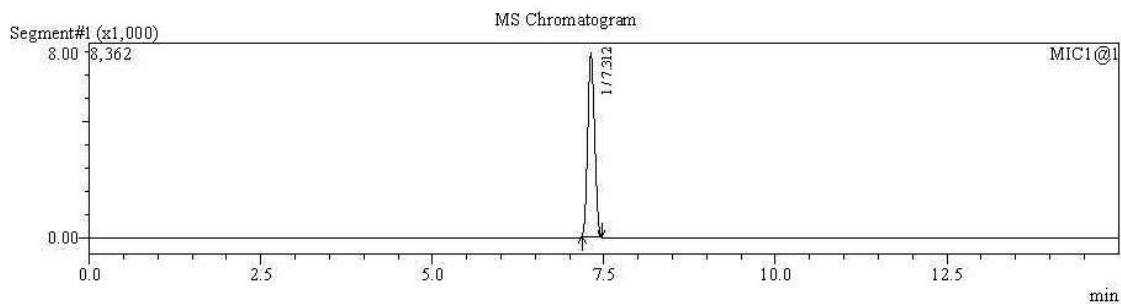

PeakTable

| Peak# | Ret. Time | Area    | Height | Area%   |
|-------|-----------|---------|--------|---------|
| 1     | 7.289     | 1685969 | 340291 | 100.000 |
| Total |           | 1685969 | 340291 | 100.000 |

MSTABLE MIC1

| Peak# | Ret.Time | Base Peak m/z | Area  | Area%  | Event# |
|-------|----------|---------------|-------|--------|--------|
| 1     | 7.312    | 414.60        | 55043 | 100.00 | 1-1    |
| Total |          |               | 55043 | 100.00 |        |

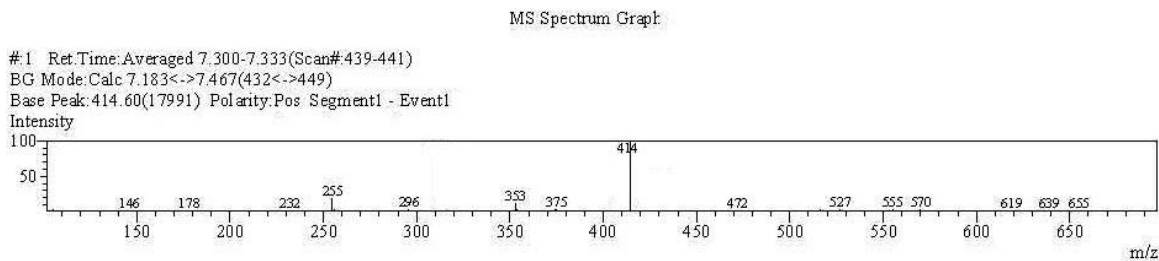

### $^1\text{H}$ NMR of compound **4k**

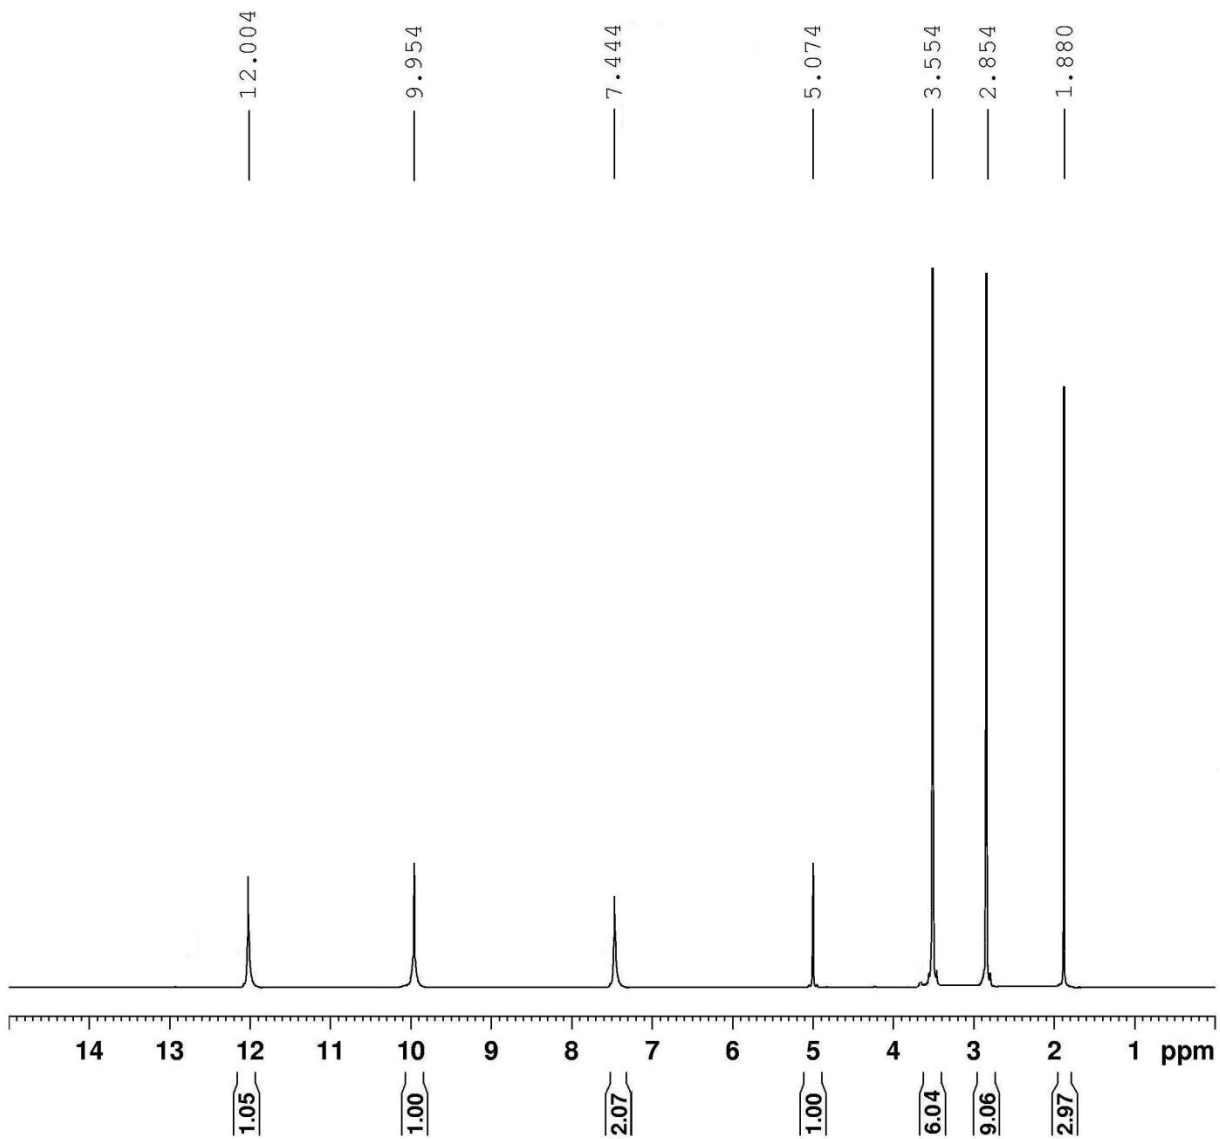

### $^{13}\text{C}$ NMR of compound **4k**

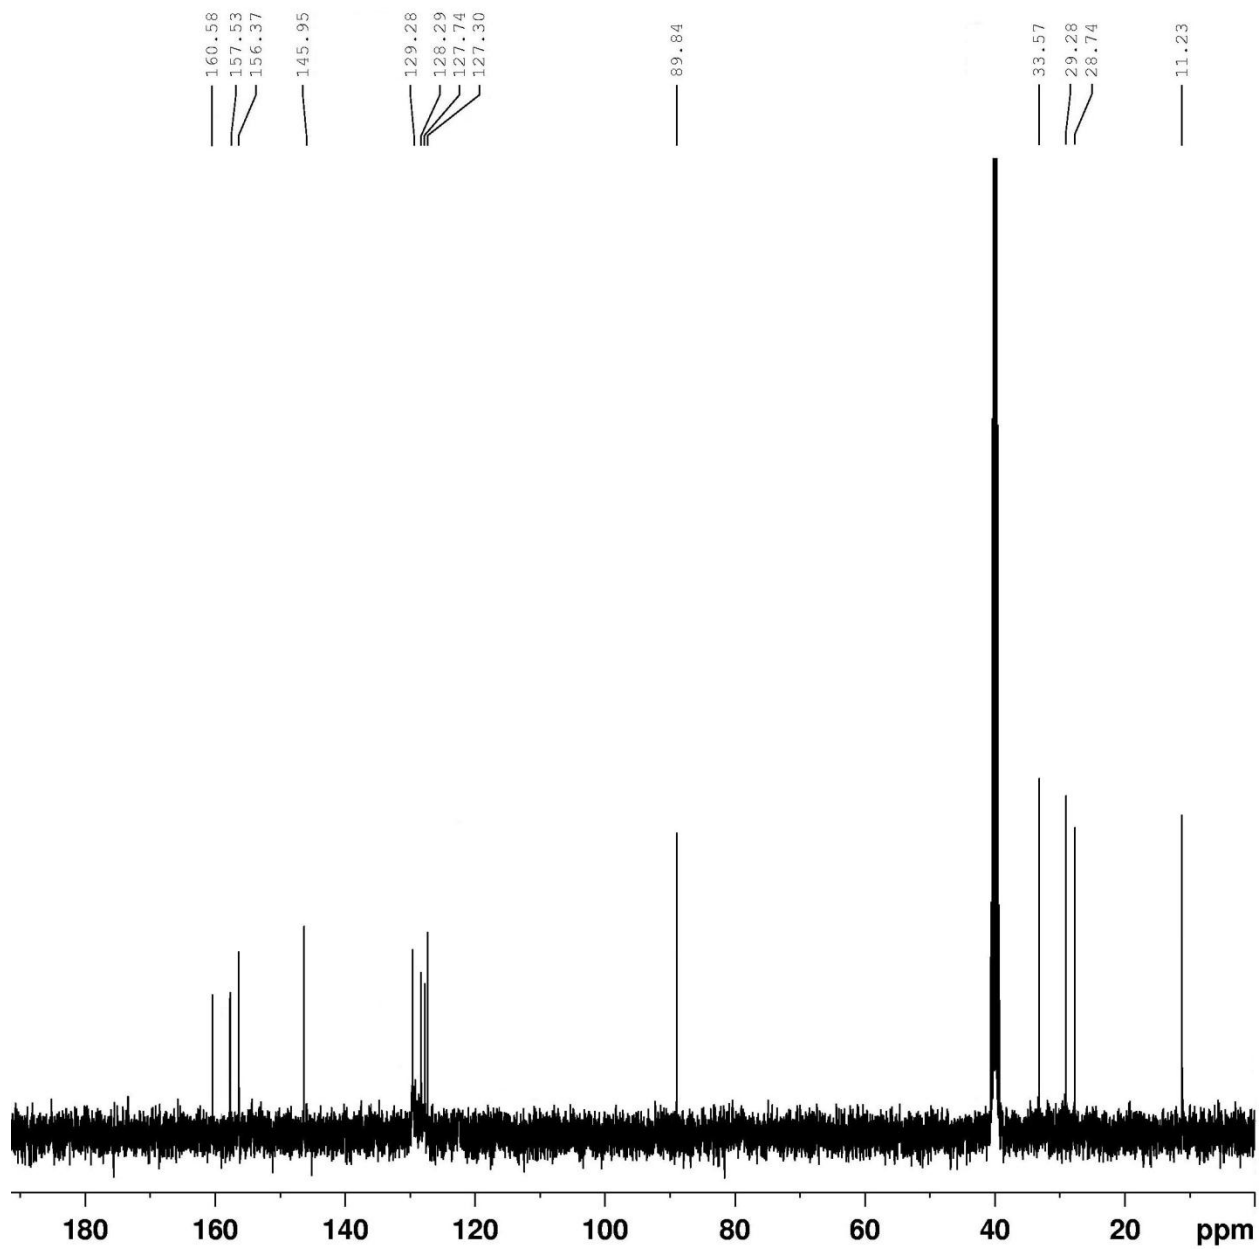

## LC-MS of compound 4l

Acquired by : Admin  
 Sample ID : 21  
 Vial# : 21  
 Injection Volume : 10  
 Data File : JAG-13-1-4-US.lcd  
 Method file : X-BRIDGE\_150\_12min\_AA-FA.lcm

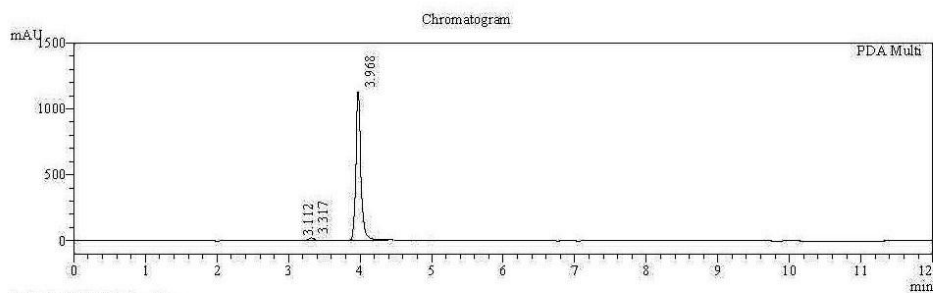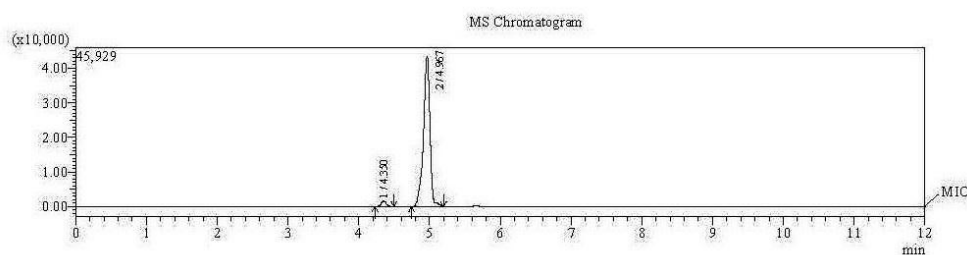

PDA Ch2 240nm 4nm

| Peak#        | Ret. Time | Area           | Height         | Area%          |
|--------------|-----------|----------------|----------------|----------------|
| 1            | 3.112     | 18292          | 3944           | 0.310          |
| 2            | 3.317     | 91974          | 19111          | 1.560          |
| 3            | 3.968     | 5786190        | 1185506        | 98.130         |
| <b>Total</b> |           | <b>5896455</b> | <b>1208561</b> | <b>100.000</b> |

MSTABLE MIC1

| Peak#        | Ret. Time | Base Peak m/z | Area          | Area%         | Event# |
|--------------|-----------|---------------|---------------|---------------|--------|
| 1            | 4.350     | 179.05        | 8304          | 2.91          | 1-1    |
| 2            | 4.967     | 478.10        | 277527        | 97.09         | 1-1    |
| <b>Total</b> |           |               | <b>285831</b> | <b>100.00</b> |        |

MS Spectrum Graph

#1 Ret. Time: Averaged 4.333-4.367 (Scan#: 261-263)  
 BG Mode: Calc 4.233<->4.500 (255<->271)  
 Base Peak: 179.05 (5403) Polarity: Pos Segment1 - Event1  
 Intensity

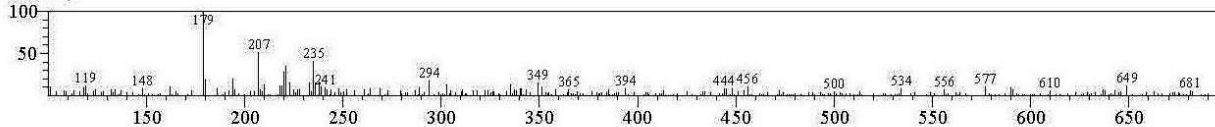

#2 Ret. Time: Averaged 4.950-4.983 (Scan#: 298-300)  
 BG Mode: Calc 4.750<->5.200 (286<->313)  
 Base Peak: 478.10 (72312) Polarity: Pos Segment1 - Event1  
 Intensity

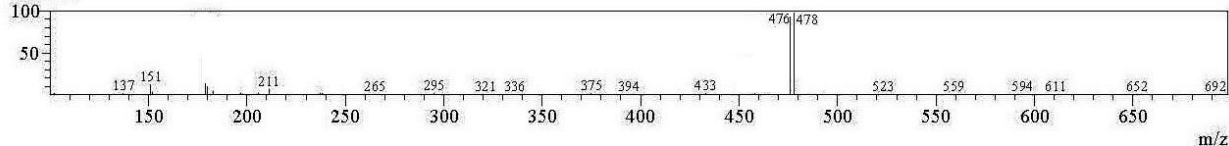



# <sup>1</sup>H NMR of compound **4I**

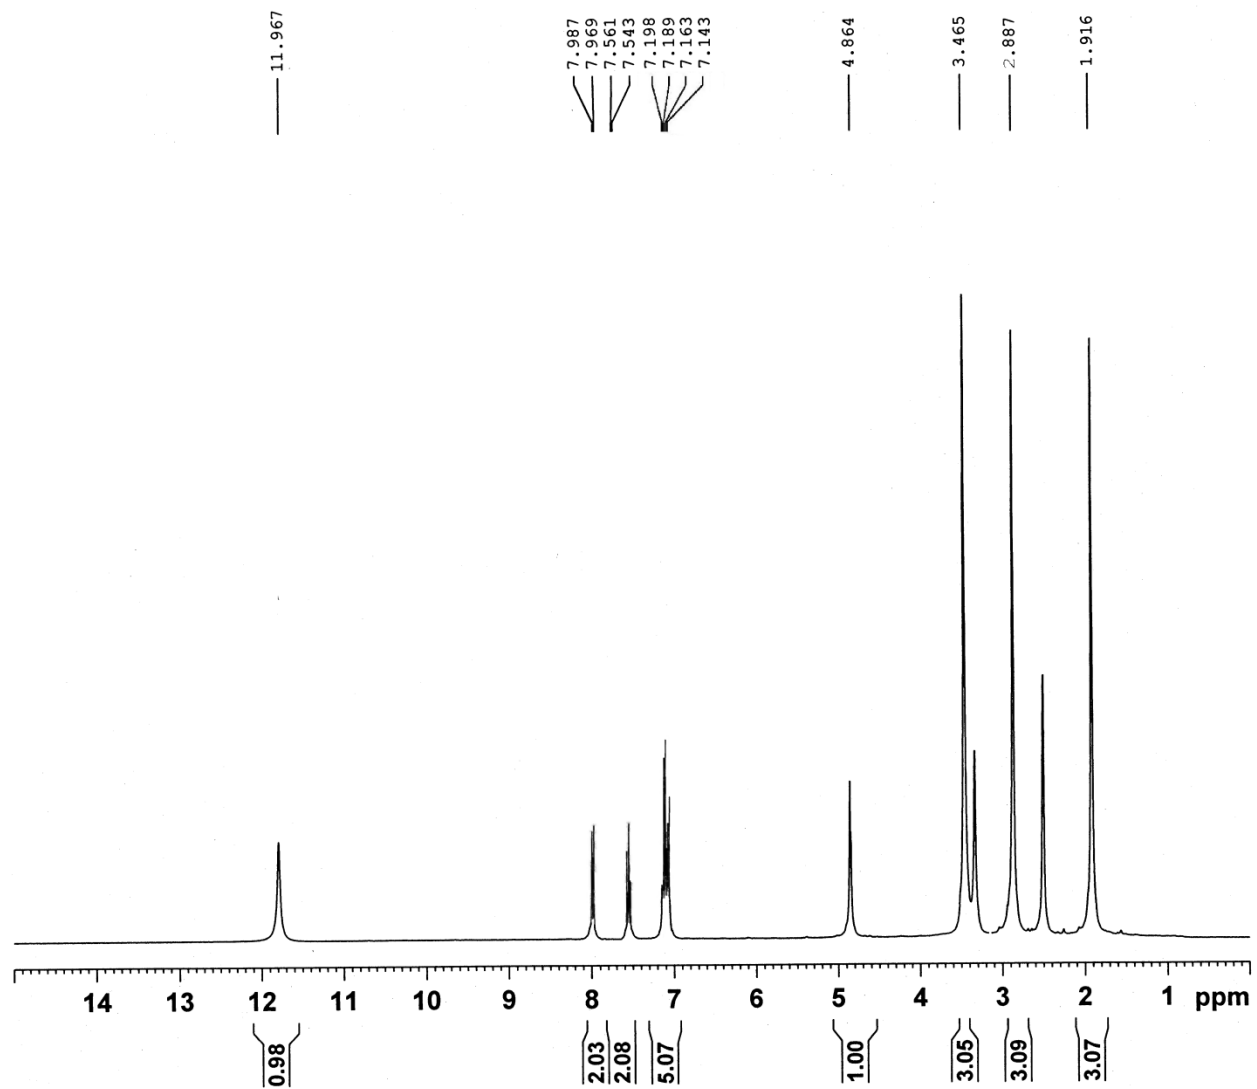

### $^{13}\text{C}$ NMR of compound **4I**

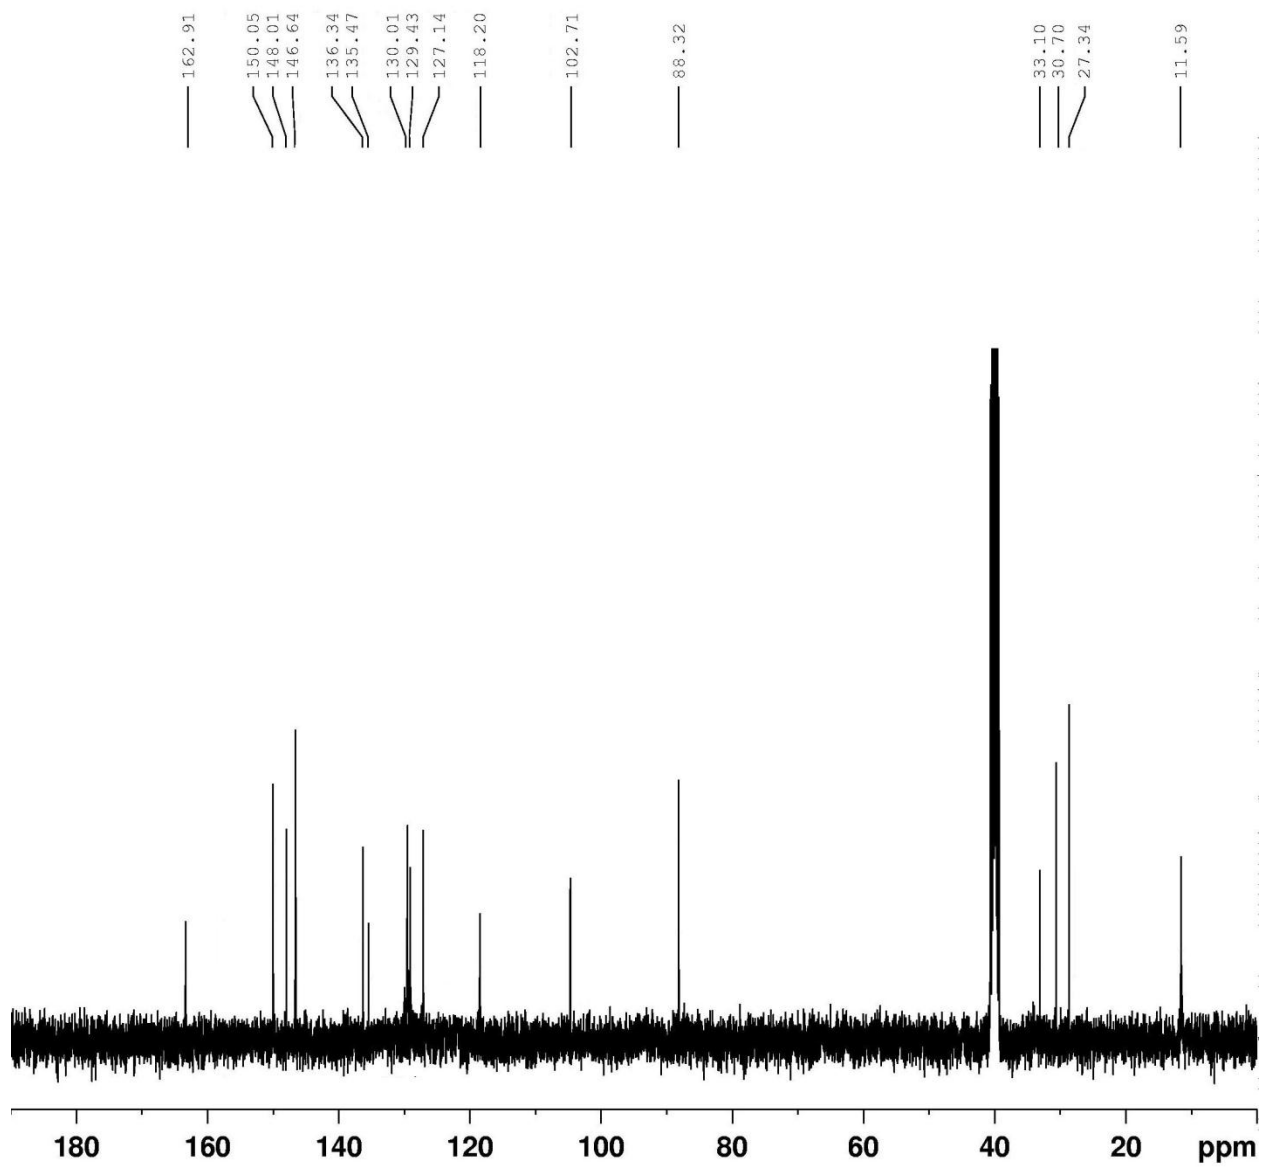

## LC-MS of compound 4m

Acquired by: Admin  
 Sample ID: 3  
 Vial#: 19  
 Injection Volume: 12  
 Data File: OST-J-14-89-ST-5-147\_lcd  
 Method file: X-BRIDGE\_150\_12min\_AA-FA.lcm

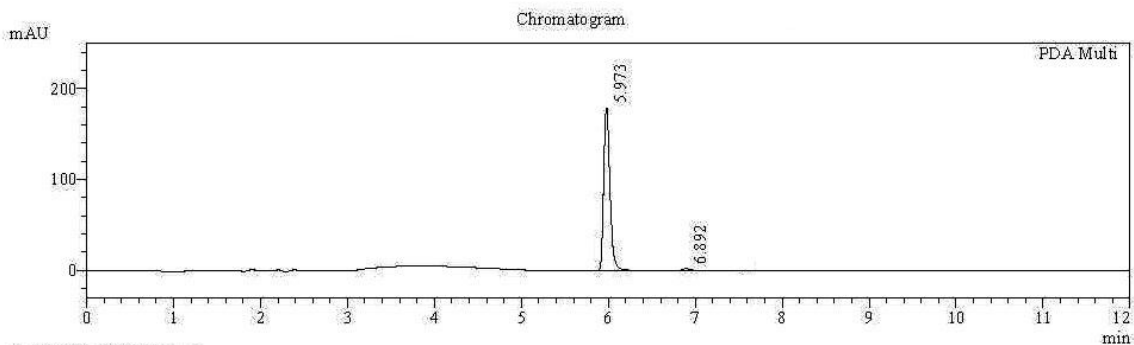

1 PDA Multi / 329nm 4nm

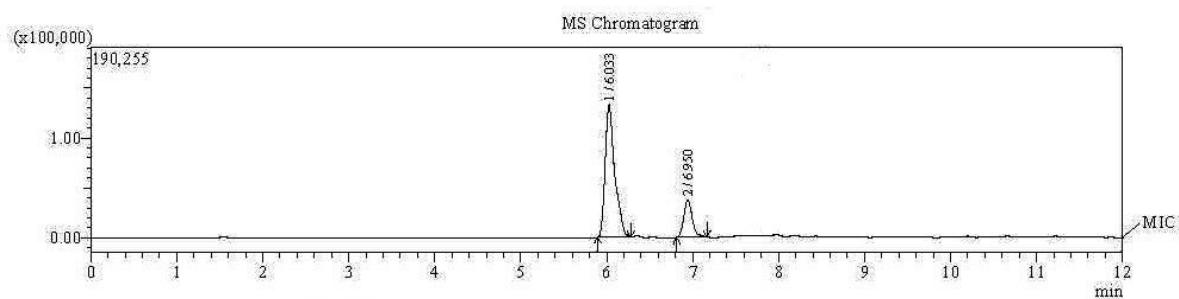

PeakTable

PDA Ch1 329nm 4nm

| Peak# | Ret. Time | Area   | Height | Area%   |
|-------|-----------|--------|--------|---------|
| 1     | 5.973     | 908203 | 183033 | 98.914  |
| 2     | 6.892     | 9966   | 1939   | 1.085   |
| Total |           | 918169 | 184972 | 100.000 |

MSTABLE MIC1

| Peak# | Ret. Time | Base Peak m/z | Area    | Area%  | Event# |
|-------|-----------|---------------|---------|--------|--------|
| 1     | 6.033     | 400.25        | 2576798 | 91.03  | 1-1    |
| 2     | 6.950     | 302.20        | 253881  | 8.97   | 1-1    |
| Total |           |               | 2830679 | 100.00 |        |

MS Spectrum Graph

#1 Ret. Time: Averaged 6.017-6.050 (Scan#: 362-364)  
 BG Mode: Calc 5.900<->6.283 (355<->378)  
 Base Peak: 400.25 (206089) Polarity: Pos Segment1 - Event1

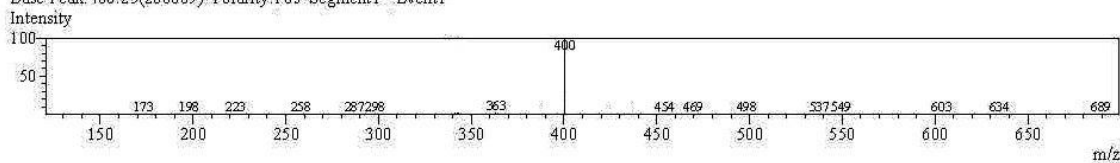

#2 Ret. Time: Averaged 6.933-6.967 (Scan#: 417-419)  
 BG Mode: Calc 6.817<->7.167 (410<->431)  
 Base Peak: 300.20 (59166) Polarity: Pos Segment1 - Event1

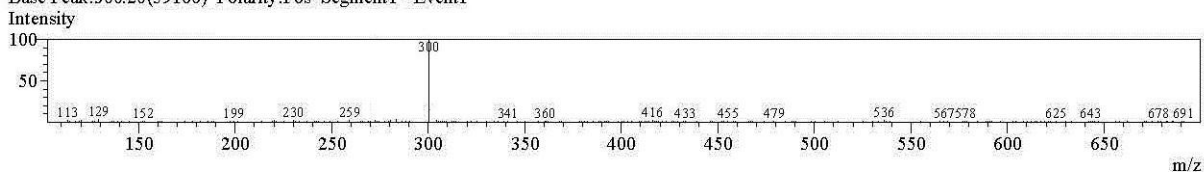

### $^1\text{H}$ NMR of compound **4m**

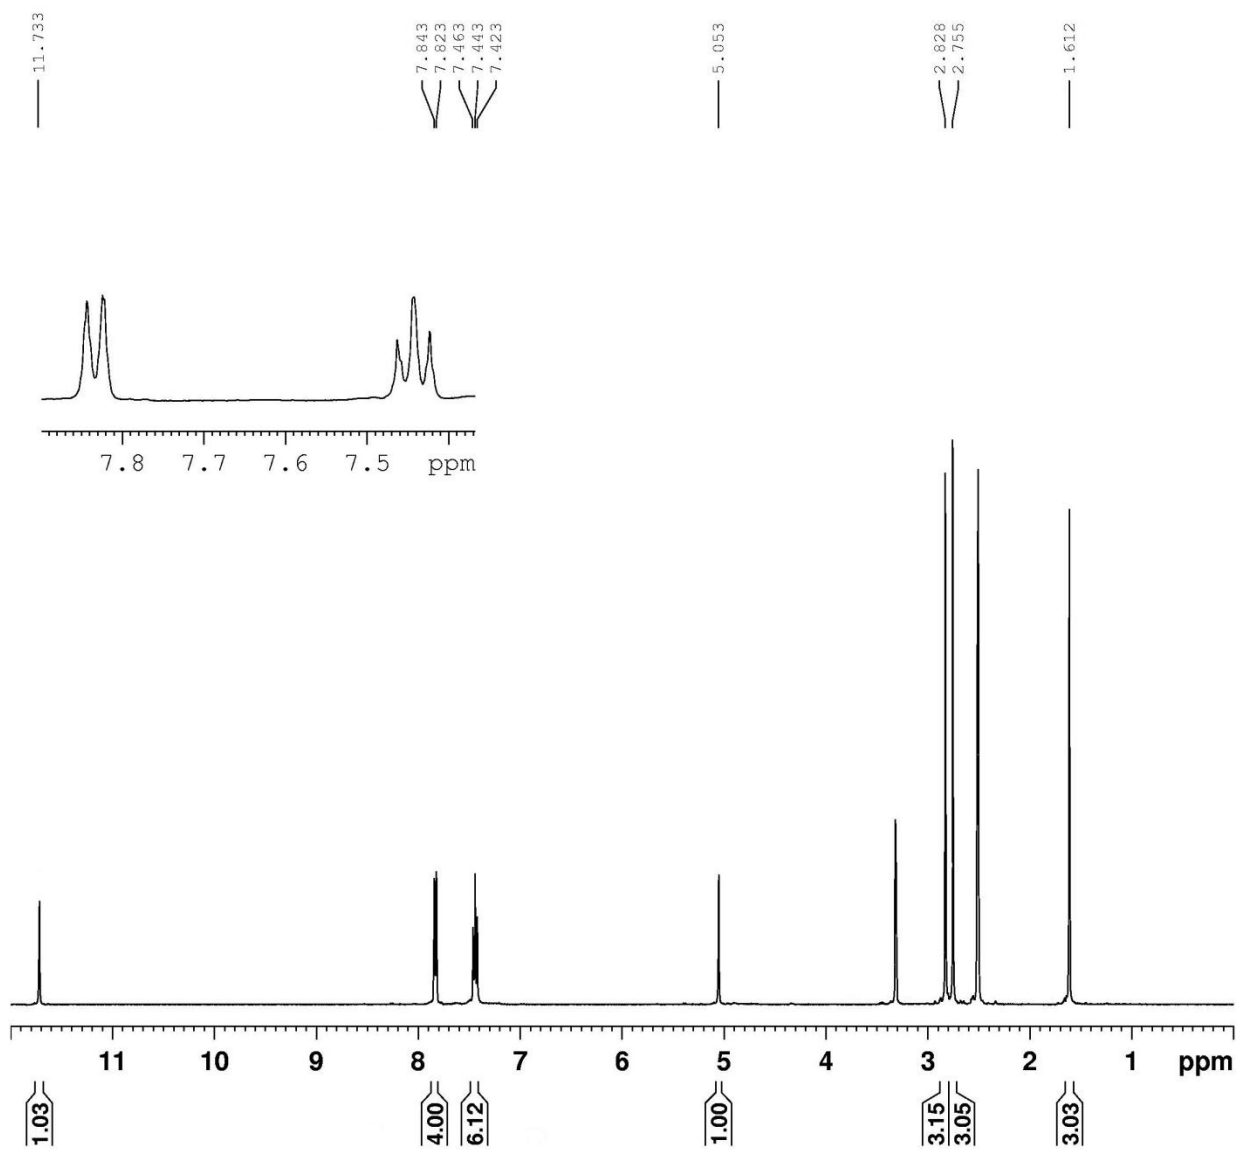

### $^{13}\text{C}$ NMR of compound **4m**

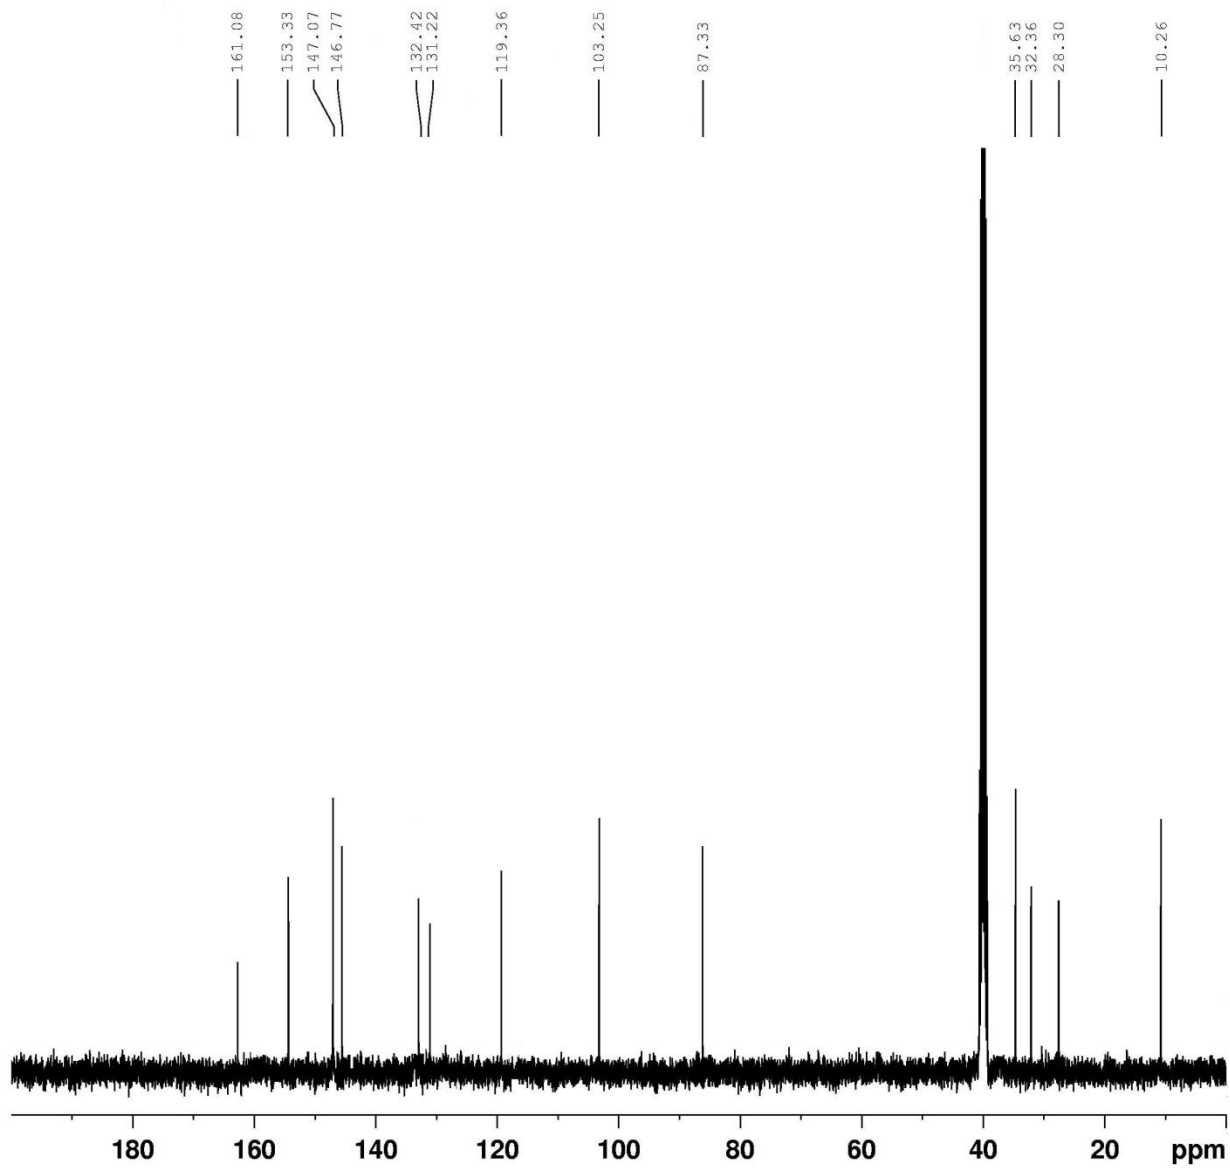

## LC-MS of compound **4n**

Acquired by : Admin  
Sample ID : 3  
Vial# : 3  
Injection Volume : 5  
Data File : VTX-622-D-30-FINAL-AP21cd  
Method file : GENESIS-LCMS-ESI-150.lcm

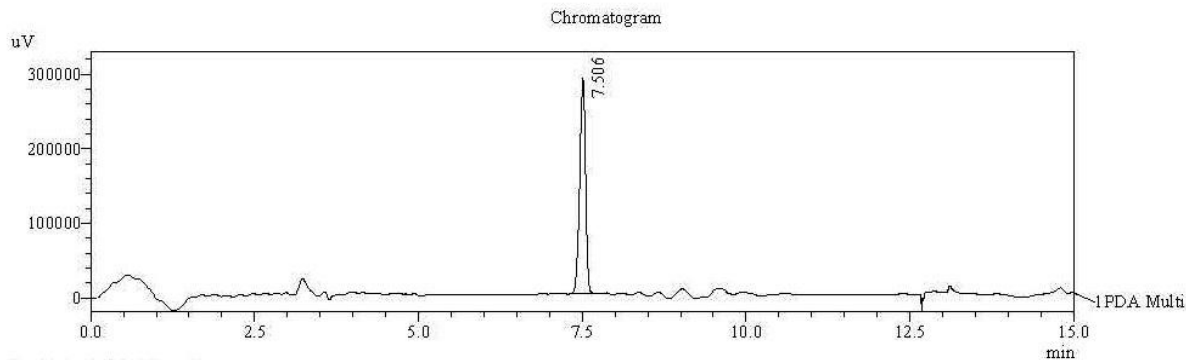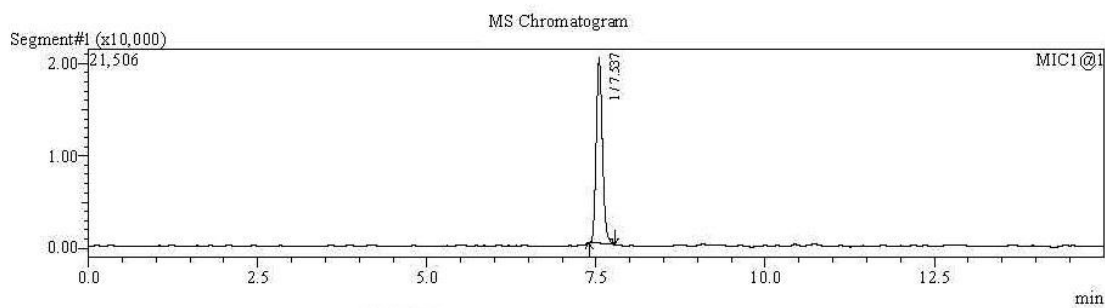

PeakTable

| Peak# | Ret. Time | Area    | Height | Area%   |
|-------|-----------|---------|--------|---------|
| 1     | 7.506     | 1796660 | 289211 | 100.000 |
| Total |           | 1796660 | 289211 | 100.000 |

MSTABLE MIC1

| Peak# | Ret. Time | Base Peak m/z | Area   | Area%  | Event# |
|-------|-----------|---------------|--------|--------|--------|
| 1     | 7.537     | 445.10        | 127246 | 100.00 | 1-1    |
| Total |           |               | 127246 | 100.00 |        |

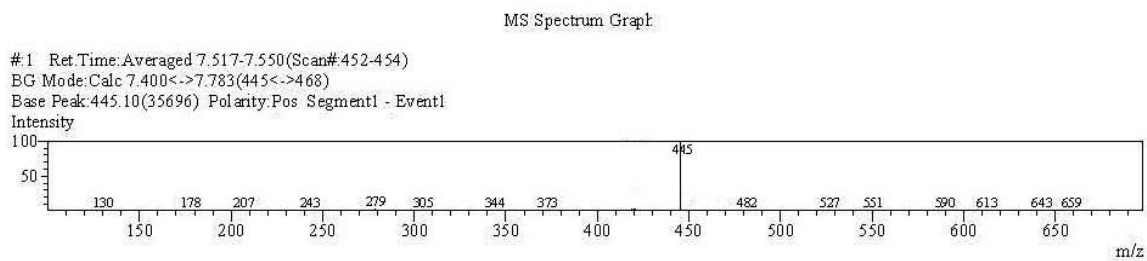

### $^1\text{H}$ NMR of compound **4n**

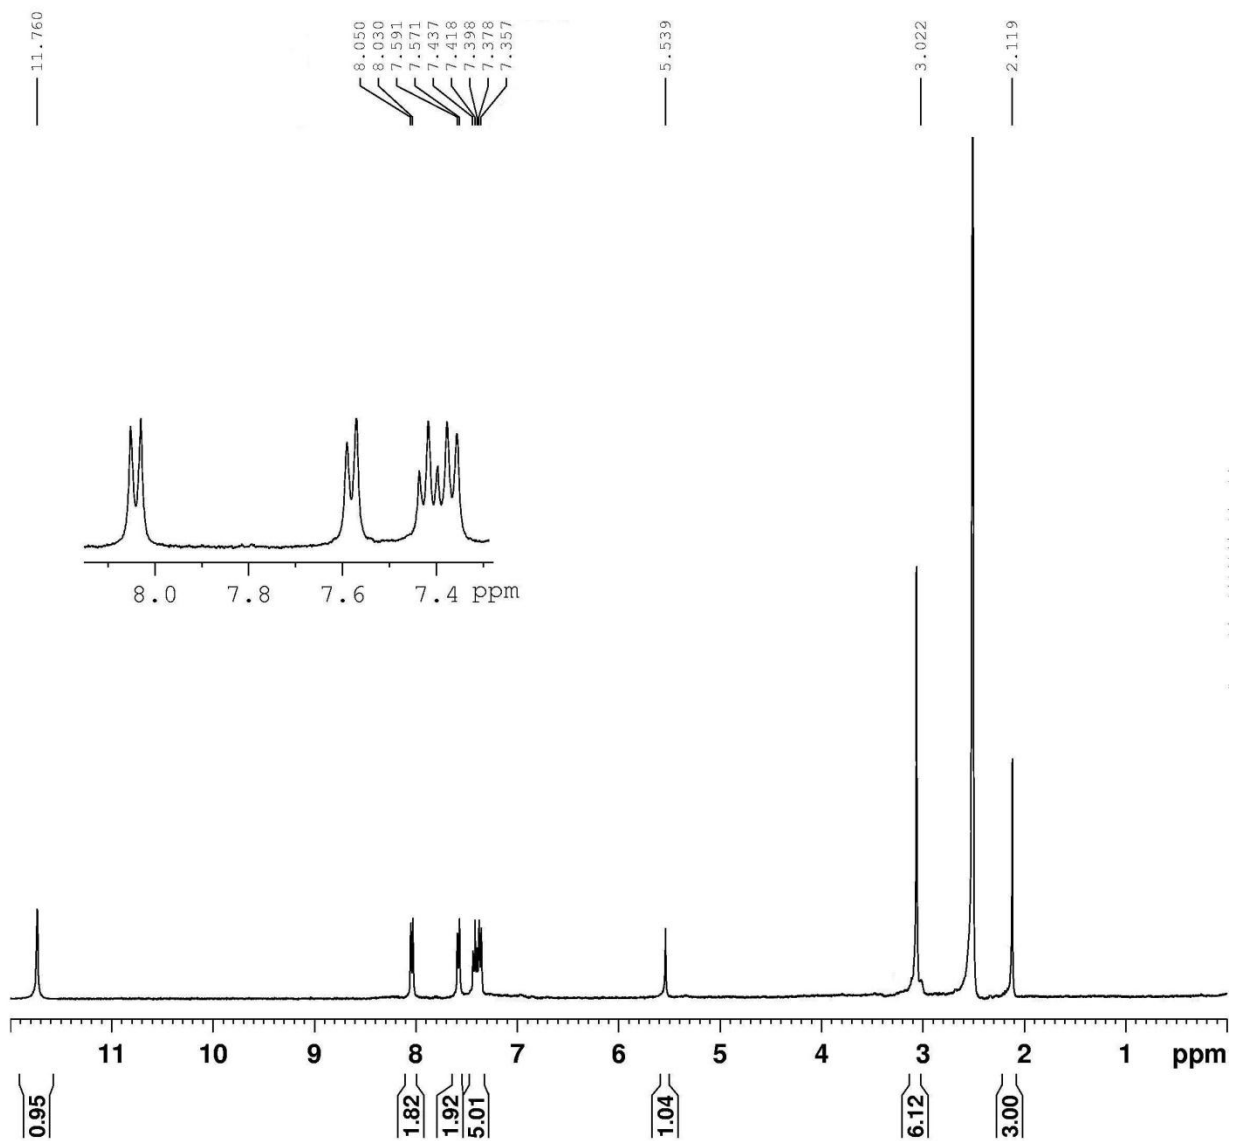

### $^{13}\text{C}$ NMR of compound **4n**

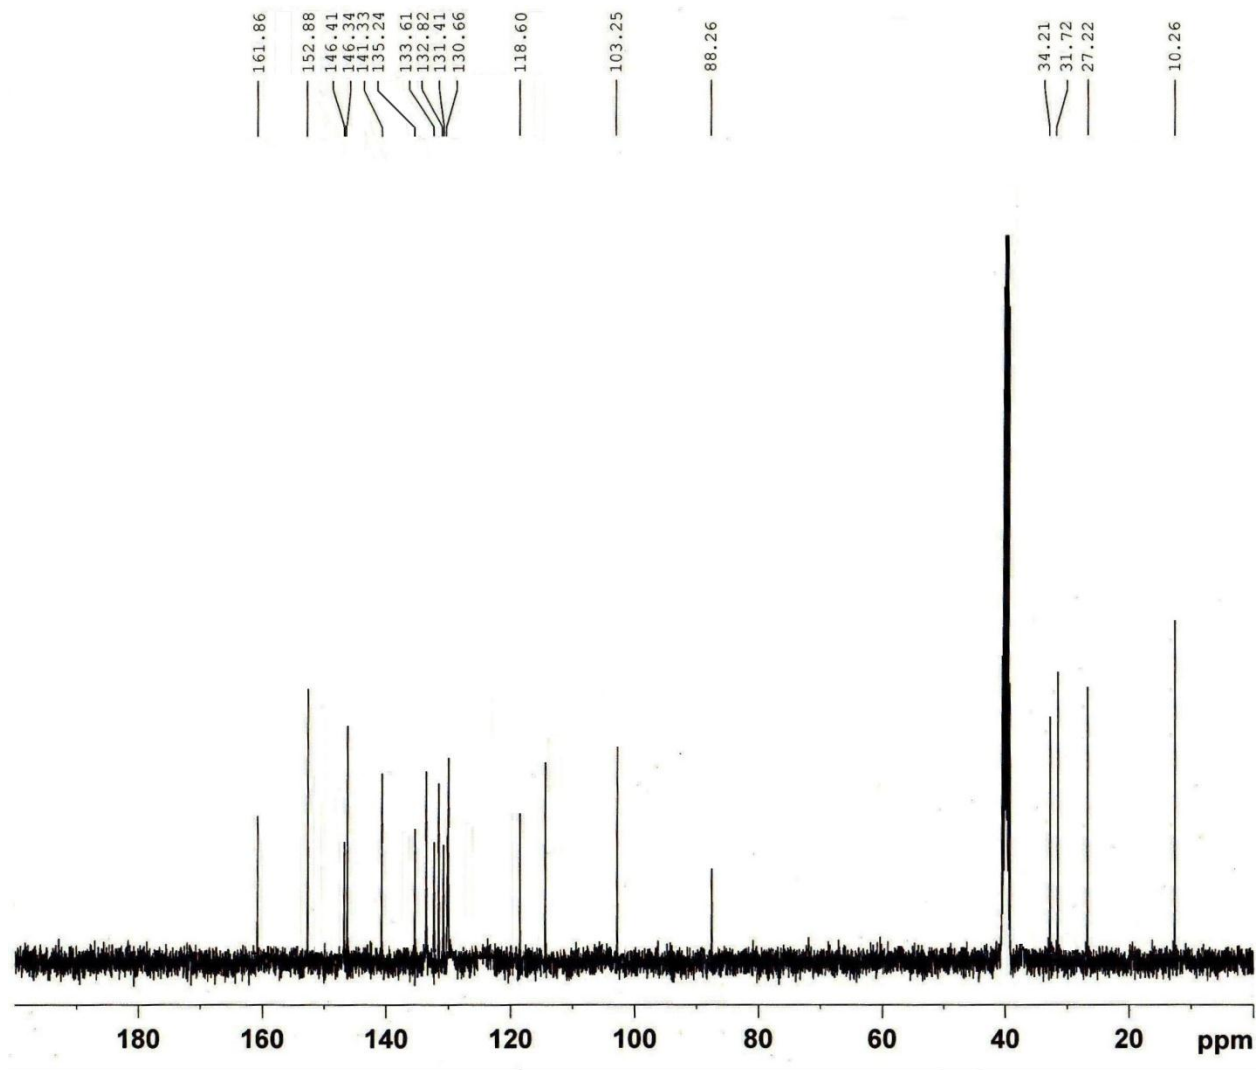



## LC-MS of compound **4o**

Acquired by : Admin  
Sample ID : 22  
Vial# : 22  
Injection Volume : 10  
Data File : OST-J-12-1131cd  
Method file : X-BRIDGE\_150\_12min\_AA-FA.lcm

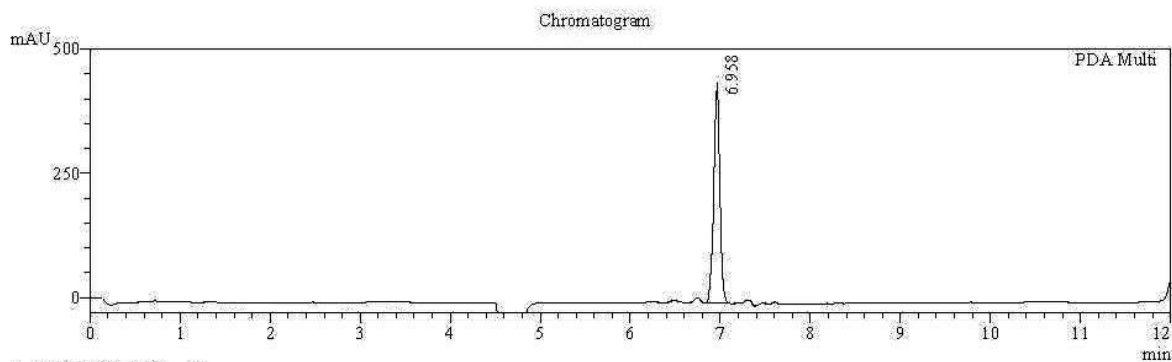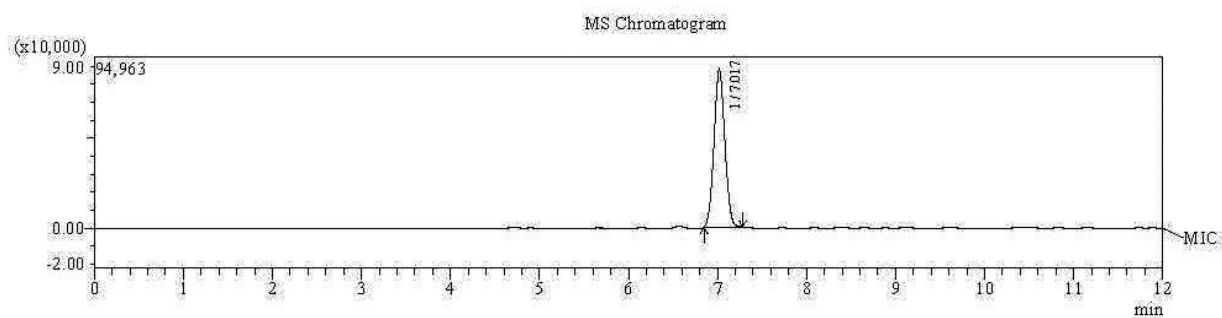

PeakTable

PDA Ch1 212nm 4nm

| Peak# | Ret. Time | Area    | Height | Area%   |
|-------|-----------|---------|--------|---------|
| 1     | 6.958     | 3161673 | 654343 | 100.000 |
| Total |           | 3161673 | 654343 | 100.000 |

MSTABLE MIC1

| Peak# | Ret. Time | Base Peak m/z | Area   | Area%  | Event# |
|-------|-----------|---------------|--------|--------|--------|
| 1     | 7.017     | 414.35        | 740099 | 100.00 | 1-1    |
| Total |           |               | 740099 | 100.00 |        |

MS Spectrum Graph

#1 RetTime: Averaged 7.000-7.033(Scan# 421-423)

BG Mode: Calc 6.850<->7.283(412<->438)

Base Peak: 414.35(111018) Polarity: Pos Segment1 - Event1

Intensity

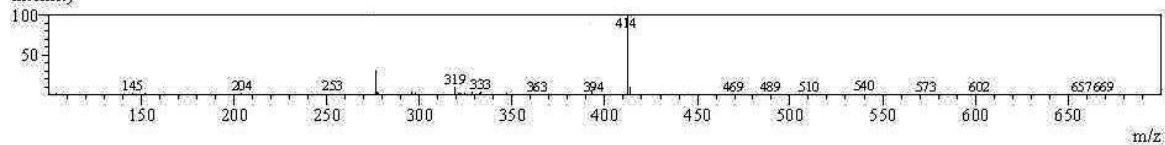

### <sup>1</sup>H NMR of compound **4o**

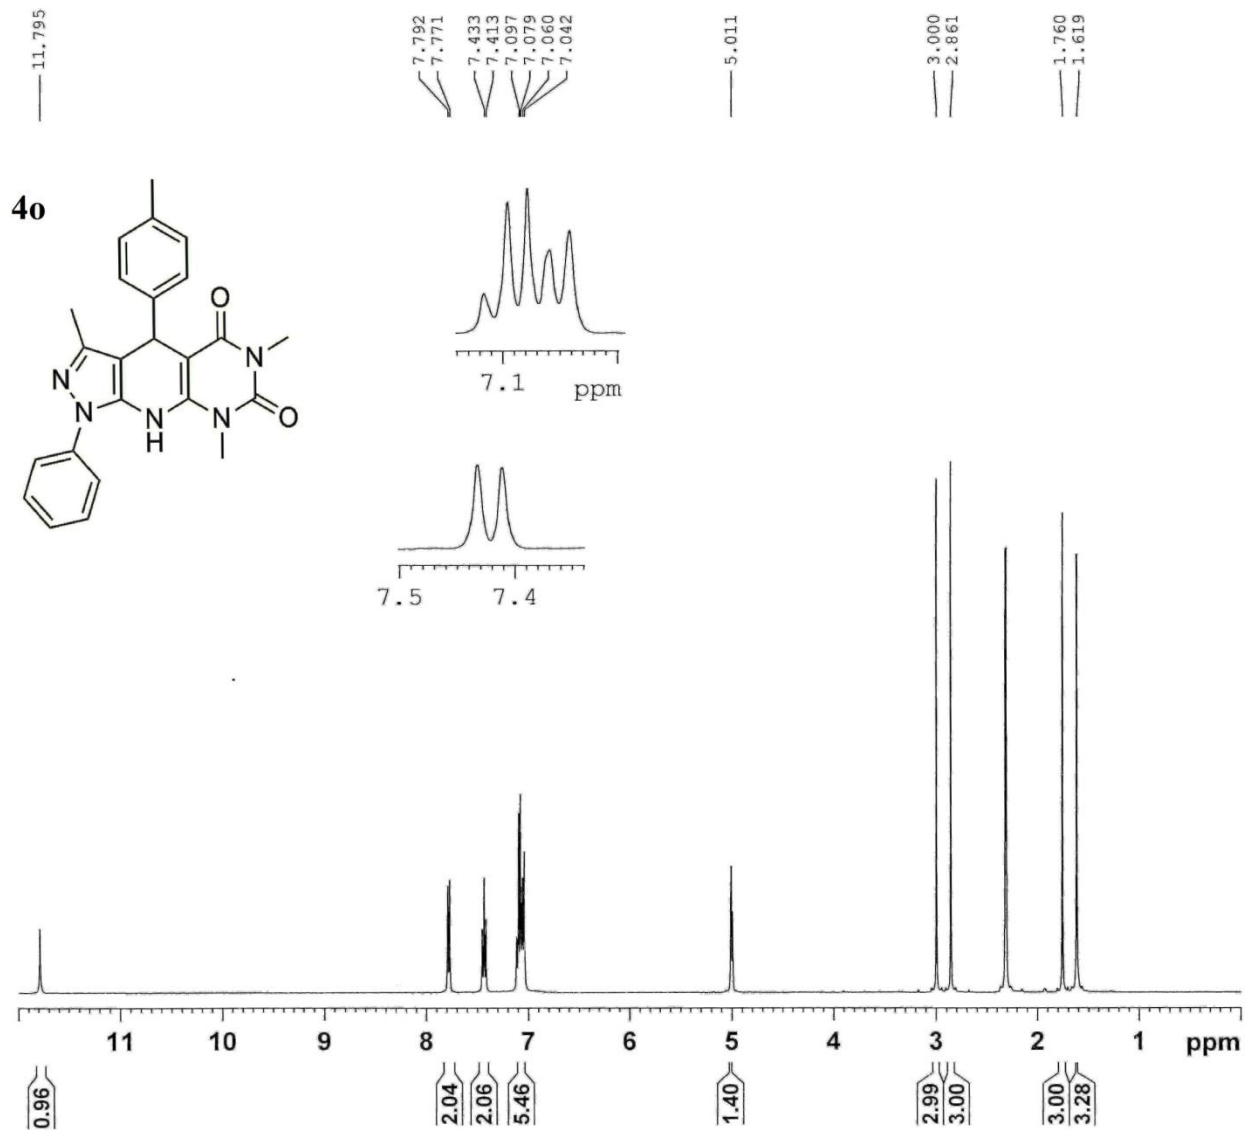

### $^{13}\text{C}$ NMR of compound **4o**

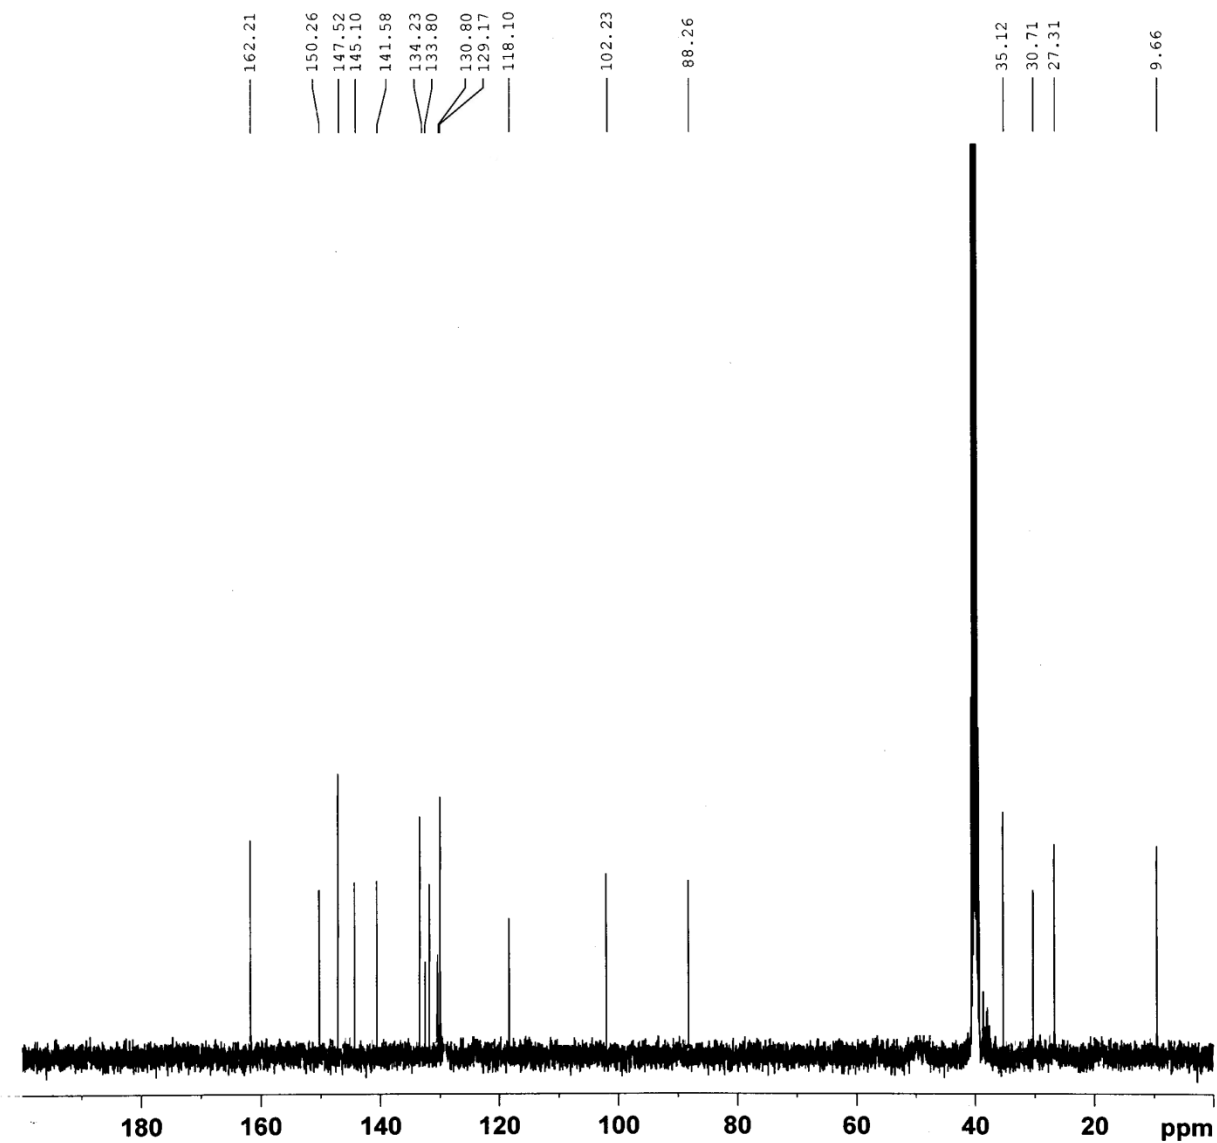

## LC-MS of compound 4p

Acquired by : Admin  
 Sample ID : 3  
 Vial# : 3  
 Injection Volume : 10  
 Data File : BDX-615-E-44-FINAL11.cdf  
 Method file : LCMS-ESI1.cdf

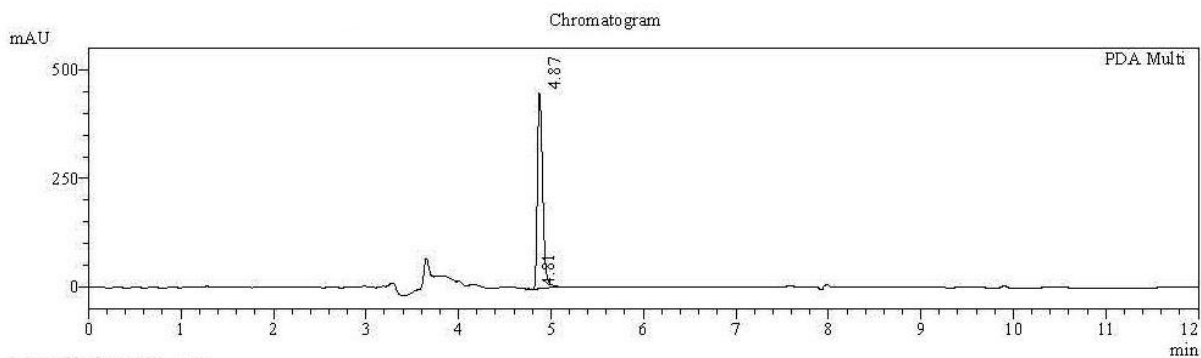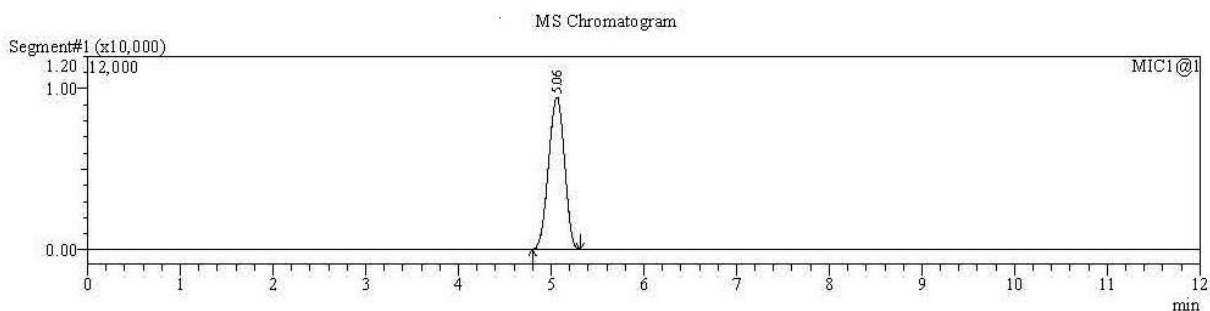

PeakTable

| Peak# | Ret. Time | Area    | Height | Area%  |
|-------|-----------|---------|--------|--------|
| 1     | 4.81      | 1001    | 362    | 0.06   |
| 2     | 4.87      | 1767146 | 449903 | 99.94  |
| Total |           | 1768147 | 450265 | 100.00 |

MSTABLE MIC1

| Peak# | Ret.Time | Base Peak m/z | Area   | Area%  | Event# |
|-------|----------|---------------|--------|--------|--------|
| 1     | 5.06     | 406.21        | 112778 | 100.00 | 1-1    |
| Total |          |               | 112778 | 100.00 |        |

MS Spectrum Graph

#1 Ret.Time:Averaged 5.033-5.067(Scan#303-305)

BG Mode:Calc 4.800<->5.317(289<->320)

Base Peak:406.21(34162) Polarity:Pos Segment1 - Event1

Intensity

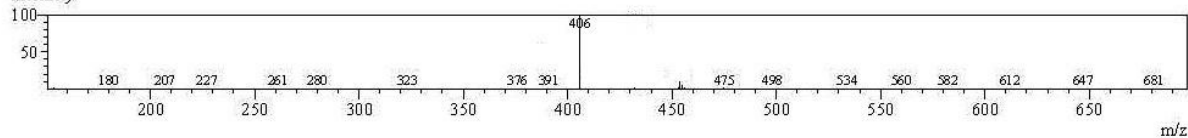

### $^1\text{H}$ NMR of compound **4p**

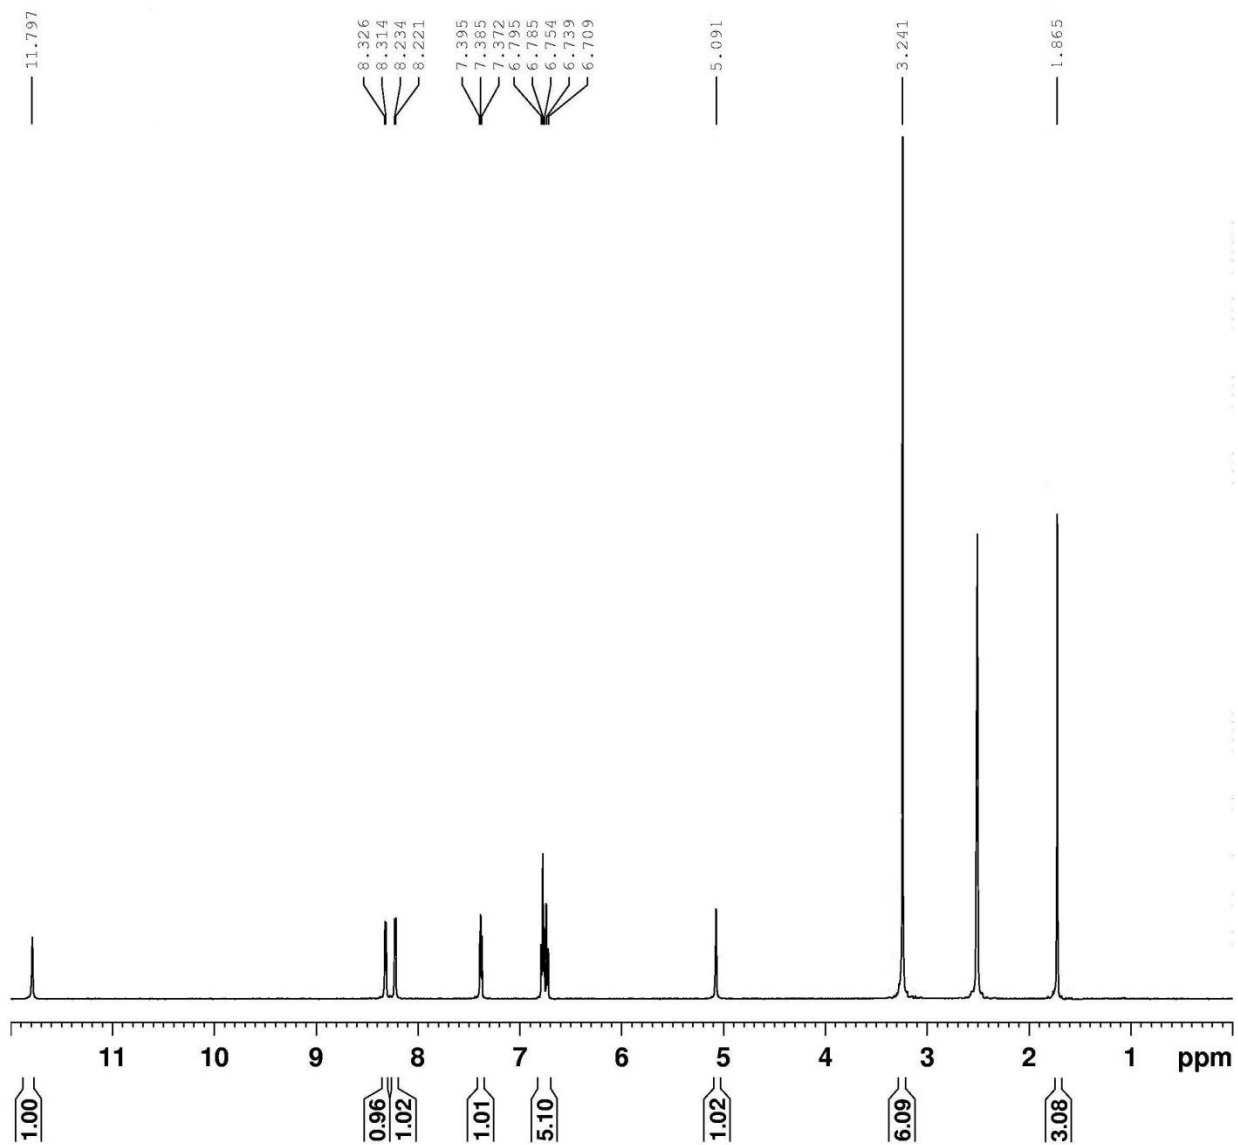

### $^{13}\text{C}$ NMR of compound **4p**

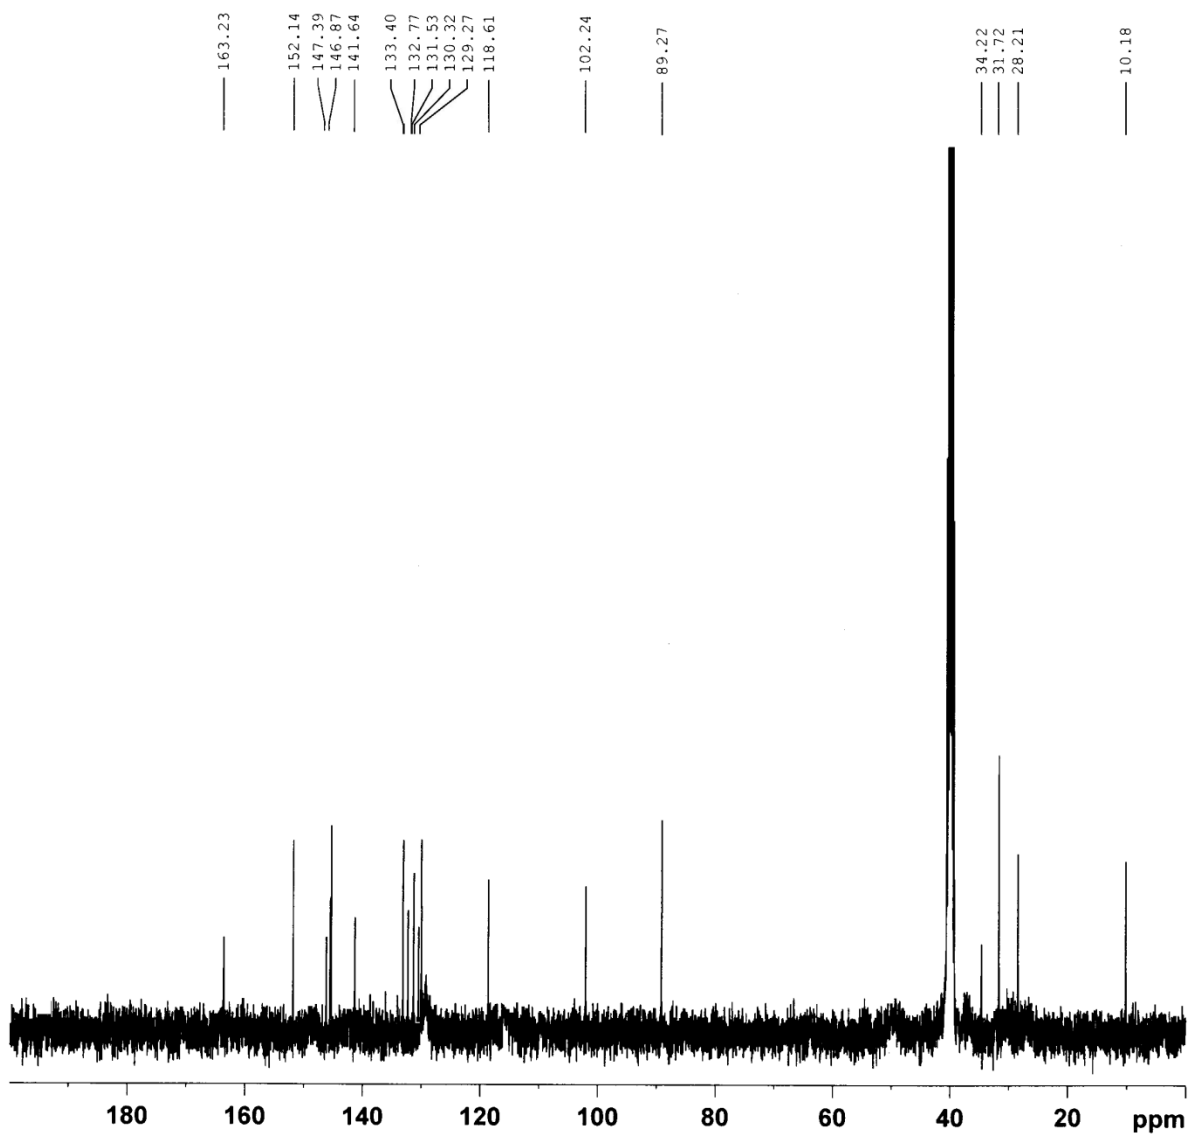

## LC-MS of compound 4q

Acquired by : Admin  
 Sample ID : 2  
 Vial# : 2  
 Injection Volume : 6  
 Data File : O2H-236-HCL  
 Method file : LCMS-ESI1cm

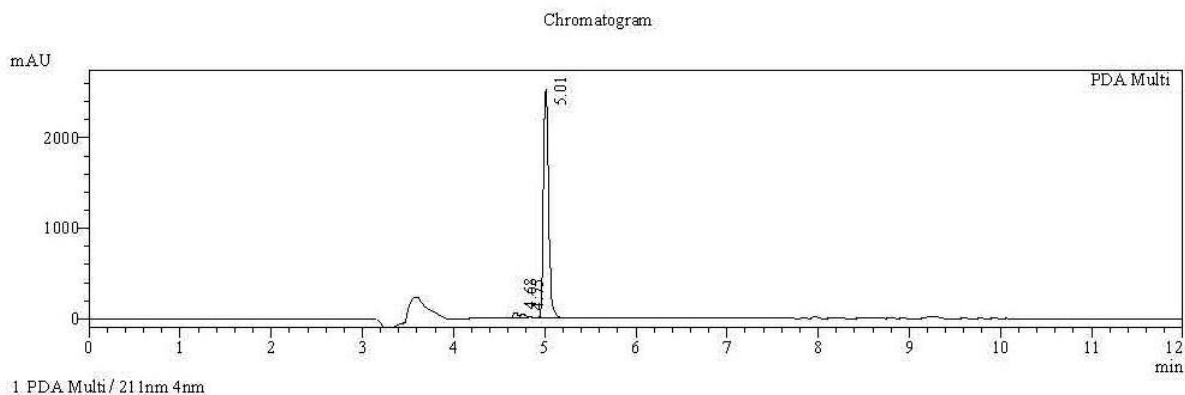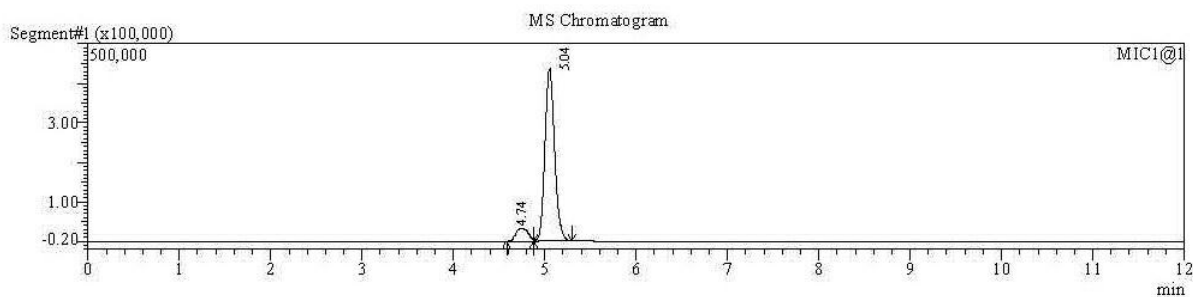

PeakTable

| Peak# | Ret. Time | Area     | Height  | Area%  |
|-------|-----------|----------|---------|--------|
| 1     | 4.68      | 177109   | 55267   | 1.74   |
| 2     | 4.75      | 125912   | 39077   | 1.24   |
| 3     | 5.01      | 9865967  | 2524600 | 97.02  |
| Total |           | 10168988 | 2618944 | 100.00 |

MSTABLE MIC1

| Peak# | Ret. Time | Base Peak m/z | Area    | Area%  | Event# |
|-------|-----------|---------------|---------|--------|--------|
| 1     | 4.74      | 448.80        | 304225  | 8.67   | 1-1    |
| 2     | 5.04      | 401.34        | 3203356 | 91.33  | 1-1    |
| Total |           |               | 3507581 | 100.00 |        |

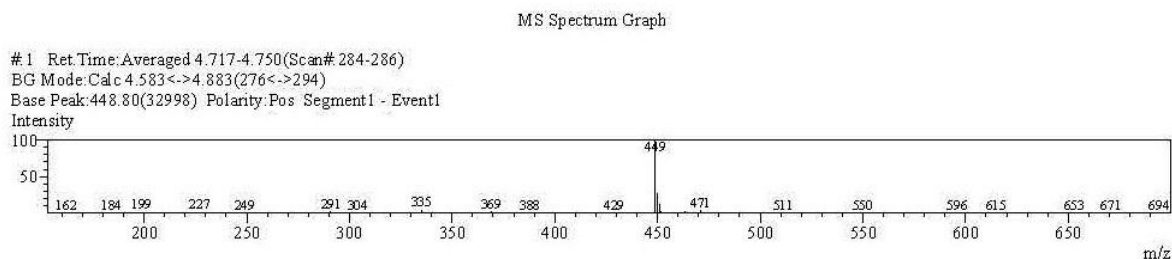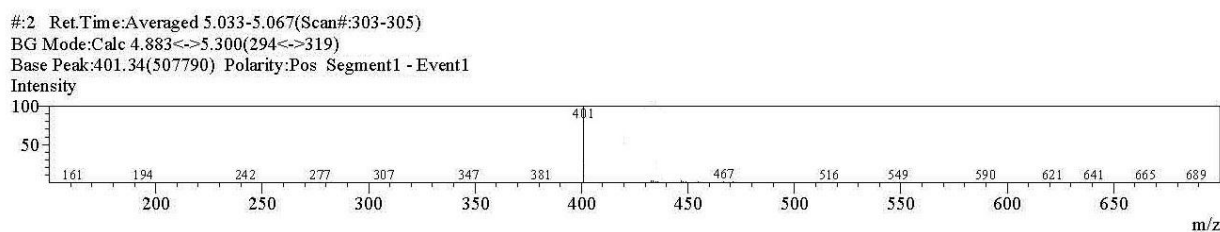

### $^1\text{H}$ NMR of compound **4q**

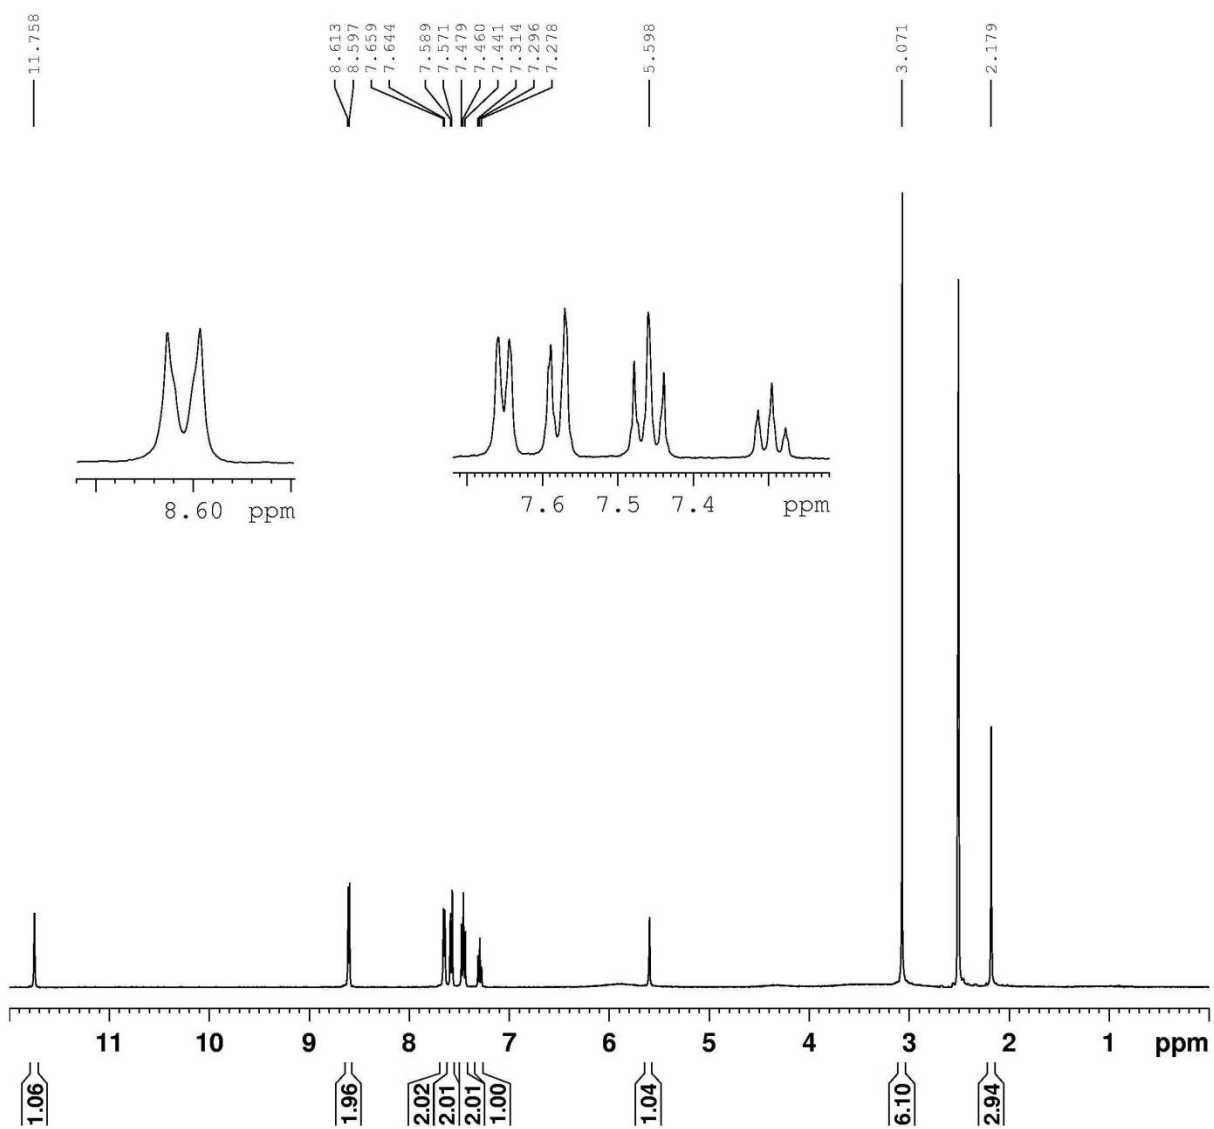



$^{13}\text{C}$ NMR of compound **4q**

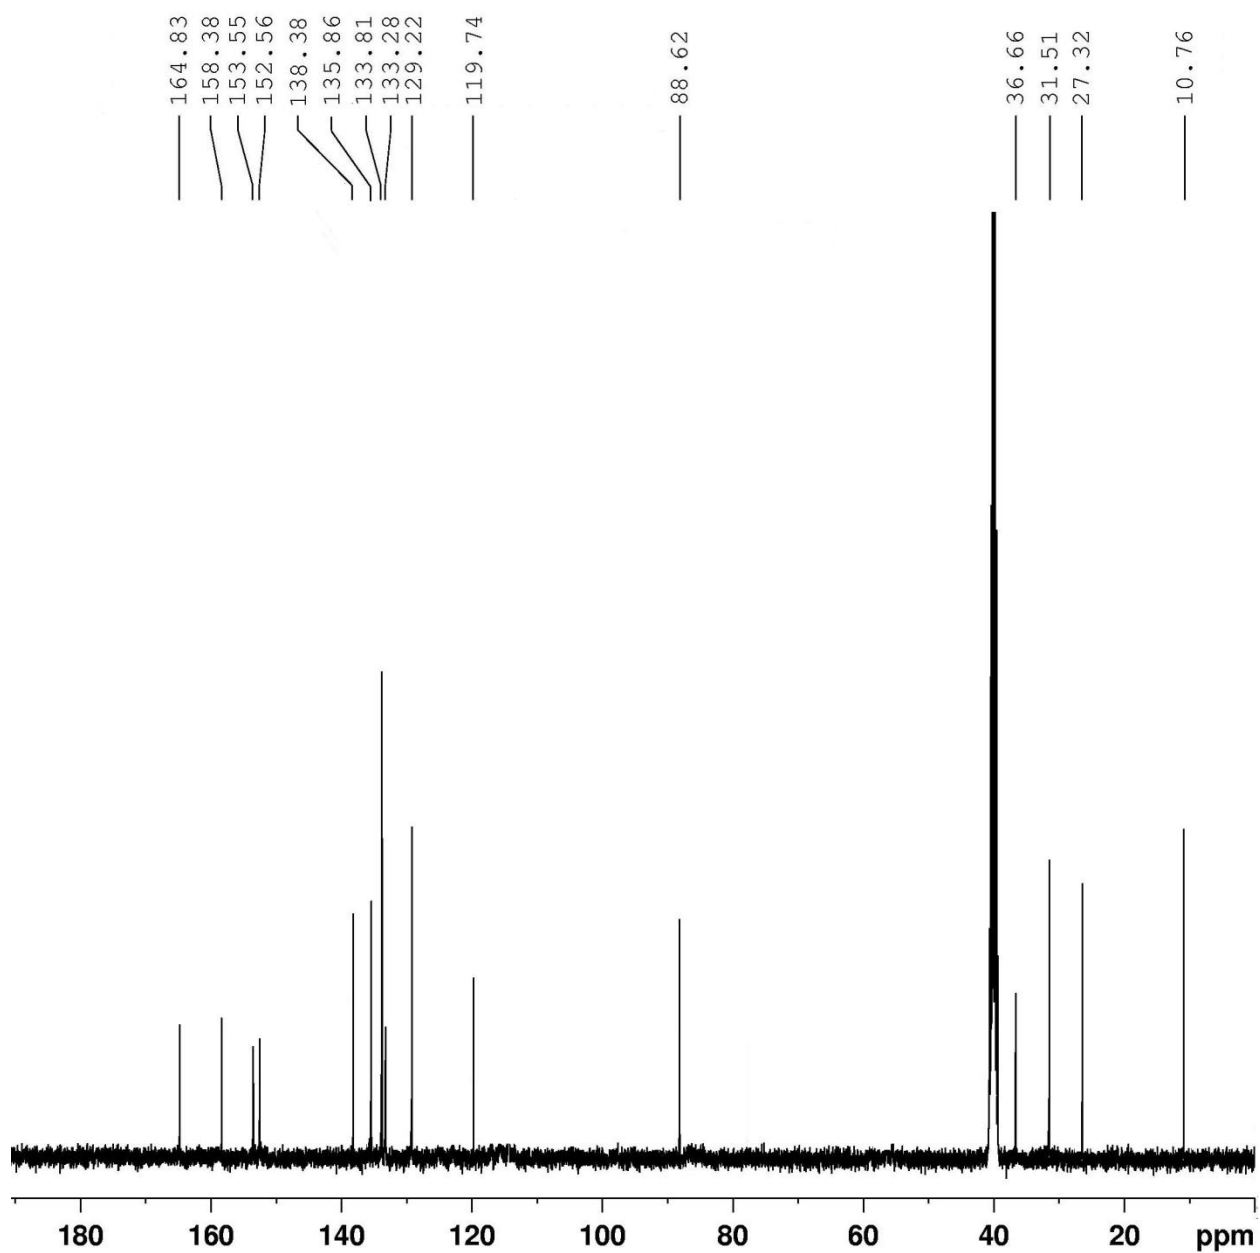

## LC-MS of compound 4r

Acquired by : Admin  
 Sample ID : O2Hr  
 Vial# : 25  
 Injection Volume : 10  
 Data File : OST-J-11-84-01-127\_lcd  
 Method file : X-BRIDGE\_150\_12min\_AA-FA.lcm

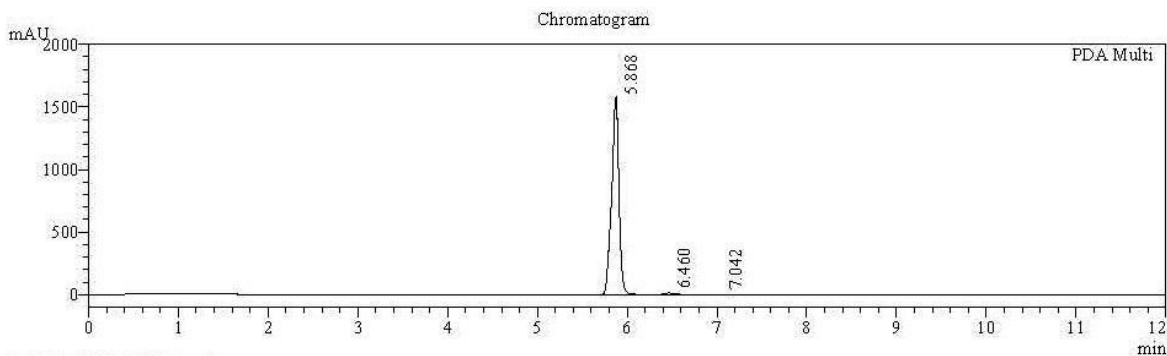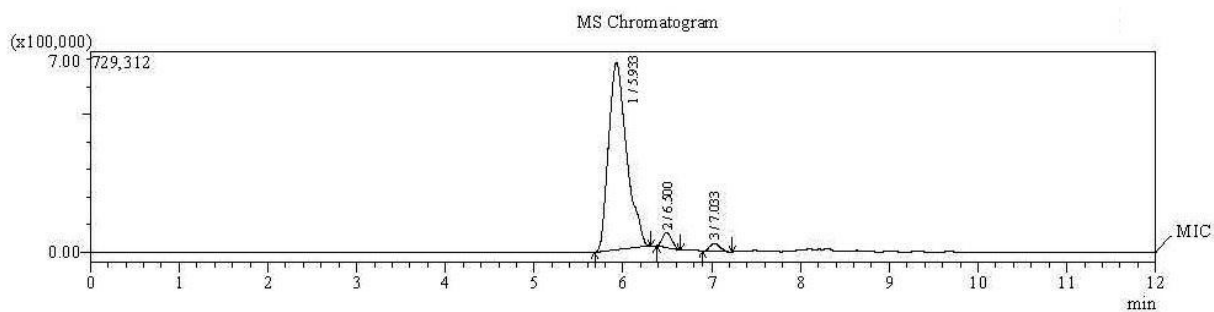

PeakTable

PDA Ch1 283nm 4nm

| Peak# | Ret. Time | Area    | Height  | Area%   |
|-------|-----------|---------|---------|---------|
| 1     | 5.868     | 8841872 | 1575526 | 99.049  |
| 2     | 6.460     | 82816   | 11704   | 0.928   |
| 3     | 7.042     | 2064    | 740     | 0.023   |
| Total |           | 8926752 | 1587970 | 100.000 |

MSTABLE MIC1

| Peak# | Ret. Time | Base Peak m/z | Area     | Area%  | Event# |
|-------|-----------|---------------|----------|--------|--------|
| 1     | 5.933     | 418.20        | 9641423  | 93.92  | 1-1    |
| 2     | 6.500     | 322.20        | 397415   | 3.87   | 1-1    |
| 3     | 7.033     | 486.55        | 227350   | 2.21   | 1-1    |
| Total |           |               | 10266188 | 100.00 |        |

MS Spectrum Graph

#1 Ret. Time: Averaged 5.917-5.950 (Scan# 356-358)

BG Mode: Calc 5.683<->6.317(342<->380)

Base Peak: 418.20(751691) Polarity: Pos Segment1 - Event1

Intensity

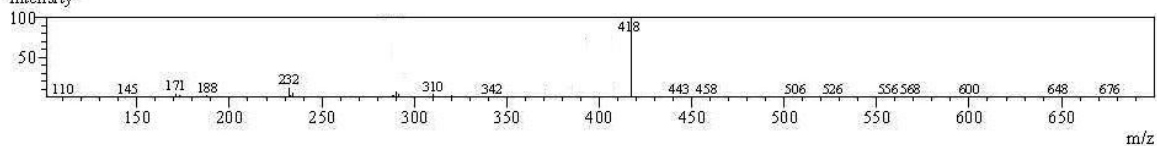

#2 Ret.Time:Averaged 6.483-6.517(Scan#:390-392)  
BG Mode:Calc 6.383<->6.650(384<->400)  
Mass Peaks:302 Base Peak:322.20(81258) Polarity:Pos Segment1 - Event1

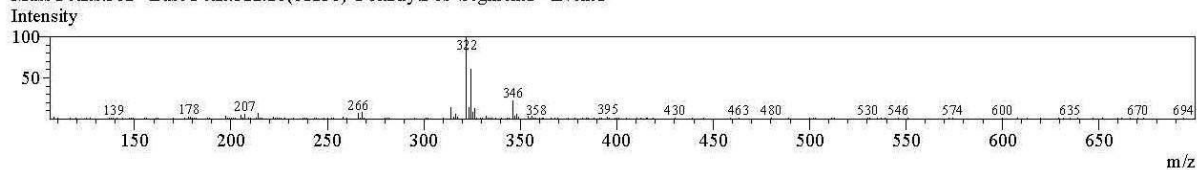

#3 Ret.Time:Averaged 7.017-7.050(Scan#:422-424)  
BG Mode:Calc 6.900<->7.233(415<->435)  
Mass Peaks:298 Base Peak:486.55(52844) Polarity:Pos Segment1 - Event1

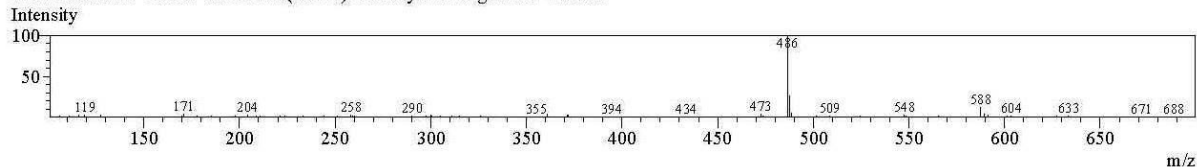

### <sup>1</sup>HNMR of compound 4r

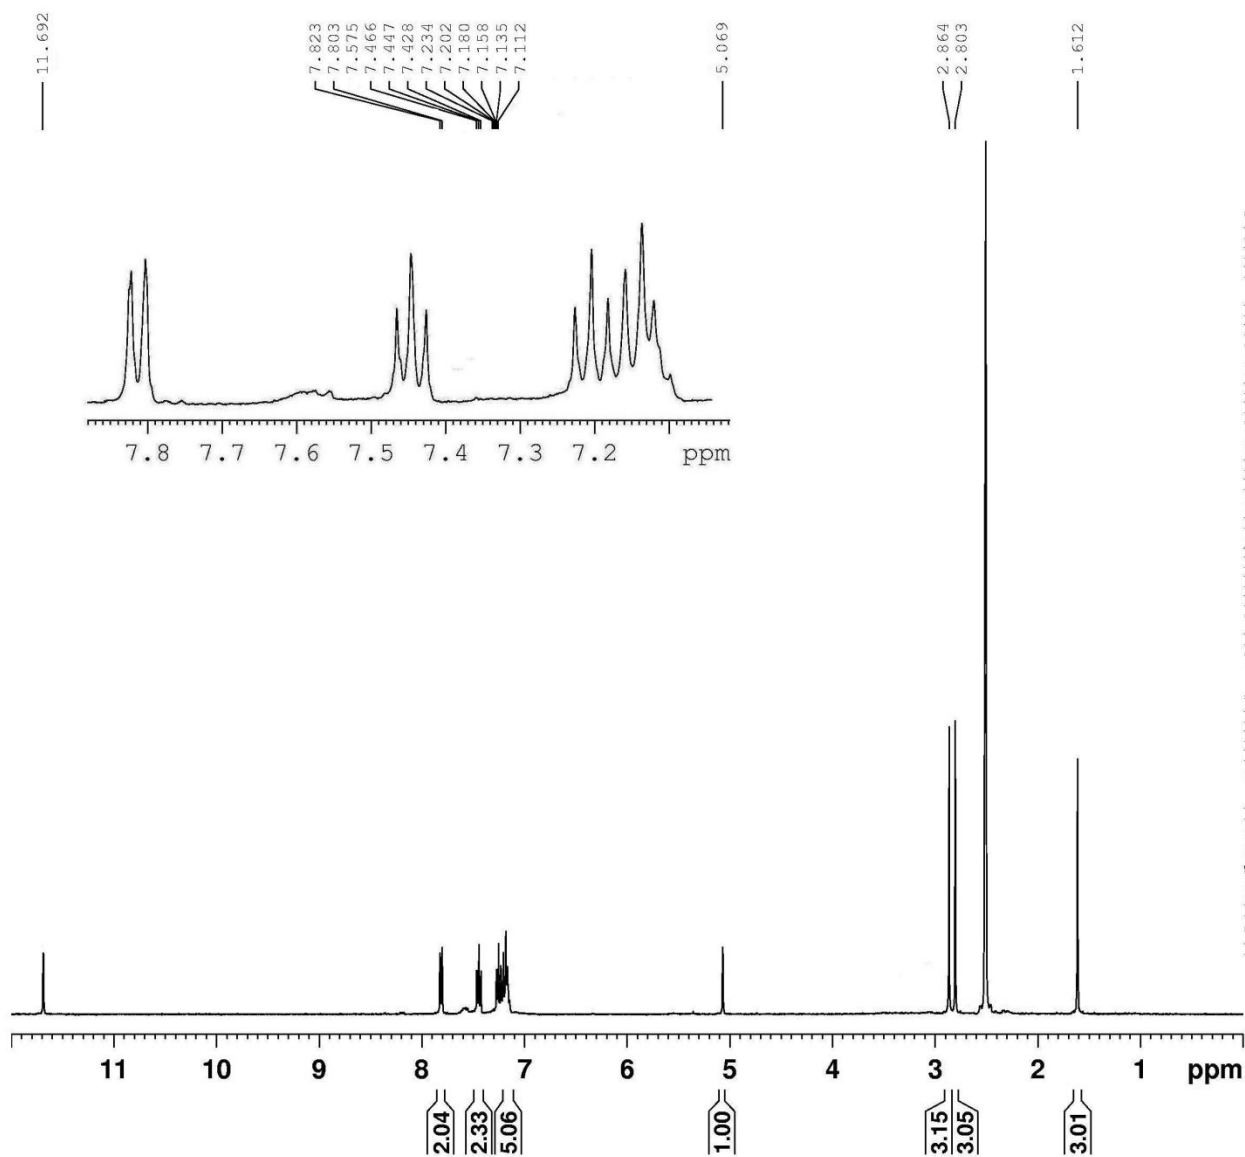

### $^{13}\text{C}$ NMR of compound **4r**

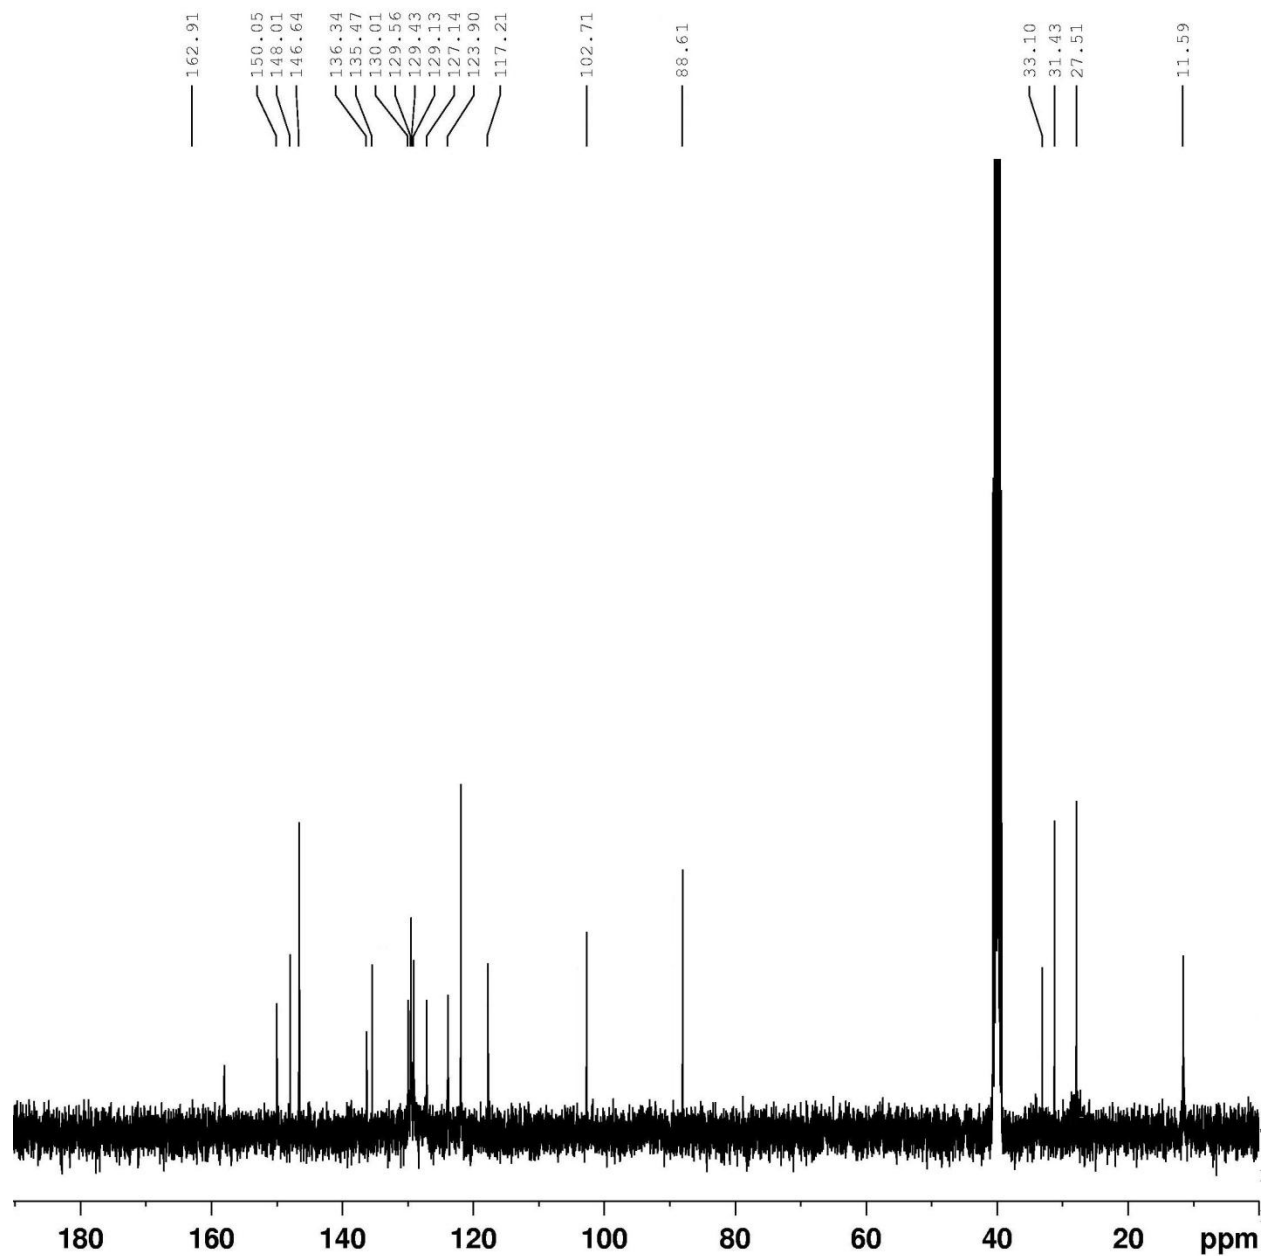

### References

- [1] A. Rattan, in: *B. I. Churchill, Antimicrobials in Laboratory Medicine*. Livingstone, New Delhi, 2000, 85.
- [2] W. Trager, J.B. Jensen, *Science*, 1976, **193**, 673.
- [3] L.H. Carvalho, A.U. Krettli, *Mem. Inst. Oswaldo. Cruz. (Suppl. II)* **86**, 181.
- [4] C. Lambros, J.P. van der Berg, *J. Parasitol.* 1979, **65**, 418.
